# Supplementary material
Source: MDPI journal article supplement (https://www.mdpi.com/2073-445X/12/6/1171)
Supplement: s1 [file s1]

Archive with 5 entries (5 files):
- Suppl.Material_Review_NCA-LCA_SM1.xlsx
- Suppl.Material_Review_NCA-LCA_SM2.pdf
- Suppl.Material_Review_NCA-LCA_SM3.pdf
- Suppl.Material_Review_NCA-LCA_SM4.pdf
- Suppl.Material_Review_NCA-LCA_SM5.pdf
