# Supplementary material
Source: MDPI journal article supplement (https://www.mdpi.com/2073-445X/12/6/1171)
Supplement: s1 [file s1 › Suppl.Material_Review_NCA-LCA_SM1.xlsx]

## Sheet: Frontpage
		Supplementary Material 1 (SM1)
Data and results from the critical review analysis

## Sheet: Table S1.1
	Table S1.1 Literature on ES accounting in LCA selected for the non-systematic review analysis
	Main criteria of selection:
		Review and Article-based documentation in English published in the last five years (data access: December 2022)
	Search string in Scopus®:
		( TITLE-ABS-KEY ( "ecosystem service" ) AND TITLE-ABS-KEY ( "life cycle analysis" ) OR TITLE-ABS-KEY ( "lifecycle analysis" ) OR TITLE-ABS-KEY ( "life-cycle analysis" ) OR TITLE-ABS-KEY ( "life cycle assessment" ) OR TITLE-ABS-KEY ( "life cycle assessment" ) OR TITLE-ABS-KEY ( "life-cycle assessment" ) OR TITLE-ABS-KEY ( "environmental footprint" ) OR TITLE-ABS-KEY ( "life cycle cost*" ) OR TITLE…
	Authors	Year	Title	Source title	Abstract	Document Type	Web link	Volume	Issue	Art. No.	Page start	Page end	Page count	Weblink
	Babí Almenar J., Petucco C., Navarrete Gutiérrez T., Chion L., Rugani B.	2023	Assessing Net Environmental and Economic Impacts of Urban Forests: An Online Decision Support Tool	Land	Nature-based solutions (NBS) are becoming popular in urban planning and policy making as cost-effective solutions capable of delivering multiple ecosystem services and addressing several societal challenges. So far, however, the cost-effectiveness of urban NBS projects has not been consistently quantified by built environment professionals, who lack user-friendly tools to account for the environm…	Article	https://doi.org/10.3390/land12010070	12	1	70				https://doi.org/10.3390/land12010070
	Babí Almenar J., Petucco C., Sonnemann G., Geneletti D., Elliot T., Rugani B.	2023	Modelling the net environmental and economic impacts of urban nature-based solutions by combining ecosystem services, system dynamics and life cycle thinking: An application to urban forests	Ecosystem Services	Nature-based solutions (NBS) are gaining relevance as sustainable urban actions because of their potential to provide multiple benefits in the form of ecosystem services (ES), and thus mitigate urban challenges. This paper presents an original semi-dynamic modelling framework that simultaneously considers i) ES supply and demand dynamics, ii) negative environmental impacts, externalities, and fin…	Article	https://doi.org/10.1016/j.ecoser.2022.101506	60		101506				https://doi.org/10.1016/j.ecoser.2022.101506
	Cabot M.I., Lado J., Sanjuán N.	2023	Multi-season environmental life cycle assessment of lemons: A case study in south Uruguay	Journal of Environmental Management	Lemons are a relevant agricultural commodity in Uruguay, mainly exported for fresh consumption. Food eco-labels are on the rise worldwide as consumers and authorities are increasingly demanding them. However, there is a lack of scientific studies estimating the environmental impacts of Uruguayan citrus production. This study aims to assess the environmental performance of lemon production in Urug…	Article	https://doi.org/10.1016/j.jenvman.2022.116719	326		116719				https://doi.org/10.1016/j.jenvman.2022.116719
	Li Z., Zhai Y., Zhang T., Zhou X., Cheng Z., Xu T., Li C., Hong J.	2023	How can ecosystem status be more comprehensively reflected? A case study of Jinan City, China	Science of the Total Environment	Ecosystems provide benefits to human well-being, but highly concentrated human activities also cause environmental pressure. Previous studies focused only on one aspect: either ecosystem services (ESs) or ecosystem damage (ED). To provide comprehensive view of ecosystem status in the selected study area, an integrated ecosystem performance analytic framework was established based on the ED-ESs sy…	Article	https://doi.org/10.1016/j.scitotenv.2022.160970	863		160970				https://doi.org/10.1016/j.scitotenv.2022.160970
	Platis D.P., Menexes G.C., Kalburtji K.L., Mamolos A.P.	2023	Energy budget, carbon and water footprint in perennial agro and natural ecosystems inside a Natura 2000 site as provisioning and regulating ecosystem services	Environmental Science and Pollution Research	Energy flows in perennial agro and natural ecosystems are essential and could be related to greenhouse gas emissions and increasing water demands. Energy indices and carbon and water footprint are useful tools in assessing the interaction between production systems and environmental impact inside Natura 2000 sites and enhancing ecosystem services. The main aims of this study were to determine and…	Article	https://doi.org/10.1007/s11356-022-22231-5	30	1		1288	1305		https://doi.org/10.1007/s11356-022-22231-5
	von Greyerz K., Tidåker P., Karlsson J.O., Röös E.	2023	A large share of climate impacts of beef and dairy can be attributed to ecosystem services other than food production	Journal of Environmental Management	Domesticated ruminants supply nutrient-dense foods but at a large environmental cost. However, many ruminant production systems are multi-functional, providing ecosystem services (ES) other than direct provision of food. When quantifying the climate impact of ruminant products using life cycle assessment (LCA), provisioning ES (i.e. beef and milk) are generally considered the only valuable output…	Article	https://doi.org/10.1016/j.jenvman.2022.116400	325		116400				https://doi.org/10.1016/j.jenvman.2022.116400
	Alejandre E.M., Potts S.G., Guinée J.B., van Bodegom P.M.	2022	Characterisation model approach for LCA to estimate land use impacts on pollinator abundance and illustrative characterisation factors	Journal of Cleaner Production	This study presents the first approach to characterise relative land use impacts on pollinator abundance for life cycle assessment (LCA). Pollinators make an essential contribution to global crop production and in recent years evidence of declines has raised concerns on how land use, among other factors, affects pollinators. Our novel method assesses land use impacts on pollinator abundance and p…	Article	https://doi.org/10.1016/j.jclepro.2022.131043	346		131043				https://doi.org/10.1016/j.jclepro.2022.131043
	Bach V., Hélias A., Muhl M., Wojciechowski A., Bosch H., Binder M., Finkbeiner M.	2022	Assessing overfishing based on the distance-to-target approach	International Journal of Life Cycle Assessment	Overfishing has been a global challenge for several decades with severe impacts on biodiversity and ecosystem services. Several approaches for assessing overfishing in life cycle impact assessment exist, but do not consider scarcity in line with current policy and science-based targets. Furthermore, comparisons of results with other impact categories, e.g., climate change, are not possible with e…	Article	https://doi.org/10.1007/s11367-022-02042-z	27	4		573	586		https://doi.org/10.1007/s11367-022-02042-z
	Baral N.R., Mishra S.K., George A., Gautam S., Mishra U., Scown C.D.	2022	Multifunctional landscapes for dedicated bioenergy crops lead to low-carbon market-competitive biofuels	Renewable and Sustainable Energy Reviews	Switchgrass is a promising feedstock for cellulosic biorefineries, due to its ability to maintain comparatively high biomass yields across a wide range of soil and climatic conditions. However, there is an incomplete understanding of the economic and environmental tradeoffs associated with cultivating switchgrass on low-productivity land for conversion to biofuels. This study surveys prior litera…	Article	https://doi.org/10.1016/j.rser.2022.112857	169		112857				https://doi.org/10.1016/j.rser.2022.112857
	Bergez J.-E., Béthinger A., Bockstaller C., Cederberg C., Ceschia E., Guilpart N., Lange S., Müller F., Reidsma P., Riviere C., Schader C., Therond O., van der Werf H.M.G.	2022	Integrating agri-environmental indicators, ecosystem services assessment, life cycle assessment and yield gap analysis to assess the environmental sustainability of agriculture	Ecological Indicators	Agriculture's primary function is the production of food, feed, fibre and fuel for the fast-growing world population. However, it also affects human health and ecosystem integrity. Policymakers make policies in order to avoid harmful impacts. How to assess such policies is a challenge. In this paper, we propose a conceptual framework to help evaluate the impacts of agricultural policies on the en…	Article	https://doi.org/10.1016/j.ecolind.2022.109107	141		109107				https://doi.org/10.1016/j.ecolind.2022.109107
	Brook R., Forster E., Styles D., Mazzetto A.M., Arndt C., Esquivel M.J., Chadwick D.	2022	Silvopastoral systems for offsetting livestock emissions in the tropics: a case study of a dairy farm in Costa Rica	Agronomy for Sustainable Development	Ways are being sought to reduce the environmental impact of ruminant livestock farming. Integration of trees into farming systems has been advocated as a measure to deliver ecosystem services, inter alia climate regulation and adaptation, water quality regulation, provisioning of fibre, fuel and habitats to support biodiversity. Despite the rapid expansion of cattle farming in the tropics, notabl…	Article	https://doi.org/10.1007/s13593-022-00834-z	42	5	101				https://doi.org/10.1007/s13593-022-00834-z
	Canter C.E., Zolton K., Cacho J.F., Negri M.C., Zumpf C.R., Quinn J.J.	2022	Impact of landscape design on the greenhouse gas emissions of shrub willow bioenergy buffers in a US Midwest corn-production landscape	Biofuels, Bioproducts and Biorefining	Previous studies have evaluated the economics and ecosystem services of perennial bioenergy crops when replacing grain crops on marginal (environmentally critical and/or underproductive) lands. This study used life-cycle analysis (LCA) to investigate the greenhouse gas (GHG) emissions of perennial crops when grown in targeted landscape positions and their impact in reducing nitrogen leaching. Spe…	Article	https://doi.org/10.1002/bbb.2345	16	3		629	639		https://doi.org/10.1002/bbb.2345
	Daaboul J., Moriarty P., Palmer G., Honnery D.	2022	Making energy green – A method for quantifying the ecosystem maintenance energy and the green energy return on energy invested	Journal of Cleaner Production	Limiting the impact of human use of energy on the environment is necessary to maintain the Earth's ecosystems such that they can continue to provide the ecosystem services on which humans and all other living organisms depend. Because the methods available to limit the impact on the environment of energy production and use require energy, energy used for this purpose—termed ecosystem maintenance …	Article	https://doi.org/10.1016/j.jclepro.2022.131037	344		131037				https://doi.org/10.1016/j.jclepro.2022.131037
	Dick M., Abreu da Silva M., Franklin da Silva R.R., Ferreira O.G.L., Maia M.D.S., Lima S.F.D., Paiva Neto V.B.D., Dewes H.	2022	Climate change and land use from Brazilian cow-calf production amidst diverse levels of biodiversity conservation	Journal of Cleaner Production	Pasture-based animal production is a determinant in shaping biomes worldwide, with historical and cultural effects. It affects land use, landscapes, ecosystem conservation, and climate change. Converting forages into high-value-food livestock production evolved as essential for human nutrition and health, economics, and poverty reduction. A better understanding of the interactions of livestock wi…	Article	https://doi.org/10.1016/j.jclepro.2022.130941	342		130941				https://doi.org/10.1016/j.jclepro.2022.130941
	Elliot T., Goldstein B., Gómez-Baggethun E., Proença V., Rugani B.	2022	Ecosystem service deficits of European cities	Science of the Total Environment	Climate change and biodiversity loss are two pressing global environmental challenges that are tightly coupled to urban processes. Cities emit greenhouse gases through the consumption of materials and energy. Urban expansion encroaches on local habitats, while urban land teleconnections simultaneously degrade distant ecosystems. These processes decrease the supply of and increase the demand for e…	Article	https://doi.org/10.1016/j.scitotenv.2022.155875	837		155875				https://doi.org/10.1016/j.scitotenv.2022.155875
	Escribano M., Horrillo A., Mesías F.J.	2022	Greenhouse gas emissions and carbon sequestration in organic dehesa livestock farms. Does technical-economic management matters?	Journal of Cleaner Production	Livestock farming has been traditionally assessed by its economic figures, whereas the impact caused by their production models on the environment and on society have been largely disregarded. This paper analyses various organic cattle farming systems from the point of view of their technical-economic management, but also on the environmental impact caused by their greenhouse gas (GHG) emissions.…	Article	https://doi.org/10.1016/j.jclepro.2022.133779	372		133779				https://doi.org/10.1016/j.jclepro.2022.133779
	Field J.L., Zhang Y., Marx E., Boote K.J., Easter M., George S., Hoghooghi N., Johnston G., Masum F.H., Mulvaney M.J., Paustian K., Seepaul R., Swan A., Williams S., Wright D., Dwivedi P.	2022	Modeling Yield, Biogenic Emissions, and Carbon Sequestration in Southeastern Cropping Systems With Winter Carinata	Frontiers in Energy Research	Sustainable aviation fuel (SAF) production from lipids is a technologically mature approach for replacing conventional fossil fuel use in the aviation sector, and there is increasing demand for such feedstocks. The oilseed Brassica carinata (known as Ethiopian mustard or simply carinata) is a promising SAF feedstock that can be grown as a supplemental cash crop over the winter fallow season of va…	Article	https://doi.org/10.3389/fenrg.2022.837883	10		837883				https://doi.org/10.3389/fenrg.2022.837883
	Freer-Smith P., Muys B., Farrelly N., Drössler L., Minotta G.	2022	The land use impacts of forestry and agricultural systems relative to natural vegetation; a fundamental energy dissipation approach	Science of the Total Environment	In agriculture and forestry the land use impacts that occur during production are important; including as necessary inputs for life cycle assessments. There are major differences in land use impacts between different forest management approaches and, in future, those forestry systems which deliver ecosystem services while having lower adverse land use impacts will be of greater value. Here we exa…	Article	https://doi.org/10.1016/j.scitotenv.2022.158000	850		158000				https://doi.org/10.1016/j.scitotenv.2022.158000
	Hayashi K.	2022	Partitioning product footprint changes into yield and environmental improvement effects: toward life cycle assessment of agricultural system transitions	International Journal of Life Cycle Assessment	Recent agricultural policies require the complementary use of area-based and product-based environmental indicators to assess agricultural system transitions because both alleviating productivity-environment trade-offs and increasing food value chain sustainability are crucial in successful policy decisions. However, there is a dilemma due to the exclusiveness between representing trade-offs in t…	Article	https://doi.org/10.1007/s11367-022-02112-2							https://doi.org/10.1007/s11367-022-02112-2
	Liu H., Yin H., Kong F., Middel A., Zheng X., Huang J., Sun T., Wang D., Lensky I.M.	2022	Change of nutrients, microorganisms, and physical properties of exposed extensive green roof substrate	Science of the Total Environment	Green roofs (GR) can be used as a nature-based solution to tackle eco-environmental problems caused by climate change and rapid urbanization. The substrate in the GRs is the growing medium for vegetation, and its properties directly affect the ecosystem services of GRs. To investigate the characteristic changes of an exposed substrate after the removal of vegetation, a one-year field experiment w…	Article	https://doi.org/10.1016/j.scitotenv.2021.150344	805		150344				https://doi.org/10.1016/j.scitotenv.2021.150344
	Liu X., Zheng X., Wu L., Deng S., Pan H., Zou J., Zhang X., Luo Y.	2022	Techno-ecological synergies of hydropower plants: Insights from GHG mitigation	Science of the Total Environment	Hydropower is a source of climate-friendly energy; however, its ecological impacts have been criticized. Few studies have considered the greenhouse gas (GHG) emissions resulting from ecosystem restoration. This study proposes a techno-ecological synergy framework based on life cycle assessment (LCA) to evaluate 34 hydropower plants (HPs) in the upper reaches of the Yangtze River from GHG supply a…	Article	https://doi.org/10.1016/j.scitotenv.2022.158602	853		158602				https://doi.org/10.1016/j.scitotenv.2022.158602
	Mickovski S.B., Gonzalez-Ollauri A., Thomson C., Gallagher C., Tardio G.	2022	Assessment of the Sustainability Performance of Eco-Engineering Measures in the Mediterranean Region	Land	Eco-engineering has a crucial role in defining and achieving the sustainability credentials of a civil engineering project. Better eco-engineering practices would help better in reducing the adverse impacts on the environment and society, but also on the financial performance of the project. However, the assessment of the sustainability effects of eco-engineering strategies can be challenging, as…	Article	https://doi.org/10.3390/land11040533	11	4	533				https://doi.org/10.3390/land11040533
	Oliveira M., Santagata R., Kaiser S., Liu Y., Vassillo C., Ghisellini P., Liu G., Ulgiati, S.	2022	Socioeconomic and Environmental Benefits of Expanding Urban Green Areas: A Joint Application of i-Tree and LCA Approaches	Land	Green infrastructures deliver countless functions for counteracting climate change, air pollution, floods, and heat islands, contributing at the same time to water and carbon recycling as well as to renewable energies and feedstock provisioning. Properly addressing such environmental problems would require huge investments that could be decreased thanks to the further implementation of urban fore…	Article	https://doi.org/10.3390/su14053103	14	5	3103				https://doi.org/10.3390/su14053103
	Peltonen-Sainio P., Jauhiainen L.	2022	Come Out of a Hiding Place: How Are Cover Crops Allocated on Finnish Farms?	Sustainability (Switzerland)	Cover crops (CCs) may provide many ecosystem services for crop production systems, and interest has increased in the cultivation of CCs among Finnish farmers. Piloting farmers applied for agricultural payments to support the cultivation of CCs (AP-CCs) in 2020. Novel data with a total of 34,515 field parcels with CCs from 5747 farms was used to assess how farmers allocated CCs depending on farm a…	Article	https://doi.org/10.1016/j.scs.2022.103754	80		103754				https://doi.org/10.1016/j.scs.2022.103754
	Peponi A., Morgado P., Kumble P.	2022	Life cycle thinking and machine learning for urban metabolism assessment and prediction	Sustainable Cities and Society	The real-world urban systems represent nonlinear, dynamical, and interconnected urban processes that require better management of their complexity. Thereby, we need to understand, measure, and assess the structure and functioning of the urban processes. We propose an innovative and novel evidence-based methodology to manage the complexity of urban processes, that can enhance their resilience as p…	Article	https://doi.org/10.3390/su14041966	14	4	1966				https://doi.org/10.3390/su14041966
	Schinkel U., Becker N., Trapp M., Speck M.	2022	Assessing the Contribution of Innovative Technologies to Sustainable Development for Planning and Decision-Making Processes: A Set of Indicators to Describe the Performance of Sustainable Urban Infrastructures (ISI)	Sustainability (Switzerland)	The sustainable development of our cities and regions has become an integral part of the current debate. To achieve the sustainability goals, however, the development of sustainable technologies and infrastructures as well as decisive municipal action at the local level are essential. The research project VertiKKA (“Vertical Air Conditioning and Wastewater Treatment System”), sponsored by the Ger…	Article	https://doi.org/10.1007/s10750-022-05030-4							https://doi.org/10.1007/s10750-022-05030-4
	Seena S., Baschien C., Barros J., Sridhar K.R., Graça M.A.S., Mykrä H., Bundschuh M.	2022	Ecosystem services provided by fungi in freshwaters: a wake-up call	Hydrobiologia	The set of functions and resources derived from ecosystems are broadly described as ecosystem services. Human society is gratified by a diverse range of services from the freshwater ecosystems to which fungi contribute significantly; yet they are unacknowledged for the services they provide. Aquatic fungi, especially aquatic hyphomycetes, are a distinct ecological group of organisms, accomplishin…	Article	https://doi.org/10.1007/s11356-022-23405-x	29	52		78228	78254		https://doi.org/10.1007/s11356-022-23405-x
	Tams L., Nehls T., Calheiros C.S.C.	2022	Rethinking green roofs- natural and recycled materials improve their carbon footprint	Building and Environment	Green roofs contribute to climate regulation and urban heat island mitigation, thereby counteracting heat stress. Ecosystem services of green roofs are discussed, but their production and demolition processes have not been fully addressed. In this study, a life cycle analysis (LCA) was conducted to assess the possibility of creating of a carbon-neutral green roof and to evaluate and compare the g…	Article	https://doi.org/10.1016/j.foodpol.2021.102196	107		102196				https://doi.org/10.1016/j.foodpol.2021.102196
	Tziolas E., Ispikoudis S., Mantzanas K., Koutsoulis D., Pantera A.	2022	Economic and Environmental Assessment of Olive Agroforestry Practices in Northern Greece	Agriculture (Switzerland)	Preservation and promotion of agroforestry systems entails the ideology for more ecosystem services, additional biodiversity benefits and climate change mitigation. Furthermore, farmland and forest landscapes and the consequent benefits to the environment from their combination, enhance the importance of agroforestry systems towards sustainable environmental policies. Nevertheless, traditional ag…	Article	https://doi.org/10.1016/j.jclepro.2022.133454	370		133454				https://doi.org/10.1016/j.jclepro.2022.133454
	Vance C., Mainardis M., Magnolo F., Sweeney J., Murphy F.	2022	Modeling the effects of ecosystem changes on seagrass wrack valorization: Merging system dynamics with life cycle assessment	Journal of Cleaner Production	Seagrass meadows, while recognized as essential ecosystem service providers, are degrading worldwide. This has a profound impact on the environment but also on socioeconomic systems which hope to utilize beach-cast seagrass (wrack) as a bioresource. This study integrates system dynamics (SD) thinking with life cycle assessment (LCA) and life cycle costing (LCC) to understand how a degraded ecosys…	Article	https://doi.org/10.3390/su141710698	14	17	10698				https://doi.org/10.3390/su141710698
	Visintin F., Tomasinsig E., Spoto M., Marangon F., D’Ambrosio P., Muscogiuri L., Fai S., Troiano S.	2022	Assessing the Benefit Produced by Marine Protected Areas: The Case of Porto Cesareo Marine Protected Area (Italy)	Sustainability (Switzerland)	The article focuses on the integrated environmental accounting model called ‘eValue’, developed for protected areas and applied in the research programme coordinated by the Italian Ministry of the Environment and aimed at implementing an environmental accounting system for Italian Marine Protected Areas (MPAs). eValue adopts a cost-benefit analysis approach. Financial accounting based on costs an…	Article	https://doi.org/10.5890/JEAM.2022.09.004	10	3		253	267		https://doi.org/10.5890/JEAM.2022.09.004
	Visintin F., Tomasinsig E., Spoto M., Marangon F., Mastrototaro F., Chimienti G., Montesanto F., Troiano S.	2022	Integrated Environmental Accounting for Assessing the Value for Money in Marine Protected Areas: The Case of Tremiti Islands (Italy)	Journal of Environmental Accounting and Management	The paper focuses on the integrated environmental accounting model called “eValue” developed for protected areas and applied in the research programme coordinated by the Italian Ministry of Environment aiming to implement an environmental accounting system for the Italian Marine Protected Areas (MPAs). eValue aimed to calculate the economic value of Protected Areas adopting a Cost-Benefit Analysi…	Article	https://doi.org/10.3390/agronomy12123071	12	12	3071				https://doi.org/10.3390/agronomy12123071
	Wagner M., Winkler B., Lask J., Weik J., Kiesel A., Koch M., Clifton-Brown J., von Cossel M.	2022	The True Costs and Benefits of Miscanthus Cultivation	Agronomy	Agroecosystems provide numerous ecosystem services (ESs) such as provisioning, regulating, habitat and cultural services. At the same time, the management of these agroecosystems can cause various negative impacts on the environment such as the generation of greenhouse gas emissions. However, the way humans manage agroecosystems often focuses only on the production of agricultural goods, which yi…	Article	https://doi.org/10.3389/fenvs.2022.824275	10		824275				https://doi.org/10.3389/fenvs.2022.824275
	Wang Y., Liu G., Cai Y., Giannetti B.F., Agostinho F., Almeida C.M.V.B., Casazza M.	2022	The Ecological Value of Typical Agricultural Products: An Emergy-Based Life-Cycle Assessment Framework	Frontiers in Environmental Science	Agri-products have an impact on food security, ecology protection, and crucial strategic deployment. With this respect, the economic value of agri-products should be paralleled with a non-monetary assessment of ecological value for humans. This study set up an emergy-based life-cycle assessment (Em-LCA) framework to calculate the ecosystem service (ES) and ecosystem dis-services (EDS) that was ap…	Article	https://doi.org/10.1016/j.jclepro.2022.135187	381		135187				https://doi.org/10.1016/j.jclepro.2022.135187
	Xing S., Zhang X., Jiang Z., Gong Q., Wang Y.	2022	Full lifecycle-based sustainability evaluation for remanufacturing ecosystem services: A novel perspective of technology-ecology synergy	Journal of Cleaner Production	Ecosystems play a very important role in the sustainable development of remanufacturing. Research has often focused on the sustainability of remanufacturing systems from the aspect of general technological activities, for which there is a lack of an in-depth consideration of ecological services. This may lead to an imbalanced development of ecosystems. This paper proposes a full lifecycle-based s…	Article	https://doi.org/10.1007/s13157-022-01624-9	42	8	107				https://doi.org/10.1007/s13157-022-01624-9
	Yadav S., Goyal V.C.	2022	Current Status of Ponds in India: A Framework for Restoration, Policies and Circular Economy	Wetlands	Healthy pond ecosystems are critical for achieving several sustainable development goals (SDG) through numerous ecosystem services (e.g., flood control, nutrient retention, and carbon sequestration). However, the socio-economic and ecological value of ponds is often underestimated compared to the larger water bodies. Ponds are highly vulnerable to mounting land-use pressures (e.g., urban expansio…	Article	https://doi.org/10.1016/j.ecoser.2022.101442	56		101442				https://doi.org/10.1016/j.ecoser.2022.101442
	Zhen H., Qiao Y., Zhao H., Ju X., Zanoli R., Waqas M.A., Lun F., Knudsen M.T.	2022	Developing a conceptual model to quantify eco-compensation based on environmental and economic cost-benefit analysis for promoting the ecologically intensified agriculture	Ecosystem Services	Eco-compensation is essential for promoting ecologically intensive agriculture to reduce the environmental impact of the agricultural sector. However, a comprehensive and performance-based tool to quantify eco-compensation is not yet available. Here, we present a comprehensive model of eco-compensation standards based on internal and external trade-offs (ESBIET) and their valuation methods based …	Article	https://doi.org/10.1016/j.renene.2021.07.140	179			1548	1564		https://doi.org/10.1016/j.renene.2021.07.140
	Alizadeh S., Avami A.	2021	Development of a framework for the sustainability evaluation of renewable and fossil fuel power plants using integrated LCA-emergy analysis: A case study in Iran	Renewable Energy	This study presents a comprehensive framework for evaluating renewable and non-renewable power plants' performance using the Life Cycle Analysis (LCA) and emergy analysis. The emergy analysis is used to consider the free ecosystem services in the sustainability of the systems as a supplement to the LCA. The results indicate that the wind and photovoltaic power plants have the best performance in …	Article	https://doi.org/10.1016/j.jcomc.2021.100111	4		100111				https://doi.org/10.1016/j.jcomc.2021.100111
	Arzoumanidis I., Petti L., Raucci D., Raggi A.	2021	Multifunctional modelling in the life cycle assessment of honey considering pollination	International Journal of Life Cycle Assessment	An apicultural system is characterised by multifunctionality, with one of the functions being the pollination service performed by honeybees, which is of fundamental importance for the nutrition of mankind. The discussion on including ecosystem services in the life cycle assessment (LCA) methodology has opened; this article proposes an alternative way of considering ecosystem services in the spec…	Article	https://doi.org/10.1007/s11367-021-01868-3	26	2		417	433		https://doi.org/10.1007/s11367-021-01868-3
	Aung T.S., Fischer T.B., Azmi A.S.	2021	Social impacts of large-scale hydropower project in Myanmar: a social life cycle assessment of Shweli hydropower dam 1	International Journal of Life Cycle Assessment	Hydropower is currently the primary renewable energy source for Myanmar. However, hydropower projects can cause direct and indirect detrimental impacts on the livelihoods of populations. Social impacts of planned hydropower projects should therefore be assessed. In this paper, we report on the application of a Social Life Cycle Assessment (S-LCA) for evaluating social and human rights impacts of …	Article	https://doi.org/10.1111/gcbb.12783	13	2		291	304		https://doi.org/10.1111/gcbb.12783
	Blanco-Canqui H.	2021	Does biochar improve all soil ecosystem services?	GCB Bioenergy	Biochar is considered to sequester C and deliver other soil ecosystem services, but an overview that synthesizes the current knowledge of biochar implications on all essential soil ecosystem services is difficult to find in the ample biochar literature. Most previous research and review articles on this topic focused on a single ecosystem service and did not integrate all essential soil ecosystem…	Article	https://doi.org/10.1016/j.agsy.2021.103062	189		103062				https://doi.org/10.1016/j.agsy.2021.103062
	Cecchin A., Pourhashem G., Gesch R.W., Lenssen A.W., Mohammed Y.A., Patel S., Berti M.T.	2021	Environmental trade-offs of relay-cropping winter cover crops with soybean in a maize-soybean cropping system	Agricultural Systems	Winter camelina [Camelina sativa (L.) Crantz] and field pennycress [Thlaspi arvense L.] are oilseed feedstocks that can be employed as winter-hardy cover crops in the current cropping systems in the U.S. upper Midwest. In addition to provide multiple ecosystem services, they can be a further source of income for the farmer. However, using these cover crops is a new agricultural practice that has …	Article	https://doi.org/10.1016/j.scitotenv.2021.145018	773		145018				https://doi.org/10.1016/j.scitotenv.2021.145018
	Chen H.-P., Lee M., Chiueh P.-T.	2021	Creating ecosystem services assessment models incorporating land use impacts based on soil quality	Science of the Total Environment	Life cycle assessment (LCA) is a widely applied approach used to evaluate the environmental impacts of a product or service across its life cycle stages; however, the impacts of land use on ecosystem services are less addressed in most LCA studies. This study, therefore, aims to improve the LCA model by incorporating a new impact category of land use on ecosystem services at both midpoint and end…	Article	https://doi.org/10.1007/s11356-020-10770-8	28	4		4463	4471		https://doi.org/10.1007/s11356-020-10770-8
	Chen W., Geng Y., Wang C., Zhong S.	2021	Life cycle thinking–based eco-compensation for gold ingot production: a case study in China	Environmental Science and Pollution Research	Unearthing mineral resources has brought about serious impacts on the natural ecosystem. Eco-compensation of mineral resources has been proposed; however, the lack of a systematic method for evaluating eco-compensation criteria has limited its implementation and progress. Life cycle thinking is proposed for evaluating eco-compensation criteria because it provides a holistic view for stakeholders …	Article	https://doi.org/10.1016/j.jclepro.2020.125716	289		125716				https://doi.org/10.1016/j.jclepro.2020.125716
	Cui J., Sui P., Wright D.L., Wang D., Yang J., Lv Z., Chen Y.	2021	A revised integrated framework to evaluate the sustainability of given cropping systems	Journal of Cleaner Production	Sustainable agriculture is one of the most important goals for the future of agriculture, environment and the humankind. The development of science and improvements of technology are key impetus to agriculture transformation. Suitable integrated evaluation method based on multi-dimension criteria is urgently needed to overcome the decision-making puzzle when facing various agricultural management…	Article	https://doi.org/10.3390/su13052837	13	5	2837	1	18		https://doi.org/10.3390/su13052837
	Fan W., Chen N., Yao W., Meng M., Wang X.	2021	Integrating environmental impact and ecosystem services in the process of land resource capitalization — A case study of land transfer in Fuping, Hebei	Sustainability (Switzerland)	The contradiction between human and land has always been a problem in the process of development and utilization of land resources. Under such circumstances, relevant government agencies put forward the management concept of land resource capitalization. As an effective policy to implement the conception of land resource capitalization, land transfer is of great significance to reforming rural la…	Article	https://doi.org/10.1139/FACETS-2021-0017	6			1955	1985		https://doi.org/10.1139/FACETS-2021-0017
	Jordaan S.M., Lee J., McClung M.R., Moran M.D.	2021	Quantifying the ecosystem services values of electricity generation in the US Chihuahuan Desert: A life cycle perspective	Journal of Industrial Ecology	Despite increasing attention, the quantification of ecosystem services values in life cycle assessment (LCA) remains nascent relative to other impact categories. In this analysis, we develop and implement a novel approach for quantifying both land requirements and ecosystem services values based on The Economics of Ecosystems and Biodiversity framework. Our case study focuses on energy infrastruc…	Article	https://doi.org/10.1007/s11367-021-01926-w							https://doi.org/10.1007/s11367-021-01926-w
	Kuittinen M., Hautamäki R., Tuhkanen E.-M., Riikonen A., Ariluoma M.	2021	Environmental Product Declarations for plants and soils: how to quantify carbon uptake in landscape design and construction?	International Journal of Life Cycle Assessment	Currently, no clear guidance exists for ISO and EN standards of calculating, verifying, and reporting the climate impacts of plants, mulches, and soils used in landscape design and construction. In order to optimise the potential of ecosystem services in the mitigation of greenhouse gas emissions in the built environment, we unequivocally propose their inclusion when assessing sustainability. We …	Article	https://doi.org/10.3390/su13179963	13	17	9963				https://doi.org/10.3390/su13179963
	Kwon H., Liu X., Xu H., Wang M.	2021	Greenhouse gas mitigation strategies and opportunities for agriculture	Agronomy Journal	To cope with increasing demands for food, feed, and energy along with environmental challenges due to climate change, the agricultural sector has a unique opportunity to meet sustainable development goals set by the United Nations through innovative and regenerative agriculture practices that enhance agricultural productivity, ecosystem services, and human well-being simultaneously. Among many su…	Article	https://doi.org/10.1016/j.ufug.2020.126869	57		126869				https://doi.org/10.1016/j.ufug.2020.126869
	Nicese F.P., Colangelo G., Comolli R., Azzini L., Lucchetti S., Marziliano P.A., Sanesi G.	2021	Estimating CO2 balance through the Life Cycle Assessment prism: A case – Study in an urban park	Urban Forestry and Urban Greening	In a context of progressive urbanization, urban parks can play a pivotal role in carbon sequestration and stock. The study employs Life Cycle Assessment (LCA) to evaluate CO2e (carbon dioxide equivalent) emissions and removal by plants and soil in different urban green typologies, namely afforested areas, tree rows, social allotments, lawns, hedges, referring to a life span of 50 years. The prese…	Article	https://doi.org/10.3389/fsufs.2021.742842	5		742842				https://doi.org/10.3389/fsufs.2021.742842
	Okello M., Lamo J., Ochwo-Ssemakula M., Onyilo F.	2021	Challenges and innovations in achieving zero hunger and environmental sustainability through the lens of sub-Saharan Africa	Outlook on Agriculture	Achieving zero hunger by 2030 often raises the issue of environmental protection or sustainable social development among policy makers due to the environmental footprint of intensifying agricultural production across the continent. Sub-Saharan Africa (SSA) has one of the fastgrowing populations with more than half of the global growth between now and 2050. The challenge now lies in feeding the ev…	Article	https://doi.org/10.3390/w13162165	13	16	2165				https://doi.org/10.3390/w13162165
	Pearlmutter D., Pucher B., Calheiros C.S.C., Hoffmann K.A., Aicher A., Pinho P., Stracqualursi A., Korolova A., Pobric A., Galvão A., Tokuç A., Bas B., Theochari D., Milosevic D., Giancola E., Bertino G., Castellar J.A.C., Flaszynska J., Onur M., Mateo M.C.G., Andreucci M.B., Milousi M., Fonseca M., Di Lonardo S., Gezik V., Pitha U., Nehls T.	2021	Closing water cycles in the built environment through nature‐based solutions: The contribution of vertical greening systems and green roofs	Water (Switzerland)	Water in the city is typically exploited in a linear process, in which most of it is polluted, treated, and discharged; during this process, valuable nutrients are lost in the treatment process instead of being cycled back and used in urban agriculture or green space. The purpose of this paper is to advance a new paradigm to close water cycles in cities via the implementation of nature‐based solu…	Article	https://doi.org/10.3390/su13094886	13	9	4886				https://doi.org/10.3390/su13094886
	Perini K., Magrassi F., Giachetta A., Moreschi L., Gallo M., Del Borghi A.	2021	Environmental sustainability of building retrofit through vertical greening systems: A life-cycle approach	Sustainability (Switzerland)	Urban greening provides a wide range of ecosystem services to address the main challenges of urban areas, e.g., carbon sequestration, evapotranspiration and shade, thermal insulation, and pollution control. This study evaluates the environmental sustainability of a vertical greening system (VGS) built in 2014 in Italy, for which extensive monitoring activities were implemented. The life-cycle ass…	Article	https://doi.org/10.1007/s13280-020-01396-8	50	3		615	630		https://doi.org/10.1007/s13280-020-01396-8
	Roman L.A., Conway T.M., Eisenman T.S., Koeser A.K., Ordóñez Barona C., Locke D.H., Jenerette G.D., Östberg J., Vogt J.	2021	Beyond ‘trees are good’: Disservices, management costs, and tradeoffs in urban forestry	Ambio	The provision of ecosystem services is a prominent rationale for urban greening, and there is a prevailing mantra that ‘trees are good’. However, understanding how urban trees contribute to sustainability must also consider disservices. In this perspective article, we discuss recent research on ecosystem disservices of urban trees, including infrastructure conflicts, health and safety impacts, ae…	Article	https://doi.org/10.1016/j.landusepol.2021.105642	109		105642				https://doi.org/10.1016/j.landusepol.2021.105642
	Ronchi S., Pontarollo N., Serpieri C.	2021	Clustering the built form at LAU2 level for addressing sustainable policies: Insights from the Belgium case study	Land Use Policy	Population growth has determined two different types of urban development: the vertical growth, tending to compactness, and the horizontal one which privileges a more dispersed and sprawled expansion. Those two urban forms have different impacts on environmental sustainability influencing, among others, the microclimate conditions of a city, the energy demand and its economic cost, and the provis…	Article	https://doi.org/10.1016/j.agsy.2021.103242	193		103242				https://doi.org/10.1016/j.agsy.2021.103242
	Rudolf K., Hennings N., Dippold M.A., Edison E., Wollni M.	2021	Improving economic and environmental outcomes in oil palm smallholdings: The relationship between mulching, soil properties and yields	Agricultural Systems	The area under oil palm cultivation has expanded importantly in South-East Asia. The resulting land-use transformations are associated with environmental degradation such as substantial carbon dioxide emissions. Soil conservation practices can contribute to more sustainable oil palm systems by increasing soil organic carbon (SOC) contents and yields. One soil conservation practice in oil palm pla…	Article	https://doi.org/10.1016/j.scitotenv.2020.143880	756		143880				https://doi.org/10.1016/j.scitotenv.2020.143880
	Sillman J., Uusitalo V., Tapanen T., Salonen A., Soukka R., Kahiluoto H.	2021	Contribution of honeybees towards the net environmental benefits of food	Science of the Total Environment	Beekeeping provides honey, protein-containing drone broods and pollen, and yield-increasing pollination services. This study tested the hypothesis that beekeeping can result in net-positive impacts, if pollination services and protein-containing by-products are utilised. As a case example, Finnish beekeeping practices were used. The study was performed using two different approaches. In both appr…	Article	https://doi.org/10.1016/j.jclepro.2021.129291	325		129291				https://doi.org/10.1016/j.jclepro.2021.129291
	Sun T., Feng X., Lal R., Cao T., Guo J., Deng A., Zheng C., Zhang J., Song Z., Zhang W.	2021	Crop diversification practice faces a tradeoff between increasing productivity and reducing carbon footprints	Agriculture, Ecosystems and Environment	Increasing crop biodiversity often increases agro-ecosystem services, however, the effects of crop biodiversity on crop yield and environmental benefits are still unclear. Thus, we conducted a 4-yr field experiment in northeastern China including continuous maize (CM), continuous soybean (CS), maize and soybean rotation (M-S), and maize and soybean intercropping (M/S) to evaluate the crop product…	Article	https://doi.org/10.1111/1365-2664.13968	58	10		2158	2170		https://doi.org/10.1111/1365-2664.13968
	Woods J.S., Verones F., Jolliet O., Vázquez-Rowe I., Boulay A.-M.	2021	A framework for the assessment of marine litter impacts in life cycle impact assessment	Ecological Indicators	Marine litter, mostly plastics, is a growing environmental problem. Environmental decision makers are beginning to take actions and implement regulations that aim to reduce plastic use and waste mismanagement. Nevertheless, life cycle assessment (LCA), a tool commonly used to assist environmental decision making, does not yet allow for considering the consequences of plastic waste leaked into the…	Article	https://doi.org/10.3390/agronomy11091710	11	9	1710				https://doi.org/10.3390/agronomy11091710
	Zimmermann B., Claß-Mahler I., Von Cossel M., Lewandowski I., Weik J., Spiller A., Nitzko S., Lippert C., Krimly T., Pergner I., Zörb C., Wimmer M.A., Dier M., Schurr F.M., Pagel J., Riemenschneider A., Kehlenbeck H., Feike T., Klocke B., Lieb R., Kühne S., Krengel-Horney S., Gitzel J., El-Hasan A., Thomas S., Rieker M., Schmid K., Streck T., Ingwersen J., Ludewig U., Neumann G., Maywald N., Müll…	2021	Mineral-ecological cropping systems—a new approach to improve ecosystem services by farming without chemical synthetic plant protection	Agronomy	The search for approaches to a holistic sustainable agriculture requires the development of new cropping systems that provide additional ecosystem services beyond biomass supply for food, feed, material, and energy use. The reduction of chemical synthetic plant protection products is a key instrument to protect vulnerable natural resources such as groundwater and biodiversity. Together with an op…	Article	https://doi.org/10.1016/j.jclepro.2019.119327	249		119327				https://doi.org/10.1016/j.jclepro.2019.119327
	Alizadeh S., Zafari-koloukhi H., Rostami F., Rouhbakhsh M., Avami A.	2020	The eco-efficiency assessment of wastewater treatment plants in the city of Mashhad using emergy and life cycle analyses	Journal of Cleaner Production	The aim of this study is to evaluate the sustainability of two actual wastewater treatment plants using the eco-efficiency index based on emergy and life cycle analysis. The life cycle analysis is used for environmental investigation to estimate the eco-efficiency index. Moreover, the emergy theory indicating the input and output flows of the ecosystem are applied to assess the sustainability con…	Article	https://doi.org/10.1007/s11367-020-01795-9	25	9		1749	1766		https://doi.org/10.1007/s11367-020-01795-9
	Aung T.S., Fischer T.B., Azmi A.S.	2020	Are large-scale dams environmentally detrimental? Life-cycle environmental consequences of mega-hydropower plants in Myanmar	International Journal of Life Cycle Assessment	Rivers control biophysical processes that underpin essential ecosystem services. Myanmar’s rivers provide great opportunities for increasing energy supply at low costs from hydropower plants and make important contributions to the national economy. However, associated environmental impacts, as well as input and output flows of hydropower developments, remain less well understood. In this paper, w…	Article	https://doi.org/10.1016/j.agsy.2020.102806	181		102806				https://doi.org/10.1016/j.agsy.2020.102806
	Berton M., Bittante G., Zendri F., Ramanzin M., Schiavon S., Sturaro E.	2020	Environmental impact and efficiency of use of resources of different mountain dairy farming systems	Agricultural Systems	In the European Alps traditional, low-input dairy farming systems still coexist with modern high-input intensive systems. This study aimed at evaluating the effect of different Alpine farming systems on the environmental footprint, production efficiency (gross energy conversion ratio, ECR) and competition between feed and food (potentially human-edible gross energy conversion ratio, HeECR). Data …	Article	https://doi.org/10.1007/s11367-020-01730-y	25	7		1259	1277		https://doi.org/10.1007/s11367-020-01730-y
	Bos U., Maier S.D., Horn R., Leistner P., Finkbeiner M.	2020	A GIS based method to calculate regionalized land use characterization factors for life cycle impact assessment using LANCA®	International Journal of Life Cycle Assessment	Land is used and modified in its natural function for the cultivation of food and energy crops, for infrastructure and other production purposes. Despite their global significance, land use impacts are still rarely addressed, although methods for integrating land use into Life Cycle Assessment (LCA) have been developed recently. This paper describes the development and calculation of regionalized…	Article	https://doi.org/10.3390/su12093828	12	9	3828				https://doi.org/10.3390/su12093828
	Bragaglio A., Braghieri A., Pacelli C., Napolitano F.	2020	Environmental impacts of beef as corrected for the provision of ecosystem services	Sustainability (Switzerland)	We aimed to assess whether the environmental impacts in terms of global warming potential (GWP), acidification potential (AP), eutrophication potential (EP), and land occupation (LO) of beef can be decreased when ecosystem and cultural/provisioning services are included in the evaluation. We used four Italian production systems: Fat, with beef imported calves kept in confinement; CoCaI, with beef…	Article	https://doi.org/10.1016/j.scitotenv.2019.136369	712		136369				https://doi.org/10.1016/j.scitotenv.2019.136369
	Briones-Hidrovo A., Uche J., Martínez-Gracia A.	2020	Determining the net environmental performance of hydropower: A new methodological approach by combining life cycle and ecosystem services assessment	Science of the Total Environment	In the face of climate-ecological breakdown, it is well known that the world aims at developing renewable energies in order to replace fossil fuels. However, there is a great concern regarding their environmental-ecological issues specially with those ones that have a deep interplay with its immediate environment such the case of hydropower. Despite efforts, the existing environmental-ecological …	Article	https://doi.org/10.1021/acs.est.9b05153	54	16		9715	9728		https://doi.org/10.1021/acs.est.9b05153
	El Chami D.	2020	Towards sustainable organic farming systems	Sustainability (Switzerland)	The European Union green deal has proposed the “organic farming action plan” to render this farming system more sustainable for climate mitigation and adaptation and to meet the United Nations Sustainable Development Goals (UN-SDGs). While this policy instrument is fundamental to reach sustainable agriculture, there is still no agreement on what sustainable agriculture is and how to measure it. T…	Article	https://doi.org/10.3390/SU12083119	12	8	3119				https://doi.org/10.3390/SU12083119
	Elliot T., Almenar J.B., Rugani B.	2020	Impacts of policy on urban energy metabolism at tackling climate change: The case of Lisbon	Journal of Cleaner Production	Urbanisation and the associated growing climate change burdens pose risks to urban and global climate resilience. Urban greenhouse gas emissions fluctuate over time in response to energy demand, which is influenced by government programmes, economic activity, and demographics. In this research, we investigate the influence of policy on urban energy demand and its consequences on mitigating climat…	Article	https://doi.org/10.1007/s10163-019-00919-0	22	1		133	149		https://doi.org/10.1007/s10163-019-00919-0
	Falahi M., Avami A.	2020	Optimization of the municipal solid waste management system using a hybrid life cycle assessment–emergy approach in Tehran	Journal of Material Cycles and Waste Management	The sustainable design of the waste-management system is of crucial importance for cities like Tehran, capital of Iran. Tehran’s municipal solid-waste management has adopted modern practices and technologies very slowly. This study proposes the optimum pathway to reach maximum environmental benefits as well as the most cost-effective technologies according to the financial limits. The hybrid life…	Article	https://doi.org/10.3390/su12031236	12	3	1236				https://doi.org/10.3390/su12031236
	Fan W., Chen N., Li X., Wei H., Wang X.	2020	Empirical research on the process of land resource-asset-capitalization - A case study of Yanba, Jiangjin district, Chongqing	Sustainability (Switzerland)	As an effective land policy that can invigorate rural construction areas and balance urban and rural development, land tickets not only concretely embody the land resource-asset-capitalization process, but also bring economic benefits to the farmers concerned. However, from the perspective of resource-asset-capitalization, the specific environmental impacts and economic costs of the process in la…	Article	https://doi.org/10.1073/pnas.1920877117	117	36		21968	21977		https://doi.org/10.1073/pnas.1920877117
	Field J.L., Richard T.L., Smithwick E.A.H., Cai H., Laser M.S., LeBauer D.S., Long S.P., Paustian K., Qin Z., Sheehan J.J., Smith P., Wang M.Q., Lynd L.R.	2020	Robust paths to net greenhouse gas mitigation and negative emissions via advanced biofuels	Proceedings of the National Academy of Sciences of the United States of America	Biofuel and bioenergy systems are integral to most climate stabilization scenarios for displacement of transport sector fossil fuel use and for producing negative emissions via carbon capture and storage (CCS). However, the net greenhouse gas mitigation benefit of such pathways is controversial due to concerns around ecosystem carbon losses from land use change and foregone sequestration benefits…	Article	https://doi.org/10.1016/j.jclepro.2019.118362	242		118362				https://doi.org/10.1016/j.jclepro.2019.118362
	Florindo T.J., Bom de Medeiros Florindo G.I., Ruviaro C.F., Pinto A.T.	2020	Multicriteria decision-making and probabilistic weighing applied to sustainable assessment of beef life cycle	Journal of Cleaner Production	Environmental, economic and social aspects of the animal production phase of beef chain have been the focus of individual studies. However, integrated assessments are lacking. Thus, this study aims to develop an approach using sustainable life cycle assessment integrated to multicriteria methods of decision-making and probabilistic weighting in order to evaluate the sustainability of four differe…	Article	https://doi.org/10.1093/jofore/fvaa025	118	5		457	465		https://doi.org/10.1093/jofore/fvaa025
	Fox W., Dwivedi P., Lowe III R.C., Welch S., Fuller M.	2020	Estimating carbon stock of live trees located on the main campus of the university of georgia	Journal of Forestry	We developed a case study for estimating carbon stock (stored and annually sequestered) in aboveground and belowground portions of all the live trees located on the main campus of the University of Georgia. We recorded species, diameter at breast height, and height of trees located between East Broad Street and Carlton Street (north-south direction) and East Campus Road and Lumpkin Street (east-w…	Article	https://doi.org/10.3389/fvets.2020.00651	7		651				https://doi.org/10.3389/fvets.2020.00651
	Geß A., Viola I., Miretti S., Macchi E., Perona G., Battaglini L., Baratta M.	2020	A New Approach to LCA Evaluation of Lamb Meat Production in Two Different Breeding Systems in Northern Italy	Frontiers in Veterinary Science	Lamb meat production provides vital landscape-management and ecosystem services; however, ruminant farming produces a considerable share of the world's greenhouse gas emissions. To measure and compare the advantages and disadvantages of the intensification of livestock farming, an integrative analysis was conducted in this study by combining environmental impact analysis and animal welfare assess…	Article	https://doi.org/10.1007/s13280-020-01326-8	49	10		1629	1638		https://doi.org/10.1007/s13280-020-01326-8
	Kamino L.H.Y., Pereira E.O., do Carmo F.F.	2020	Conservation paradox: Large-scale mining waste in protected areas in two global hotspots, southeastern Brazil	Ambio	Irreversible losses of natural areas and damage to ecosystem services are caused by large-scale mining. These effects are prominent in Minas Gerais, which is home to a mining industry with hundreds of tailings dams concentrated in global hotspots: the Cerrado and the Atlantic Forest. We present an overview of the spatial overlap between protected areas (PAs), priority conservation areas (PCAs), t…	Article	https://doi.org/10.1016/j.scitotenv.2020.141278	747		141278				https://doi.org/10.1016/j.scitotenv.2020.141278
	Liu X., Bakshi B.R., Rugani B., de Souza D.M., Bare J., Johnston J.M., Laurent A., Verones F.	2020	Quantification and valuation of ecosystem services in life cycle assessment: Application of the cascade framework to rice farming systems	Science of the Total Environment	The integration of ecosystem service (ES) assessment with life cycle assessment (LCA) is important for developing decision support tools for environmental sustainability. A prequel study has proposed a 4-step methodology that integrates the ES cascade framework within the cause-effect chain of life cycle impact assessment (LCIA) to characterize the physical and monetary impacts on ES provisioning…	Article	https://doi.org/10.3390/app10020622	10	2	622				https://doi.org/10.3390/app10020622
	Mora M.A.M., Bravo R.D.M., Baril C.F., Hernández M.F., Delgadillo S.A.M.	2020	An integrated approach to determining the capacity of ecosystems to supply ecosystem services into life cycle assessment for a carbon capture system	Applied Sciences (Switzerland)	In the life cycle assessment (LCA) method, it is not possible to carry out an integrated sustainability analysis because the quantification of the biophysical capacity of the ecosystems to supply ecosystem services is not taken into account. This paper considers a methodological proposal connecting the flow demand of a process or system product from the technosphere and the feasibility of the eco…	Article	https://doi.org/10.1016/j.jenvman.2019.109689	253		109689				https://doi.org/10.1016/j.jenvman.2019.109689
	Norton D.A., Suryaningrum F., Buckley H.L., Case B.S., Hamish Cochrane C., Forbes A.S., Harcombe M.	2020	Achieving win-win outcomes for pastoral farming and biodiversity conservation in New Zealand	New Zealand Journal of Ecology	Pastoral farming is the dominant land use in New Zealand today and is under considerable domestic social and political pressure to reduce its environmental footprint. In this article, we explore options to enhance native biodiversity conservation within New Zealand pastoral systems. We argue that there is strong synergistic interdependence between biodiversity conservation and pastoral farming an…	Article	https://doi.org/10.1111/jiec.12946	24	3		485	499		https://doi.org/10.1111/jiec.12946
	Raymond A.J., Tipton J.R., Kendall A., DeJong J.T.	2020	Review of impact categories and environmental indicators for life cycle assessment of geotechnical systems	Journal of Industrial Ecology	Life cycle assessment (LCA) has only had limited application in the geotechnical engineering discipline, though it has been widely applied to civil engineering systems such as pavements and roadways. A review of previous geotechnical LCAs showed that most studies have tracked a small set of impact categories, such as energy and global warming potential. Accordingly, currently reported environment…	Article	https://doi.org/10.3389/fsufs.2020.544984	4		544984				https://doi.org/10.3389/fsufs.2020.544984
	Rowntree J.E., Stanley P.L., Maciel I.C.F., Thorbecke M., Rosenzweig S.T., Hancock D.W., Guzman A., Raven M.R.	2020	Ecosystem Impacts and Productive Capacity of a Multi-Species Pastured Livestock System	Frontiers in Sustainable Food Systems	Regenerative agriculture is a newly codified approach to agriculture that emphasizes reducing reliance on exogeneous inputs, as well as restoring and enhancing ecosystem services such as soil carbon (C) sequestration. These regenerative agriculture principles suggest that modern livestock systems can be redesigned to better capitalize on animals' ecological niche as biological up cyclers and may …	Article	https://doi.org/10.1016/j.ecolind.2019.105859	109		105859				https://doi.org/10.1016/j.ecolind.2019.105859
	Santagata R., Zucaro A., Viglia S., Ripa M., Tian X., Ulgiati S.	2020	Assessing the sustainability of urban eco-systems through Emergy-based circular economy indicators	Ecological Indicators	Circular Economy (CE) concepts and tools are getting increasing attention with regard to their implementation in agricultural, urban and industrial sectors towards innovative business models to optimize resource use, process performances and development policies. However, conventional biophysical and economic indicators hardly fit CE characteristics. Life cycle assessment, footprint and economic …	Article	https://doi.org/10.3390/su12187521	12	18	7521				https://doi.org/10.3390/su12187521
	Stavi I.	2020	On-site use of plant litter and yard waste as mulch in gardening and landscaping systems	Sustainability (Switzerland)	Plant litter, such as fallen leaves, branch trimmings, and other yard waste, plays important roles in both natural and man-made ecosystems. However, due to common aesthetic perceptions, land-owners or managers of many residential gardening and municipal landscaping systems consider these organic residues a burden, and therefore, clear them from the ground and dispose of them off-site. The removal…	Article	https://doi.org/10.3390/su12010367	12	1	367				https://doi.org/10.3390/su12010367
	Wang Y., Ni Z., Hu M., Li J., Wang Y., Lu Z., Chen S., Xia B.	2020	Environmental performances and energy efficiencies of various urban green infrastructures: A life-cycle assessment	Journal of Cleaner Production	Urban green infrastructures have been well recognized for their roles in providing ecosystem services in cities. However, their environmental performances have not been fully understood from a life-cycle perspective. In this study, we evaluated the life-cycle environmental performances and energy efficiencies of three types of green infrastructure, i.e. green roof, greenway, and grove that are in…	Article	https://doi.org/10.1016/j.jclepro.2019.05.284	231			714	722		https://doi.org/10.1016/j.jclepro.2019.05.284
	Alejandre E.M., van Bodegom P.M., Guinée J.B.	2019	Towards an optimal coverage of ecosystem services in LCA	Journal of Cleaner Production	Our society relies on the sustained provisioning of ecosystem services (ES), while such provisioning has been negatively affected by human activities. Recently, several authors proposed indicators for the assessment of ES in Life Cycle Assessment (LCA) studies and developed corresponding characterization factors for integration in the impact assessment phase of LCA (LCIA). However, the vast major…	Article	https://doi.org/10.1016/j.foreco.2018.08.047	432			17	29		https://doi.org/10.1016/j.foreco.2018.08.047
	Arifanti V.B., Kauffman J.B., Hadriyanto D., Murdiyarso D., Diana R.	2019	Carbon dynamics and land use carbon footprints in mangrove-converted aquaculture: The case of the Mahakam Delta, Indonesia	Forest Ecology and Management	Mangroves provide a number of important ecosystem services to humanity but their persistence is threatened from deforestation, conversion, and climate change. The Mahakam Delta was once among the largest mangrove forests in Southeast Asia comprising 2% of Indonesia's total mangroves. Currently, about 62% of this extensive mangrove in the Mahakam Delta has been lost mainly due to conversion into a…	Article	https://doi.org/10.1111/raq.12231	11	1		149	167		https://doi.org/10.1111/raq.12231
	Bais-Moleman A.L., Schulp C.J.E., Verburg P.H.	2019	Assessing the environmental impacts of production- and consumption-side measures in sustainable agriculture intensification in the European Union	Geoderma	Sustainable agricultural intensification (SI) is an important strategy to respond to the combined challenge of achieving food security and providing public goods and ecosystem services to society, including mitigation and adaptation of climate change. Sustainable intensification includes a wide range of measures at both the supply and demand-side of agricultural production. However, currently, it…	Article	https://doi.org/10.1007/s11367-018-1458-4	24	3		419	440		https://doi.org/10.1007/s11367-018-1458-4
	Bidoglio G., Berger M., Finkbeiner M.	2019	An environmental assessment of small hydropower in India: the real costs of dams’ construction under a life cycle perspective	International Journal of Life Cycle Assessment	In the last years, India has taken a number of initiatives to boost small hydropower development based on the assumption of being a green energy source with only limited disturbances on the social and natural environments. However, its real environmental performances have not been examined. The intention of this paper is to evaluate the potential environmental impacts of Small Hydropower Plants (…	Article	https://doi.org/10.1016/j.aquaculture.2018.https://doi.org/10.019	501			404	415		https://doi.org/10.1016/j.aquaculture.2018.https://doi.org/10.019
	Biermann G., Geist J.	2019	Life cycle assessment of common carp (Cyprinus carpio L.) – A comparison of the environmental impacts of conventional and organic carp aquaculture in Germany	Aquaculture	The steadily growing aquaculture industry has been blamed for increasing environmental impacts at local and global levels. The greatest increase in production is expected for freshwater fish, such as carp and related species. Decisions on sustainable environmental management strategies in aquaculture should be based on quantitative analyses of their environmental impacts. In this study, Life Cycl…	Article	https://doi.org/10.1016/j.scitotenv.2019.133841	695		133841				https://doi.org/10.1016/j.scitotenv.2019.133841
	Boone L., Roldán-Ruiz I., Van linden V., Muylle H., Dewulf J.	2019	Environmental sustainability of conventional and organic farming: Accounting for ecosystem services in life cycle assessment	Science of the Total Environment	Today, there is an ongoing debate about the environmental sustainability of the products of organic farming. To compare the performance of conventional and organic farming systems regarding environmental impact and productivity, the comprehensive environmental assessment tool ‘life cycle assessment’ can be used. The lower crop yields attained by organic systems compared to conventional farming sy…	Article	https://doi.org/10.1089/ees.2018.0433	36	7		763	777		https://doi.org/10.1089/ees.2018.0433
	Bozeman J.F., Ashton W.S., Theis T.L.	2019	Distinguishing Environmental Impacts of Household Food-Spending Patterns Among U.S. Demographic Groups	Environmental Engineering Science	The food-energy-water (FEW) nexus is a focal point in research due to its impacts on ecosystem services that sustain human life. Despite this, FEW studies have not produced enough policy-relevant insights, particularly addressing differences across demographic groups with sufficient data and analysis. We addressed this research gap by integrating socioeconomic status (SES) with pertinent life cyc…	Article	https://doi.org/10.1016/j.buildenv.2019.04.014	158			133	144		https://doi.org/10.1016/j.buildenv.2019.04.014
	Brachet A., Schiopu N., Clergeau P.	2019	Biodiversity impact assessment of building's roofs based on Life Cycle Assessment methods	Building and Environment	To fight against the biodiversity loss and to take advantage of ecosystem services that nature can offer, urban planners integrate green spaces in urban projects. However to assess green spaces, attention is generally paid to local biodiversity (i.e. “in situ”)which concerns the plot on which buildings are constructed. The biodiversity impacted outside the construction site (i.e. “ex situ”)which …	Article	https://doi.org/10.1007/s11367-019-01583-0	24	9		1653	1674		https://doi.org/10.1007/s11367-019-01583-0
	Bulle C., Margni M., Patouillard L., Boulay A.-M., Bourgault G., De Bruille V., Cao V., Hauschild M., Henderson A., Humbert S., Kashef-Haghighi S., Kounina A., Laurent A., Levasseur A., Liard G., Rosenbaum R.K., Roy P.-O., Shaked S., Fantke P., Jolliet O.	2019	IMPACT World+: a globally regionalized life cycle impact assessment method	International Journal of Life Cycle Assessment	This paper addresses the need for a globally regionalized method for life cycle impact assessment (LCIA), integrating multiple state-of-the-art developments as well as damages on water and carbon areas of concern within a consistent LCIA framework. This method, named IMPACT World+, is the update of the IMPACT 2002+, LUCAS, and EDIP methods. This paper first presents the IMPACT World+ novelties an…	Article	https://doi.org/10.3832/ifor2578-011	12	1		85	91		https://doi.org/10.3832/ifor2578-011
	Crous-Duran J., Graves A.R., Garcia-De-Jalón S., Paulo J.A., Tomé M., Palma J.H.N.	2019	Assessing food sustainable intensification potential of agroforestry using a carbon balance method	IForest	Food security, climate change mitigation, and land use challenges are interlinked and need to be considered simultaneously. One possible solution is sustainable intensification, which is the practice of increasing food production per area of land whilst also reducing the environmental impacts associated with this. Agroforestry has been stated to be a practice that meets this definition. In this s…	Article	https://doi.org/10.1016/j.scitotenv.2019.01.268	662			703	713		https://doi.org/10.1016/j.scitotenv.2019.01.268
	Dominati E.J., Maseyk F.J.F., Mackay A.D., Rendel J.M.	2019	Farming in a changing environment: Increasing biodiversity on farm for the supply of multiple ecosystem services	Science of the Total Environment	Among natural resources, soils continue to be poorly represented in ecosystem services frameworks and decision-making processes. Similarly, the supply of multiple ecosystem services from agro-ecosystems and trade-offs between services remains under-researched. As a consequence, it is unclear how and to what extent agriculture can deliver on environmental sustainability, whilst maintaining current…	Article	https://doi.org/10.21660/2019.60.4703	17	60	4703				https://doi.org/10.21660/2019.60.4703
	Ito H., Aimono K., Fujii T.	2019	Life cycle impact assessment of new ground material and embankment construction methods considering recycling	International Journal of GEOMATE	In Japan, the conventional cut-and-fill method is often used in banking construction methods. However, this construction method is pointed out that it causes land subsidence and/or landslide in soft ground. For solving these problems, various new construction methods using the ground materials such as EPS (styrofoam), recycled foamed waste glass and expanded polystyrene beads have been developed …	Article	https://doi.org/10.2134/agronj2018.03.0207	111	1		93	98		https://doi.org/10.2134/agronj2018.03.0207
	Karlen D.L., Schmer M.R., Kaffka S., Clay D.E., Wang M.Q., Horwath W.R., Kendall A., Keller A., Pieper B.J., Unnasch S., Darlington T., Vocasek F., Chute A.G.	2019	Unraveling crop residue harvest effects on soil organic carbon	Agronomy Journal	Crop residues protect soil resources, sustain soil organic carbon (SOC), cycle nutrients, support microbial communities, and provide bioenergy feedstock. Herein we (i) summarize the origin of the “Crop Residues for Advanced Biofuels: Effects on Soil Carbon” workshop; (ii) review the workshop structure; and (iii) present consensus points, unanswered questions, and outcomes of the workshop. Initiat…	Article	https://doi.org/10.3390/ijerph16050827	16	5	827				https://doi.org/10.3390/ijerph16050827
	Liu D., Zou C., Xu M.	2019	Environmental, ecological, and economic benefits of biofuel production using a constructed wetland: A case study in China	International Journal of Environmental Research and Public Health	Here we show a constructed wetland (CW), a viable alternative wastewater treatment system, be used to produce biofuels from biomass by using nitrogen contained in domestic wastewater. We summarize the potential biomass yield evaluated as cellulosic ethanol bioenergy production, and combine the life cycle analysis with a mass balance approach to estimate the energetic, environmental, and economic …	Article	https://doi.org/10.1111/jiec.12755	23	2		347	360		https://doi.org/10.1111/jiec.12755
	Liu X., Bakshi B.R.	2019	Ecosystem Services in Life Cycle Assessment while Encouraging Techno-Ecological Synergies	Journal of Industrial Ecology	Life cycle assessment (LCA) has enabled consideration of environmental impacts beyond the narrow boundary of traditional engineering methods. This reduces the chance of shifting impacts outside the system boundary. However, sustainability also requires that supporting ecosystems are not adversely affected and remain capable of providing goods and services for supporting human activities. Conventi…	Article	https://doi.org/10.2478/rtuect-2019-0066	23	2		238	257		https://doi.org/10.2478/rtuect-2019-0066
	Lucchetti M.G., Paolotti L., Rocchi L., Boggia A.	2019	The Role of Environmental Evaluation within Circular Economy: An Application of Life Cycle Assessment (LCA) Method in the Detergents Sector	Environmental and Climate Technologies	The present work aims to analyse the environmental advantages of a production process that applies circular economy. The study examines a product that is generated through the use of a certain percentage of recovered secondary materials, thus helping to avoid impacts related to the disposal of these materials and preserving the ecosystems from indiscriminate excessive natural resources extraction…	Article	https://doi.org/10.3390/su11051396	11	5	1396				https://doi.org/10.3390/su11051396
	Marín T., Wu J., Wu X., Ying Z., Lu Q., Hong Y., Wang X., Yang W.	2019	Resource use in mariculture: A case study in Southeastern China	Sustainability (Switzerland)	China is the biggest provider of aquaculture products, and the industry is still growing rapidly. Further development of the sector will affect the provision of ecosystem services that maintain the livelihood of local populations. In particular, the current size and growth rate of China's mariculture has raised many environmental concerns, but very few studies of this sector have been conducted t…	Article	https://doi.org/10.1016/j.worlddev.2019.06.003	122			339	348		https://doi.org/10.1016/j.worlddev.2019.06.003
	Martinelli G.D.C., Schlindwein M.M., Padovan M.P., Vogel E., Ruviaro C.F.	2019	Environmental performance of agroforestry systems in the Cerrado biome, Brazil	World Development	Agriculture and land use practices must be significantly improved to satisfy the needs of future generations without placing further pressure on global ecosystems. Agroforestry systems (AFS) have been quoted as one of the best options to mitigate environmental impacts and at the same time, improve smallholders’ livelihoods in agricultural areas. However, studies investigating the environmental as…	Article	https://doi.org/10.21894/jopr.2019.0040	31	3		468	479		https://doi.org/10.21894/jopr.2019.0040
	Mistretta M., Caputo P., Cellura M., Cusenza M.A.	2019	Energy and environmental life cycle assessment of an institutional catering service: An Italian case study	Science of the Total Environment	Food production is recognised as one of the major drivers for global environmental pressure. In the last years, changes in consumption models result in an increasing population consuming food out of home that pose the catering service sector at the centre of the European Union policies aimed at improving the environmental sustainability of the food sector. In this framework, better technical know…	Article	https://doi.org/10.1016/j.apenergy.2019.01.117	238			1484	1496		https://doi.org/10.1016/j.apenergy.2019.01.117
	Nguyen T.H., Granger J., Pandya D., Paustian K.	2019	High-resolution multi-objective optimization of feedstock landscape design for hybrid first and second generation biorefineries	Applied Energy	Biofuels have been proposed as a potential solution for climate change mitigation. However, there exist several barriers, such as “food vs fuel” issues and technological constraints, restricting the sustainable commercialization of both first- and second-generation biofuels. Combining arable crops and their residues for hybrid first- and second-generation biofuel production provides opportunities…	Article	https://doi.org/10.1016/j.scitotenv.2019.07.180	693		133374				https://doi.org/10.1016/j.scitotenv.2019.07.180
	Othoniel B., Rugani B., Heijungs R., Beyer M., Machwitz M., Post P.	2019	An improved life cycle impact assessment principle for assessing the impact of land use on ecosystem services	Science of the Total Environment	In order to consider the effects of land use, and the land cover changes it causes, on ecosystem services in life cycle assessment (LCA), a new methodology is proposed and applied to calculate midpoint and endpoint characterization factors. To do this, a cause-effect chain was established in line with conceptual models of ecosystem services to describe the impacts of land use and related land cov…	Article	https://doi.org/10.1093/jas/skz035	97	4		1865	1873		https://doi.org/10.1093/jas/skz035
	Philipp D., Putman B., Thoma G.	2019	ASAS-CSAS annual meeting symposium on water use efficiency at the forage-animal interface: Life cycle assessment of forage-based livestock production systems	Journal of Animal Science	Livestock production is increasingly subjected to environmental and economic challenges related to water quantities being utilized, expressed as green (evapotranspiration from rainwater), blue (surface and groundwater), or gray (waste) water footprints at each stage of the product life cycle. Published data indicated that the largest share of water being used for producing beef in the United Stat…	Article	https://doi.org/10.1016/j.rser.2018.12.043	103			58	70		https://doi.org/10.1016/j.rser.2018.12.043
	Ridoutt B., Motoshita M., Pfister S.	2019	An LCA impact assessment model linking land occupation and malnutrition-related DALYs	International Journal of Life Cycle Assessment	So far, land occupation impact assessment models in life-cycle assessment have predominantly considered biodiversity, ecosystem quality and ecosystem services. However, in a manner similar to water consumption, land occupation has the potential to impact food production and thereby human health. In this study, the impact pathway linking land occupation and protein-energy malnutrition was modelled…	Article	https://doi.org/10.1016/j.jclepro.2018.11.152	211			36	43		https://doi.org/10.1016/j.jclepro.2018.11.152
	Rodrigues J., Gérard A., Séré G., Morel J.-L., Guimont S., Simonnot M.-O., Pons M.-N.	2019	Life cycle impacts of soil construction, an innovative approach to reclaim brownfields and produce nonedible biomass	Journal of Cleaner Production	The objective of the LORVER project was the construction of fertile Technosols on an industrial brownfield using wastes and byproducts to produce biomass for industrial purposes (hemp as a fiber source and poplar for short rotation coppice). A Life Cycle Assessment (LCA) of the Technosol construction was conducted to highlight the most significant environmental contributions. Three scenarios were…	Article	https://doi.org/10.1016/j.scitotenv.2019.07.023	690			1284	1298		https://doi.org/10.1016/j.scitotenv.2019.07.023
	Rugani B., Maia de Souza D., Weidema B.P., Bare J., Bakshi B., Grann B., Johnston J.M., Pavan A.L.R., Liu X., Laurent A., Verones F.	2019	Towards integrating the ecosystem services cascade framework within the Life Cycle Assessment (LCA) cause-effect methodology	Science of the Total Environment	The assessment of ecosystem services (ES) is covered in a fragmented manner by environmental decision support tools that provide information about the potential environmental impacts of supply chains and their products, such as the well-known Life Cycle Assessment (LCA) methodology. Within the flagship project of the Life Cycle Initiative (hosted by UN Environment), aiming at global guidance for …	Article	https://doi.org/10.1016/j.scitotenv.2018.11.440	657			517	534		https://doi.org/10.1016/j.scitotenv.2018.11.440
	Teixeira H., Lillebø A.I., Culhane F., Robinson L., Trauner D., Borgwardt F., Kummerlen M., Barbosa A., McDonald H., Funk A., O'Higgins T., Van der Wal J.T., Piet G., Hein T., Arévalo-Torres J., Iglesias-Campos A., Barbière J., Nogueira A.J.A.	2019	Linking biodiversity to ecosystem services supply: Patterns across aquatic ecosystems	Science of the Total Environment	Global initiatives have been increasingly focusing on mainstreaming the values of biodiversity and ecosystem services into decision-making at all levels. Due to the accelerated rate at which biodiversity is declining and its consequences for the functioning of ecosystems and subsequently, the services they provide, there is need to develop comprehensive assessments of the services and the benefit…	Article	https://doi.org/10.1016/j.scitotenv.2019.133642	693		133642				https://doi.org/10.1016/j.scitotenv.2019.133642
	Augstburger H., Jacobi J., Schwilch G., Rist S.	2018	Agroecosystem service capacity index - A methodological approach	Landscape Online	Sustainable food systems (FS) require providing food and other goods and services to humans satisfying food security, right to food, income, social justice and resilience, without degrading human health and hiving high environmental performance. The environmental performance of FS can be evaluated using Life Cycle Assessment. However, research on the impact that FS activities, e.g. crop productio…	Article	https://doi.org/10.1021/acssuschemeng.7b03953	6	3		3632	3639		https://doi.org/10.1021/acssuschemeng.7b03953
	Bakshi B.R., Gutowski T.G., Sekulic D.P.	2018	Claiming Sustainability: Requirements and Challenges	ACS Sustainable Chemistry and Engineering	Despite the strong desire to find solutions that enable sustainable development, understanding of the requirements that methods must satisfy to guide technological development toward sustainability is still quite limited. We address this challenge based on a meta-principle for sustainability: human activities should not exceed critical ecosystem capacity, and by translating this principle into si…	Article	https://doi.org/10.1016/j.esd.2017.09.007	42			14	23		https://doi.org/10.1016/j.esd.2017.09.007
	Baumert S., Khamzina A., Vlek P.L.G.	2018	Greenhouse gas and energy balance of Jatropha biofuel production systems of Burkina Faso	Energy for Sustainable Development	Jatropha curcas has been introduced as a low-cost energy crop in Burkina Faso for the production of straight vegetable oil (SVO) and biodiesel. It is cultivated in different plantation systems including smallholder inter-plantings with annual crops, large-scale monoculture, afforestation on marginal land, in traditional hedge systems along contour stone walls, and in living fences. We performed L…	Article	https://doi.org/10.1016/j.ecoser.2017.11.011	30			211	219		https://doi.org/10.1016/j.ecoser.2017.11.011
	Blanco C.F., Marques A., van Bodegom P.M.	2018	An integrated framework to assess impacts on ecosystem services in LCA demonstrated by a case study of mining in Chile	Ecosystem Services	Life Cycle Assessment (LCA) is a tool to quantitatively assess the environmental impacts associated to a product's life cycle. Since its conception, LCA has improved considerably in sophistication and scope. Yet efforts to incorporate ecosystem services (ES) are still at an early stage. We present a novel framework for assessing ES in LCA that integrates models from adjacent fields and partitions…	Article	https://doi.org/10.1016/j.jclepro.2017.03.078	172			4033	4043		https://doi.org/10.1016/j.jclepro.2017.03.078
	Bragaglio A., Napolitano F., Pacelli C., Pirlo G., Sabia E., Serrapica F., Serrapica M., Braghieri A.	2018	Environmental impacts of Italian beef production: A comparison between different systems	Journal of Cleaner Production	Livestock production, particularly beef supply chain, is charged as the major contributor to green-house gas (GHG) emissions, as well as, in land degradation and deforestation. Environmental impacts per kg of edible beef, however, vary largely due to differences in beef production systems. Thus, this study aimed to compare the cradle-to-farm gate sustainability of four different Italian beef prod…	Article	https://doi.org/10.1139/er-2017-0080	26	2		214	229		https://doi.org/10.1139/er-2017-0080
	D'Eusanio M., Serreli M., Zamagni A., Petti L.	2018	Assessment of social dimension of a jar of honey: A methodological outline	Journal of Cleaner Production	Honey is a natural sweetener that requires minimal industrial technologies and is the subject of thriving markets along with its derived products. It has been estimated that about 35% of food consumption depends directly on the pollination of fruit and vegetable crops. A Social Life Cycle Assessment (S-LCA) case-study is applied in the agro-food sector to assess the social and socio-economic aspe…	Article	https://doi.org/10.1016/j.jclepro.2017.08.062	172			3634	3643		https://doi.org/10.1016/j.jclepro.2017.08.062
	Fiore A., Lardo E., Montanaro G., Laterza D., Loiudice C., Berloco T., Dichio B., Xiloyannis C.	2018	Mitigation of global warming impact of fresh fruit production through climate smart management	Journal of Cleaner Production	The purpose of the study was to investigate the influence of management practices on the global warming impact of some perennial fruit crops. The global warming potential (GWP) of single operations during a fresh fruit production under local conventional management (Cmng) and the mitigation potential of introducing sustainable management practices (Smng) were assessed. A life cycle assessment ana…	Article	https://doi.org/10.17660/ActaHortic.2018.1191.19	1191			139	144		https://doi.org/10.17660/ActaHortic.2018.1191.19
	Ingram D.L., Hall C.R., Knight J.	2018	Carbon footprint and ecosystem services during the life cycle of woody landscape plants	Acta Horticulturae	Horticultural crop producers and marketers are increasingly adopting sustainable practices. A sustainable system is often described as being environmentally, economically, and socially sustainable. With a maturing nursery industry, economic sustainability is important and the industry has traditionally sought ways to minimize environmental impacts from production while increasing efficiency to ma…	Article	https://doi.org/10.1007/s11367-017-1332-9	23	5		1078	1090		https://doi.org/10.1007/s11367-017-1332-9
	Järviö N., Henriksson P.J.G., Guinée J.B.	2018	Including GHG emissions from mangrove forests LULUC in LCA: a case study on shrimp farming in the Mekong Delta, Vietnam	International Journal of Life Cycle Assessment	Mangrove forests have been recognized as important regulators of greenhouse gases (GHGs), yet the resulting land use and land-use change (LULUC) emissions have rarely been accounted for in life cycle assessment (LCA) studies. The present study therefore presents up-to-date estimates for GHG emissions from mangrove LULUC and applies them to a case study of shrimp farming in Vietnam. Methods: To es…	Article	https://doi.org/10.1016/j.scitotenv.2018.07.088	645			51	59		https://doi.org/10.1016/j.scitotenv.2018.07.088
	Jeswani H.K., Hellweg S., Azapagic A.	2018	Accounting for land use, biodiversity and ecosystem services in life cycle assessment: Impacts of breakfast cereals	Science of the Total Environment	This study considers the life cycle impacts of land use on biodiversity and ecosystem services associated with the production of a ubiquitous food type: breakfast cereals. For biodiversity, the impacts on five taxonomic groups have been assessed: mammals, birds, vascular plants, amphibians and reptiles. For ecosystem services, the potential loss in the following ecosystem services of soil has bee…	Article	https://doi.org/10.1016/j.jclepro.2017.05.092	172			3874	3889		https://doi.org/10.1016/j.jclepro.2017.05.092
	Karabulut A.A., Crenna E., Sala S., Udias A.	2018	A proposal for integration of the ecosystem-water-food-land-energy (EWFLE) nexus concept into life cycle assessment: A synthesis matrix system for food security	Journal of Cleaner Production	Ensuring secure access to food and energy worldwide relies on win-win share of sectoral use of constrained natural resources such as land and water, taking also into account the crucial role of ecosystems and their services. The increase in global population and the related growing demand for food and other services are exerting unsustainable pressures on natural resources, compromising their use…	Article	https://doi.org/10.1016/j.ecolind.2018.06.018	93			1126	1135		https://doi.org/10.1016/j.ecolind.2018.06.018
	Liang L., Lal R., Ridoutt B.G., Zhao G., Du Z., Li L., Feng D., Wang L., Peng P., Hang S., Wu W.	2018	Multi-indicator assessment of a water-saving agricultural engineering project in North Beijing, China	Agricultural Water Management	The Paddy Land-to-Dry Land (PLDL) program was a 10-year long (2006–2015) agricultural engineering program, initiated jointly by Beijing and Heibei Province, that was designed to increase urban water availability and improve household livelihoods in local farming communities. The program, supported by government subsidy, involved conversion of paddy (Oryza sativa) to maize (Zea mays). In this stud…	Article	https://doi.org/10.1016/j.ecolind.2018.03.087	91			268	277		https://doi.org/10.1016/j.ecolind.2018.03.087
	Liu W., Yan Y., Wang D., Ma W.	2018	Integrate carbon dynamics models for assessing the impact of land use intervention on carbon sequestration ecosystem service	Ecological Indicators	The land use intervention caused a noticeable impact on carbon sequestration as an ecosystem service. To comprehensively project land use change impact on carbon sequestration, the carbon dynamics models in the ecosystem and the atmosphere were integrated, and characterization factors were calculated for different scenarios. In this study, to illustrate the proposed method, the CENTURY model was …	Article	https://doi.org/10.1016/j.jclepro.2018.05.283	197			772	780		https://doi.org/10.1016/j.jclepro.2018.05.283
	Liu X., Ziv G., Bakshi B.R.	2018	Ecosystem services in life cycle assessment - Part 2: Adaptations to regional and serviceshed information	Journal of Cleaner Production	Regionalized life cycle assessment (LCA) is receiving more attention among LCA practitioners due to spatial variation in process efficiency of technological systems and current status of ecological systems. However, the role of ecosystem services (ES) in supporting technological activities is still ignored. Techno-Ecological Synergies in Life Cycle Assessment (TES-LCA) is a methodology that captu…	Article	https://doi.org/10.1016/j.jclepro.2018.06.164	197			314	322		https://doi.org/10.1016/j.jclepro.2018.06.164
	Liu X., Ziv G., Bakshi B.R.	2018	Ecosystem services in life cycle assessment - Part 1: A computational framework	Journal of Cleaner Production	Explicit inclusion of the role of ecosystems in life cycle assessment (LCA) is needed to prevent the selection of alternatives that depend on or degrade scarce ecosystem services (ES), and to help identify opportunities for enhancing sustainability by not just reducing impact but also protecting and restoring ecosystems and the diverse goods and services they supply. Various approaches have been …	Article	https://doi.org/10.1016/j.ecoser.2018.02.014	30			200	210		https://doi.org/10.1016/j.ecoser.2018.02.014
	Meyer M.A., Leckert F.S.	2018	A systematic review of the conceptual differences of environmental assessment and ecosystem service studies of biofuel and bioenergy production	Biomass and Bioenergy	National or supranational policies such as the EU Renewable Energy Directive (EU RED) prescribe both the assessment of the environmental impacts of biofuel and bioenergy production, as well as their impact on ecosystem services (ESS). However, it is not clear what differentiates environmental assessment (EA) and ESS studies. Therefore, we conducted a systematic review and compared ESS and EA stud…	Article	https://doi.org/10.1016/j.jclepro.2018.05.061	192			864	876		https://doi.org/10.1016/j.jclepro.2018.05.061
	Morais T.G., Silva C., Jebari A., Álvaro-Fuentes J., Domingos T., Teixeira R.F.M.	2018	A proposal for using process-based soil models for land use Life cycle impact assessment: Application to Alentejo, Portugal	Journal of Cleaner Production	Human occupation and transformation of land are a root cause of ecosystem services degradation. For example, land use (LU) and land use change (LUC) are drivers of soil organic carbon (SOC) change, decreasing the biotic production potential of soils. In Life Cycle Assessment (LCA) there is a growing trend towards accurate and regionalized impact assessment of LU∖LUC. Available impact assessment m…	Article	https://doi.org/10.1007/s11284-017-1534-4	33	1		35	49		https://doi.org/10.1007/s11284-017-1534-4
	Nakaoka M., Sudo K., Namba M., Shibata H., Nakamura F., Ishikawa S., Makino M., Yamano H., Matsuzaki S.-I.S., Yamakita T., Yu X., Hou X., Li X., Brodie J., Kanemoto K., Moran D., Verones F.	2018	TSUNAGARI: a new interdisciplinary and transdisciplinary study toward conservation and sustainable use of biodiversity and ecosystem services	Ecological Research	The expanding economical activities have accelerated losses of biodiversity and ecosystem services, which are especially pronounced in Asia. To find solutions to stop these losses, a group of scientists studying both ecological and social sciences has launched an interdisciplinary research network, entitled TSUNAGARI (Trans-System, UNified Approach for Global and Regional Integration of social-ec…	Article	https://doi.org/10.1016/j.scitotenv.2018.06.191	643			1337	1347		https://doi.org/10.1016/j.scitotenv.2018.06.191
	Pavan A.L.R., Ometto A.R.	2018	Ecosystem Services in Life Cycle Assessment: A novel conceptual framework for soil	Science of the Total Environment	Ecosystem Services (ES) are the direct and indirect contributions of ecosystems to human well-being, which include provision of food and water, regulation of flood and erosion processes, soil formation and non-material benefits such as recreation. The integration of ES impact modeling in Life Cycle Assessment (LCA) still has limitations regarding the typology embodied and some conceptual errors i…	Article	https://doi.org/10.3390/su10040998	10	4	998				https://doi.org/10.3390/su10040998
	Petit-Boix A., Apul D.	2018	From cascade to bottom-up ecosystem services model: How does social cohesion emerge from urban agriculture?	Sustainability (Switzerland)	Given the expansion of urban agriculture (UA), we need to understand how this system provides ecosystem services, including foundational societal needs such as social cohesion, i.e., people's willingness to cooperate with one another. Although social cohesion in UA has been documented, there is no framework for its emergence and how it can be modeled within a sustainability framework. In this stu…	Article	https://doi.org/10.3390/su10030630	10	3	630				https://doi.org/10.3390/su10030630
	Teixeira R.F.M., Morais T.G., Domingos T.	2018	A practical comparison of regionalized land use and biodiversity life cycle impact assessment models using livestock production as a case study	Sustainability (Switzerland)	Land use is increasingly important for impact assessment in life cycle assessment (LCA). Its impacts on biodiversity and provision of ecosystem services are crucial to depict the environmental performance of products. Life cycle impact assessment (LCIA) models are commonly selected by consensus through processes frequently misinformed by the absence of practical application studies. Here, we perf…	Article	https://doi.org/10.1016/j.ecolind.2017.03.060	94			82	99		https://doi.org/10.1016/j.ecolind.2017.03.060
	Viglia S., Civitillo D.F., Cacciapuoti G., Ulgiati S.	2018	Indicators of environmental loading and sustainability of urban systems. An emergy-based environmental footprint	Ecological Indicators	Cities are the engine of economic development and human wellbeing, but their dynamics needs to be supported by the convergence of large flows of material and energy resources. Assessing a city resource metabolism becomes increasingly crucial, not only concerning the relation with the environment as a source or a sink, but also concerning the internal dynamics of resource exchange among city compo…	Article	https://doi.org/10.1016/j.scitotenv.2017.09.326	615			581	587		https://doi.org/10.1016/j.scitotenv.2017.09.326
	Yan Y.	2018	Integrate carbon dynamic models in analyzing carbon sequestration impact of forest biomass harvest	Science of the Total Environment	Biomass is an attractive natural energy resource for mitigating climate change. However, the loss of carbon sequestration as an ecosystem service due to biomass harvest has not been considered in previous studies. To assess the impact of biomass harvest on carbon sequestration, carbon dynamics in the forests and the atmosphere were integrated. The impact of forest biomass harvests on carbon seque…	Article	https://doi.org/10.3390/land11122106	11	12	2106				https://doi.org/10.3390/land11122106
	Oginah S.A., Posthuma L., Maltby L., Hauschild M., Fantke P.	2023	Linking freshwater ecotoxicity to damage on ecosystem services in life cycle assessment	Environment International	Freshwater ecosystems provide major benefits to human wellbeing—so-called ecosystem services (ES)—but are currently threatened among others by ecotoxicological pressure from chemicals reaching the environment. There is an increased motivation to incorporate ES in quantification tools that support decision-making, such as life cycle assessment (LCA). However, mechanistic models and frameworks that…	Review	https://doi.org/10.1016/j.envint.2022.107705	171		107705				https://doi.org/10.1016/j.envint.2022.107705
	Błońska E., Kempf M., Lasota J.	2022	Woody debris as a substrate for the growth of a new generation of forest trees	Forest Ecology and Management	In Europe, peat is the dominant growing medium in nursery production. Undisturbed peatlands perform very important ecosystem services, while exploited ones are degraded and emit CO2 into the atmosphere. Therefore, peat excavation has a large environmental footprint and is strongly discouraged by EU directives. Currently, efforts are being made to limit the commercial exploitation of peat in order…	Review	https://doi.org/10.1016/j.foreco.2022.120566	525		120566				https://doi.org/10.1016/j.foreco.2022.120566
	Buddenhagen C.E., Bourdȏt G., Cripps M., Bell N., Champion P., Dodd M., Eerens H., Ghanizadeh H., Griffiths A., Harrington K., Heenan P., Hulme P.E., James T., Kean J., Lamoureaux S., Neal J., Ngow Z., Obadovic I., Orre-Gordon S., Percy H., Rolston P., Tozer K., Wynne-Jones B., Zydenbos S.	2022	A horizon scan for temperate pastoral weed science–a New Zealand perspective	New Zealand Journal of Agricultural Research	Pastures represent about half of the global agricultural area and productivity losses from weeds are significant. The complex interactions between them and other pasture plants, livestock and the environment imply a need for innovative research that transforms pasture management. To this end, a horizon scan was conducted to identify relevant issues, questions, opportunities, and drivers. The driv…	Review	https://doi.org/10.1080/00288233.2022.2107026							https://doi.org/10.1080/00288233.2022.2107026
	De Luca Peña L.V., Taelman S.E., Préat N., Boone L., Van der Biest K., Custódio M., Hernandez Lucas S., Everaert G., Dewulf J.	2022	Towards a comprehensive sustainability methodology to assess anthropogenic impacts on ecosystems: Review of the integration of Life Cycle Assessment, Environmental Risk Assessment and Ecosystem Services Assessment	Science of the Total Environment	Nowadays, a variety of methodologies are available to assess local, regional and global impacts of human activities on ecosystems, which include Life Cycle Assessment (LCA), Environmental Risk Assessment (ERA) and Ecosystem Services Assessment (ESA). However, none can individually assess both the positive and negative impacts of human activities at different geographical scales in a comprehensive…	Review	https://doi.org/10.1016/j.scitotenv.2021.152125	808		152125				https://doi.org/10.1016/j.scitotenv.2021.152125
	Hardaker A., Styles D., Williams P., Chadwick D., Dandy N.	2022	A framework for integrating ecosystem services as endpoint impacts in life cycle assessment	Journal of Cleaner Production	Life cycle assessment is an analysis technique used to assess the environmental burdens of products or production processes. Ecosystem services is a concept used to understand the ways functioning ecosystems support human wellbeing. Both are used to understand how anthropogenic pressures impact the environment. The integration of ecosystem services as indicators in life cycle assessment is increa…	Review	https://doi.org/10.1016/j.jclepro.2022.133450	370		133450				https://doi.org/10.1016/j.jclepro.2022.133450
	Larrey-Lassalle P., Decker S.A., Perfido D., Naneci S., Rugani B.	2022	Life Cycle Assessment Applied to Nature-Based Solutions: Learnings, Methodological Challenges, and Perspectives from a Critical Analysis of the Literature	Land	The use of life cycle assessment (LCA) allows work to go beyond the traditional scope of urban nature-based solutions (NBS), in which ecosystem services are provided to citizens, to include environmental impacts generated over the entire life cycle of the NBS, i.e., from raw material extraction, through materials processing, production, distribution, and use stages, to end-of-life management. In …	Review	https://doi.org/10.3390/land11050649	11	5	649				https://doi.org/10.3390/land11050649
	Merida V.E., Cook D., Ögmundarson Ó., Davíðsdóttir B.	2022	Ecosystem services and disservices of meat and dairy production: A systematic literature review	Ecosystem Services	Intensification of the food system and higher consumption of meat and dairy products has placed heavy pressure on the ecological infrastructure responsible for providing ecosystem services (ES). Agroecosystem management often focuses on yield optimization and loses sight of nature's contribution. This paper uses a systematic literature review and the Common International Classification of Ecosyst…	Review	https://doi.org/10.1016/j.ecoser.2022.101494	58		101494				https://doi.org/10.1016/j.ecoser.2022.101494
	Shahmohammad M., Hosseinzadeh M., Dvorak B., Bordbar F., Shahmohammadmirab H., Aghamohammadi N.	2022	Sustainable green roofs: a comprehensive review of influential factors	Environmental Science and Pollution Research	Green roofs have gained much attention as a modern roofing surface due to their potential to deliver many environmental and social benefits. Studies have indicated that different GR designs deliver different ecosystem services, and there are important factors that affect GR performance. This article reviewed significant factors that influence GR performance and sustainability. Substrate and drain…	Review	https://doi.org/10.1016/j.buildenv.2022.109122	219		109122				https://doi.org/10.1016/j.buildenv.2022.109122
	Thornton P., Dijkman J., Herrero M., Szilagyi L., Cramer L.	2022	Viewpoint: Aligning vision and reality in publicly funded agricultural research for development: A case study of CGIAR	Food Policy	Global food systems are currently facing unprecedented challenges with respect to production and nutritional targets, inclusivity and environmental footprint. Several recent reports highlight the need for major, rapid reconfiguration of our food systems as a result. International publicly funded agricultural research for development will play an increasingly vital role in support of such goals as…	Review	https://doi.org/10.3390/agriculture12060851	12	6	851				https://doi.org/10.3390/agriculture12060851
	Amulya K., Katakojwala R., Ramakrishna S., Venkata Mohan S.	2021	Low carbon biodegradable polymer matrices for sustainable future	Composites Part C: Open Access	One of the crowning glories of 20th century was the development of petroleum-based plastics. Eighty years later, with pioneering advances and series of breakthroughs in research and industrial innovations, plastics have become an integral part of our everyday lives. While the applications of plastics are multifarious, their unrestricted disposal is causing damage to the ecosystem services and bio…	Review	https://doi.org/10.1007/s11367-020-01863-0	26	4		643	655		https://doi.org/10.1007/s11367-020-01863-0
	Green A.G., Abdulai A.-R., Duncan E., Glaros A., Campbell M., Newell R., Quarshie P., Krishna Bahadur K.C., Newman L., Nost E., Fraser E.D.G.	2021	A scoping review of the digital agricultural revolution and ecosystem services: implications for Canadian policy and research agendas	Facets	The application of technologies such as artificial intelligence, robotics, blockchain, cellular agriculture, and big data analytics to food systems has been described as a digital agricultural revolution with the potential to increase food security and reduce agriculture’s environmental footprint. Yet, the scientific evidence informing how these technologies may impact or enhance ecosystem servic…	Review	https://doi.org/10.1111/jiec.13111	25	4		1089	1101		https://doi.org/10.1111/jiec.13111
	Kumar R., Verma A., Shome A., Sinha R., Sinha S., Jha P.K., Kumar R., Kumar P., Shubham, Das S., Sharma P., Prasad P.V.V.	2021	Impacts of plastic pollution on ecosystem services, sustainable development goals, and need to focus on circular economy and policy interventions	Sustainability (Switzerland)	Plastic pollution is ubiquitous in terrestrial and aquatic ecosystems. Plastic waste exposed to the environment creates problems and is of significant concern for all life forms. Plastic production and accumulation in the natural environment are occurring at an unprecedented rate due to indiscriminate use, inadequate recycling, and deposits in landfills. In 2019, the global production of plastic …	Review	https://doi.org/10.1002/agj2.20844	113	6		4639	4647		https://doi.org/10.1002/agj2.20844
	Notenbaert A.M.O., Douxchamps S., Villegas D.M., Arango J., Paul B.K., Burkart S., Rao I., Kettle C.J., Rudel T., Vázquez E., Teutscherova N., Chirinda N., Groot J.C.J., Wironen M., Pulleman M., Louhaichi M., Hassan S., Oberson A., Nyawira S.S., Pinares-Patino C.S., Peters M.	2021	Tapping Into the Environmental Co-benefits of Improved Tropical Forages for an Agroecological Transformation of Livestock Production Systems	Frontiers in Sustainable Food Systems	Livestock are critical for incomes, livelihoods, nutrition and ecosystems management throughout the global South. Livestock production and the consumption of livestock-based foods such as meat, cheese, and milk is, however, under global scrutiny for its contribution to global warming, deforestation, biodiversity loss, water use, pollution, and land/soil degradation. This paper argues that, althou…	Review	https://doi.org/10.1177/0030727020975778	50	2		141	147		https://doi.org/10.1177/0030727020975778
	Soulé E., Michonneau P., Michel N., Bockstaller C.	2021	Environmental sustainability assessment in agricultural systems: A conceptual and methodological review	Journal of Cleaner Production	As the sustainable development movement gains traction, many initiatives have aimed to provide support with sustainability assessment methods using a loosely structured set of indicators, resulting in an explosive development of such indicators. Several reviews have sought to gain a clearer understanding of this “indicator zoo” by comparing assessment methods. However, most reviews covered few me…	Review	https://doi.org/10.1016/j.agee.2021.107614	321		107614				https://doi.org/10.1016/j.agee.2021.107614
	VanderWilde C.P., Newell J.P.	2021	Ecosystem services and life cycle assessment: A bibliometric review	Resources, Conservation and Recycling	This paper uses bibliometric mapping and network analysis to review decades of research on ecosystem services and life cycle assessment (LCA). The study reveals how these two academic fields evolved to become distinct fields with little interaction despite shared environmental sustainability objectives. In assessing more than 56,000 publications, we identified just 91 LCA studies that integrate b…	Review	https://doi.org/10.1016/j.ecolind.2021.107918	129		107918				https://doi.org/10.1016/j.ecolind.2021.107918
	Crenna E., Marques A., La Notte A., Sala S.	2020	Biodiversity Assessment of Value Chains: State of the Art and Emerging Challenges	Environmental Science and Technology	The consumption of materials and products is one of the drivers of biodiversity loss, which in turn affects ecosystem functioning and has socio-economic consequences worldwide. Life cycle assessment (LCA) is a reference methodology for appraising the environmental impacts of products along their value chains. Currently, a generally accepted life cycle impact assessment (LCIA) framework for assess…	Review	https://doi.org/10.1016/j.scitotenv.2019.135859	706		135859				https://doi.org/10.1016/j.scitotenv.2019.135859
	D'Amato D., Gaio M., Semenzin E.	2020	A review of LCA assessments of forest-based bioeconomy products and processes under an ecosystem services perspective	Science of the Total Environment	The emergence of politically driven bioeconomy strategies worldwide calls for considering the ecological issues associated with bio-based products. Traditionally, life cycle analysis (LCA) approaches are key tools used to assess impacts through product life cycles, but they present limitations regarding the accounting of multiple ecosystem service-related issues, at both the land-use and supply c…	Review	https://doi.org/10.3390/su12239832	12	23	9832	1	5		https://doi.org/10.3390/su12239832
	El Chami D., Daccache A., El Moujabber M.	2020	How can sustainable agriculture increase climate resilience? A systematic review	Sustainability (Switzerland)	In the last few decades, a great deal has been written on the use of sustainable agriculture to improve the resilience of ecosystem services to climate change. However, no tangible and systematic evidence exists on how this agriculture would participate in alleviating impacts on vulnerable rural communities. This paper provides a narrative systematic review (SR) integrated with a bibliometric ana…	Review	https://doi.org/10.1016/j.jclepro.2020.123510	276		123510				https://doi.org/10.1016/j.jclepro.2020.123510
	Nguyen T.T., Ngo H.H., Guo W., Wang X.C.	2020	A new model framework for sponge city implementation: Emerging challenges and future developments	Journal of Environmental Management	Sponge City concept is emerging as a new kind of integrated urban water systems, which aims to address urban water problems. However, its implementation has encountered a variety of challenges. The lack of an integrated comprehensive model to assist Sponge City planning, implementation and life cycle assessment is one of the most challenging factors. This review briefly analyses the opportunity o…	Review	https://doi.org/10.20417/nzjecol.44.15	44	2	3408				https://doi.org/10.20417/nzjecol.44.15
	Wang Q., Xiao H., Ma Q., Yuan X., Zuo J., Zhang J., Wang S., Wang M.	2020	Review of emergy analysis and life cycle assessment: Coupling development perspective	Sustainability (Switzerland)	Two methods of natural ecosystem assessment-emergy analysis (EMA) and life cycle assessment (LCA)-are reviewed in this paper. Their advantages, disadvantages, and application areas are summarized, and the similarities and differences between these two evaluation methods are analyzed respectively. Their research progress is also sorted out. The study finds that EMA and LCA share common attributes …	Review	https://doi.org/10.1016/j.jclepro.2019.119244	248		119244				https://doi.org/10.1016/j.jclepro.2019.119244
	Aubin J., Callier M., Rey-Valette H., Mathé S., Wilfart A., Legendre M., Slembrouck J., Caruso D., Chia E., Masson G., Blancheton J.P., Ediwarman, Haryadi J., Prihadi T.H., de Matos Casaca J., Tamassia S.T.J., Tocqueville A., Fontaine P.	2019	Implementing ecological intensification in fish farming: definition and principles from contrasting experiences	Reviews in Aquaculture	Ecological intensification is a new concept in agriculture that addresses the double challenge of maintaining a level of production sufficient to support needs of human populations and respecting the environment in order to conserve the natural world and human quality of life. This article adapts this concept to fish farming using agroecological principles and the ecosystem services framework. Th…	Review	https://doi.org/10.1016/j.geoderma.2018.11.042	338			555	567		https://doi.org/10.1016/j.geoderma.2018.11.042
	Middelberg J., Azhar B., Khoon K.L., Van Der Meer P.J.	2019	An ecosystem services analysis of oil palm and alternative land use systems on peat in Malaysia	Journal of Oil Palm Research	In this article, we assess the potential of alternative land use systems using non-drainage peatland species which could eventually phase out or partly replace oil palm plantations on undrainable peatlands. We have used the ecosystem services approach to analyse what scenarios using drainage-free peatland species could be suitable alternatives for oil palm cultivation on peat and how these scenar…	Review	https://doi.org/10.1016/j.scitotenv.2018.12.131	657			1150	1160		https://doi.org/10.1016/j.scitotenv.2018.12.131
	Pulighe G., Bonati G., Colangeli M., Morese M.M., Traverso L., Lupia F., Khawaja C., Janssen R., Fava F.	2019	Ongoing and emerging issues for sustainable bioenergy production on marginal lands in the Mediterranean regions	Renewable and Sustainable Energy Reviews	The cultivation of marginal lands for bioenergy production has recently become a topic of research interest for the agronomic and agricultural economy scientific communities. The growing availability of arable land in the Mediterranean regions, as a consequence of the decline of cereal cropping systems and grain legume, provides ample opportunities for performing successful feedstock production o…	Review	https://doi.org/10.1007/s11367-019-01590-1	24	9		1620	1630		https://doi.org/10.1007/s11367-019-01590-1
	Vanham D., Leip A., Galli A., Kastner T., Bruckner M., Uwizeye A., van Dijk K., Ercin E., Dalin C., Brandão M., Bastianoni S., Fang K., Leach A., Chapagain A., Van der Velde M., Sala S., Pant R., Mancini L., Monforti-Ferrario F., Carmona-Garcia G., Marques A., Weiss F., Hoekstra A.Y.	2019	Environmental footprint family to address local to planetary sustainability and deliver on the SDGs	Science of the Total Environment	The number of publications on environmental footprint indicators has been growing rapidly, but with limited efforts to integrate different footprints into a coherent framework. Such integration is important for comprehensive understanding of environmental issues, policy formulation and assessment of trade-offs between different environmental concerns. Here, we systematize published footprint stud…	Review	https://doi.org/10.3097/LO.201864	64			1	48		https://doi.org/10.3097/LO.201864
	Dabros A., Pyper M., Castilla G.	2018	Seismic lines in the boreal and arctic ecosystems of North America: Environmental impacts, challenges, and opportunities	Environmental Reviews	The oil and gas industry has grown significantly throughout the boreal and arctic ecosystems of North America. A major feature of the ecological footprint of oil and gas exploration is seismic lines-narrow corridors used to transport and deploy geophysical survey equipment. These lines, which traverse forests, tundra, uplands, and peatlands, were historically up to 10 m wide. Over the past decade…	Review	https://doi.org/10.1016/j.jclepro.2018.07.157	199			503	517		https://doi.org/10.1016/j.jclepro.2018.07.157
	Kazemi H., Klug H., Kamkar B.	2018	New services and roles of biodiversity in modern agroecosystems: A review	Ecological Indicators	Ecosystem services and biodiversity are critical to ensure sustainable development of agricultural activities. Based on available scientific knowledge, high shares of biodiversity are followed by more carbon sequestration, reduced soil erosion risk, improved production and food security. This review aims to detect biodiversity services in three aspects; (1) providing ecosystem services in modern …	Review	https://doi.org/10.1016/j.agwat.2018.01.007	200			34	46		https://doi.org/10.1016/j.agwat.2018.01.007
	Maia de Souza D., Lopes G.R., Hansson J., Hansen K.	2018	Ecosystem services in life cycle assessment: A synthesis of knowledge and recommendations for biofuels	Ecosystem Services	There is an increasing trend in promoting the use of biofuels for transportation as a low-fossil carbon energy source, but little knowledge on their multidimensional environmental impacts. Whole-system approaches, such as life cycle assessment (LCA), have been extensively employed to analyze the environmental performance of different biofuels. However, it remains unclear to which extent biofuels …	Review	https://doi.org/10.1016/j.biombioe.2017.05.003	114			8	17		https://doi.org/10.1016/j.biombioe.2017.05.003
	Tang L., Hayashi K., Kohyama K., Leon A.	2018	Reconciling life cycle environmental impacts with ecosystem services: A management perspective on agricultural land use	Sustainability (Switzerland)	Impacts on ecosystem services that are related to agricultural land use greatly differ depending on management practices employed. This study aimed to reveal issues associated with evaluating ecosystem services related to land use at the management level during life cycle assessment (LCA) and to consider future challenges. Firstly, a relationship between agricultural ecosystem services and manage…	Review	https://doi.org/10.3390/su10114089	10	11	4089				https://doi.org/10.3390/su10114089

## Sheet: Table S1.2
Table S1.2 Systematic review analysis	List of acronyms:
	NCP	= Natural Capital Protocol			FU =	Functional Unit				VALUATION SCALE
	SEEA	= System of Environmental-Economic Accounting			NC =	Natural Capital				1 = methodological development at infancy and low number of applications
	LCA	= Life Cycle Assessment-based methods			NCA =	Natural Capital Accounting				2 = NCA framework scientifically validated, and ideally ready for applications in real business or policy making
	EMA	= EMergy Analysis			ES =	Ecosystem Service(s)				3 = NCA framework already used for decision-making support
	EFA	= Ecological Footprint Accounting			GIS =	Geographic Information System				Coloured cells in coloumn V: considered the most advanced
	EQA	= Expert-based Qualitative Accounting			CICES =	Common International Classification of Ecosystem Services
	BVES	= Biophysical Valuation of Ecosystem Services			GDP =	Gross Domestic Product				List of #21 selected functional reviews
	MVES	= Monetary Valuation of Ecosystem Services								List of #22 selected NCA methodological reports from the grey literature
	WEA	= Wealth Accounting
ARTICLES (reviewed documents: #77)				How is the NCA framework conceived? *		What is the NCA framework made of?		How is the NCA framework applied?					Does the NCA framework account for/assess what?				What is the nature of the NCA framework's indicators?				Value judgement: relative state of advancement of the NCA framework
Full citation	Aim(s) of the study	Main reference NCA system	Characteristics of the NCA system and NC dependency framework	NCA in support to "strong" sustainability	NCA in support of "weak" sustainability	Single methodology	More than one methodology	Application to one business/economic sector or technology	Application to more than one business/economic sectors or technologies	Application to territorial scale (urban, regional, national, international)	ISIC Rev. 4**	Additional information (primary, secondary, or tertiary sector; FU etc.)	Ecosystem services	Abiotic resources	Biodiversity	Other ecological assets or unspecified environmental capital or asset	Qualitative: survey-based valuation or other approaches (e.g., statistical)	Quantitative: biophysical valuation	Quantitative: economic valuation	What are the main limitation(s)/bias(es) of the NCA framework?	Scale: from 1 (far from being operational NCA) to 3 (close to be, or already operational NCA)
Albert, C., C. Schröter-Schlaack, B. Hansjürgens, A. Dehnhardt, R. Döring, H. Job, J. Köppel, S. Krätzig, B. Matzdorf, M. Reutter, S. Schaltegger, M. Scholz, M. Siegmund-Schultze, H. Wiggering, M. Woltering and C. von Haaren (2017). "An economic perspective on land use decisions in agricultural landscapes: Insights from the TEEB Germany Study." Ecosystem Services 25: 69-78.	Explore, within the framework of a TEEB Germany study, the causes of the continued decline of ES and biodiversity in Germany, introducing case studies exemplifying an economic perspective on ES and biodiversity in land use decisions, and synthesizing key recommendations for policy, planning and management	MVES	Demonstration of the potential usefulness of an economic perspective in addition to the usually available information about environmental qualities and impacts, through the analysis of: the economic benefits and costs of the conversion of high nature value grassland; the benefits and costs of riverbank buffer zones; and water-sensitive farming for drinking water production		√	√				√	National economy	Territorial scale; three case studies on grassland protection, the establishment of riverbank buffer zones and water-sensitive farming illustrate that an economic perspective can convey recognition of the values of ES and biodiversity	√						√	The examples given suggest that the actual progress in safeguarding, enhancing and restoring natural capital requires further efforts	2
Ascui, F., A. Ball, L. Kahn and J. Rowe (2021). "Is operationalising natural capital risk assessment practicable?" Ecosystem Services 52: 101364.	Assess the practicability of natural capital dependency risk indicators and data sources for a critical case study of Australian sheep production	EQA	Information on dependencies and threats triangulated from multiple sources, including a review of academic papers and publications from Australian industry-specific bodies such as Meat and Livestock Australia (MLA), Sheep CRC, Australian Wool Innovation (AWI) and relevant government agencies; expert elicitation method applied to assign a score (on a 5-point Likert scale from 0 to 4, in 0.5 increm…		√	√		√			A-144	Primary sector; analysis undertaken for both impact and dependency risks on broadacre sheep production, excluding feedlots, which account for about 14% of Australian lamb production	√	√	√		√			Suitable risk thresholds only characterised for a few of the indicators analysed; further research required to investigate the links between the identified indicators, or similar alternatives, and long-term financial performance	2
Aspinall, R. and M. Staiano (2018). "Ecosystem services as the products of land system dynamics: lessons from a longitudinal study of coupled human–environment systems." Landscape Ecology 34(7): 1503-1524.	Characterise and understand the dynamics of change in provisioning services from agriculture in Scotland over the period 1940–2016, identifying ways in which funds of capitals and flows of inputs and output ecosystem goods are linked to land management practices and policies at a national scale	BVES	Accounting framework that links funds of natural, human, physical and financial capital, with flows of goods and services; flow–fund ratios are used as benchmarks of system performance and dynamics		√	√		√			A-1	Primary sector; detailed annual record, from 1940 to 2016, of ecosystem services and land systems in Scotland, focussing on provisioning services from agriculture: annual financial inputs (costs) and outputs (benefits) and the total production and uses of crop and livestock goods from farming in the country	√					√	√	Only provisioning services with data from national statistics in the primary sector (livestock and crops) are accounted for	2
Atkinson, G. and P. Ovando (2021). "Distributional Issues in Natural Capital Accounting: An Application to Land Ownership and Ecosystem Services in Scotland." Environmental and Resource Economics 81(2): 215-241.	Examine the significance of the ownership of land on which ecosystem assets (or ecosystem types) is located in the context of natural capital accounting, illustrating this in an empirical application to two ecosystem services and a range of ecosystem types and land ownership in Scotland, a context in which land reform debates are longstanding	SEEA	Framework to account for the use and supply distribution of two ecosystem services (climate change regulation through carbon sequestration and air pollution removal) across private and publicly owned land on which natural capital is located, in order to indicate the relative importance of private land in the supply of these ecosystem services	√		√		√			N-813	Tertiary sector; focus on the supply of ecosystem services, in terms of ownership of the land where the ecosystem assets—giving rise to these services—are located	√					√	√	Limited number of ecosystem services considered; NCA framework not apparently operational yet	2
Bagstad, K. J., Z. H. Ancona, J. Hass, P. D. Glynn, S. Wentland, M. Vardon and J. Fay (2020). "Integrating physical and economic data into experimental water accounts for the United States: Lessons and opportunities." Ecosystem Services 45: 101182.	Present the first national and subnational SEEA-Water accounts for the United States, compiling accounts for water: (1) physical supply and use, (2) productivity, (3) quality, and (4) emissions for roughly the years 2000 to 2015	SEEA	Water productivity estimated by dividing GDP for a particular industry or the entire economy by its water use, providing a measure of how efficiently water is used as an input to economic activity; state, regional, and national level water productivity estimated for the years 2000, 2005, 2010, and 2015, by dividing GDP (in constant 2009 dollars, BEA 2017) by water use in each year		√	√			√		A-1, A-3, B, C, D-35, E-36, R-93	Several sectors among primary, secondary and tertiary ones, making use of water: physical flows of water to aquaculture, domestic, industrial, irrigation, livestock, mining, public supply, and thermoelectric power sectors; 3-digit North American Industry Classification System (NAICS) codes		√				√	√	Only water provision and water emission data are accounted for	2
Banerjee, O., M. Cicowiez, R. Vargas, C. Obst, J. R. Cala, A. C. Alvarez-Espinosa, S. Melo, L. Riveros, G. Romero and D. S. Meneses (2021). "Gross domestic product alone provides misleading policy guidance for post-conflict land use trajectories in Colombia." Ecological Economics 182: 106929.	Present a future looking Integrated Economic-Environmental Modeling (IEEM) framework for evaluating the impacts of public policy and investment, with an application to evaluating post-conflict land use trajectories in Colombia and demonstrating the dangers of using gross domestic product (GDP) alone and the advantages of Genuine Savings to guide sustainable development policy in Colombia and beyo…	SEEA	IEEM calibrated to a 2014 Social Accounting Matrix (SAM) and other data for Colombia, suitable for SEEA and based on dynamic computable general equilibrium model; focus on forest natural capital stocks and environmental quality proxied for by changes is greenhouse gas emissions		√		√			√	National economy	Territorial scale; the SAM includes 105 activities and 29 commodities; 98 factors (labor, capital, 92 land categories, 4 other natural resources); one representative households; and other institutions (non-profit institutions serving households, enterprises, government, and rest of the world)				√	√		√	The IEEM established for this study is not fully operational for conduting NCA in a routinized way	2
Berchoux, T. and C. W. Hutton (2019). "Spatial associations between household and community livelihood capitals in rural territories: An example from the Mahanadi Delta, India." Applied Geography 103: 98-111.	Integrate findings from a participatory analysis conducted in the Mahanadi Delta in India into a quantitative analysis to highlight the spatial distribution of livelihood capitals and to characterise the existing associations between them	EQA	Participatory Rural Appraisal used as the principal suite of tools for data collection to highlight the perceptions and opinions of rural dwellers; participants identify the factors that influence their choice of a livelihood activity (livelihood capitals: natural, physical, human, financial and social capitals)		√		√			√	Urban/Local economy	Territorial scale; semi-structured interviews conducted with governmental and non-governmental organisations at the State level; villages sampled based on their socio-economic characteristics and on the main livelihood activities conducted by households; GIS and land cover data used to estimate proxies for environmental conditions				√	√			The relationships between community development and livelihood dynamics are not sufficiently accounted for; accounting framework very specific for on-field surveys at a very local scale of rural villages	1
Berrios, F., D. E. Campbell and M. Ortiz (2017). "Emergy evaluation of benthic ecosystems influenced by upwelling in northern Chile: Contributions of the ecosystems to the regional economy." Ecological Modelling 359: 146-164.	Carry out emergy evaluations of three benthic ecosystem networks found in Mejillones, Antofagasta and Tongoy Bays (northern Chile) in order to estimate the biophysical and economic contributions of those coastal ecosystems to the local economy	EMA	Application of EMA using ecological network modelling to depict NC features (trophic network analysis combined with emergy evaluation: sector dependent on food web)	√		√		√			A-311	Primary sector; coastal area supplying fishery resources	√	√	√	√		√	√	Not explicit reference to NCA; uncertainties in emergy flows data analysis and economic estimations	2
Borger, T., T. L. Hooper, M. C. Austen, O. Marcone and O. Rendon (2020). "Using stated preference valuation in the offshore environment to support marine planning." Journal of Environmental Management 265: 110520.	Use a discrete choice experiment survey around the benefits of improving the conditions of the seabed in England to demonstrate some of the challenges of valuing marine natural capital in a marine planning context, focusing on the East Marine Plan (EMP) area (southern part of the English North Sea)	MVES	A stated preference approach (discrete choice experiment to value changes to components of marine natural capital in the EMP area) is used in order to capture the potentially high proportion of non-use value of the goods and services under study		√	√				√	Regional economy	Territorial scale; choice attributes presented to respondents as the outcomes of different management options to restore the seabed, potentially including activity, place and time restrictions			√	√	√		√	The challenges addressed are specific to the marine environment and often complicate the use of stated preference valuation for marine planning	1
Bruley, E., B. Locatelli, M. J. Colloff, N. Salliou, T. Métris and S. Lavorel (2021). "Actions and leverage points for ecosystem-based adaptation pathways in the Alps." Environmental Science & Policy 124: 567-579.	Analyse the levers required to implement ecosystem-based adaptation (EBA) to reach a future desired by stakeholders of a mountain social-ecological system in the French Alps	EQA	Participatory backcasting approach (based on serious gaming, matrix and lever analyses, and future scenarios framing; individuals and organisations dependent on local NC)		√		√		√		(mainly) P, R	Tertiary sector; adaptation objectives derived from visioning and gaming involving stakeholders from various socio-economic sectors	√			√	√			Not explicit reference to NCA; low degree of replicability of the approach	1
Buonocore, E., L. Vanoli, A. Carotenuto and S. Ulgiati (2015). "Integrating life cycle assessment and emergy synthesis for the evaluation of a dry steam geothermal power plant in Italy." Energy 86: 476-487.	Analyse the environmental performance of a geothermal power plant located in the Tuscany region of Italy from a cradle to grave perspective, applying both LCA and Emergy Synthesis methodologies in combination	LCA	Combined LCA-EMA approach (production system dependent on NC)	√			√	√			D-351	Secondary sector; geothermal power plant, energy production (FU = 1 kWh electricity produced)	√	√				√		Not explicit reference to NCA; limited number of ES assessed	2
Burke, T., J. D. Whyatt, C. Rowland, G. A. Blackburn and J. Abbatt (2020). "The influence of land cover data on farm-scale valuations of natural capital." Ecosystem Services 42: 101065.	Use of land cover and benefit transfer approaches to produce monetary valuations of ecosystem service provision within individual farms, ranging from small to large landholdings and covering livestock and arable farming in the UK	MVES	Monetary valuation based on land cover and benefit transfer approach (production system dependent on NC)		√		√		√		A-1, A-2	Primary sector; valuation of environmental income, assets, and contribution of ecosystem service to consumptions at regional and sectoral scale	√					√	√	Not explicit reference to NCA; uncertainties in the use of monetary valuation techniques	2
Cabral, P., F. S. Campos, J. David and U. Caser (2021). "Disentangling ecosystem services perception by stakeholders: An integrative assessment based on land cover." Ecological Indicators 126: 107660.	Describe a participatory methodology for extracting stakeholders’ ES perception for continental Portugal based on land cover using analytical hierarchy process (AHP) - a Multi-Criteria Decision Analysis (MCDA) method -, a matrix-based approach with data visualization techniques, and a scenario analysis	EQA	Use of ES indicators based on CORINE Land Cover (CLC) for disentangling stakeholders’ perceptions on ES in order to defining sustainable development policies, balancing economic and ecological goals		√	√				√	National economy	Territorial scale; participatory workshop to obtain new information for qualitative mapping of ES provision in Portugal based on land cover according to stakeholders’ perception	√				√			Mapping of ES based on perception data and stakeholders' interaction, which is of qualitative type and based on subjective interpretation	2
Campos, Álvarez, Oviedo, Ovando, Mesa and Caparrós (2020). "Income and Ecosystem Service Comparisons of Refined National and Agroforestry Accounting Frameworks: Application to Holm Oak Open Woodlands in Andalusia, Spain." Forests 11(2): 185.	Measure and compare the environmental assets, ecosystem services, and incomes at basic and social prices by applying a refined version of the standard System of National Accounts (rSNA) and the authors’ Agroforestry Accounting System (AAS), respectively, to the holm oak open woodlands of the region of Andalusian (Spain)	SEEA	Non-market valuation techniques compatible for the SEEA (economic system dependent on NC)		√		√		√		A-1, A-2	Primary sector; valuation of environmental income, assets, and contribution of ecosystem service to consumptions at regional and sectoral scale	√		√	√			√	Artificious adaptation of economic activities for valuing ES and instrumental creation of an ecosystem institutional sector; quite sophisticated economic accounting needed	3
Campos, P., A. Álvarez, B. Mesa, J. L. Oviedo and A. Caparrós (2021). "Linking standard Economic Account for Forestry and ecosystem accounting: Total forest incomes and environmental assets in publicly-owned conifer farms in Andalusia-Spain." Forest Policy and Economics 128: 102482.	Compare the final products and incomes estimated by applying the Economic Account for Forestry (EAF) and Agroforestry Accounting System (AAS) frameworks, and measure the sensitivity of conifer farm environmental assets to changes in land ownership rights and discounting rates in accordance with the AAS results	SEEA	Non-market valuation techniques compatible for the SEEA (economic system dependent on NC)		√		√		√		A-1, A-2	Primary sector; valuation of environmental income, assets, and contribution of ecosystem service to consumptions at regional and sectoral scale	√		√	√			√	Several weaknesses highlighted at the level of AAS application (e.g., risk of double counting of value added; possible underestimation of the private amenity service; etc.)	3
Campos, P., A. Álvarez, B. Mesa, J. L. Oviedo, P. Ovando and A. Caparrós (2020). "Total income and ecosystem service sustainability index: Accounting applications to holm oak dehesa case study in Andalusia-Spain." Land Use Policy 97: 104692.	Develop the novel concept of an economic ecosystem service sustainability index from the perspective of total income theory, and present its empirical application at the spatial unit scale of the agroforestry farm	SEEA	Non-market valuation techniques compatible for the SEEA (economic system dependent on NC)		√		√		√		A-1, A-2	Primary sector; valuation of environmental income, assets, and contribution of ecosystem service to consumptions at regional and sectoral scale	√		√	√			√	Model somehow limited in providing sustainability thresholds based on two constraining variables: environmental income (based on availability or scarcity of environmental assets) and ecosystem service contribution to sustainable product consumption	3
Campos, P., A. Álvarez, J. L. Oviedo, P. Ovando, B. Mesa and A. Caparrós (2020). "Refined Systems of National Accounts and Experimental Ecosystem Accounting Versus the Simplified Agroforestry Accounting System: Testing in Andalusian Holm Oak Open Woodlands." Forests 11(4): 393.	Present detailed applications and comparisons of former (authors') developments of the refined SEEA–EEA and refined System of National Accounts (SNA) with a simplified version of the Agroforestry Accounting System (AAS)	SEEA	Non-market valuation techniques compatible for the SEEA (economic system dependent on NC)		√		√		√		A-1, A-2	Primary sector; valuation of environmental income, assets, and contribution of ecosystem service to consumptions at regional and sectoral scale	√		√	√			√	The use of social pricing based on farmers and government estimates (or even consumer-revealed or -stated preferences for final product consumption) might hamper replicability of the ecosystem accounting valuations over different temporal and scale dimensions	3
Campos, P., J. L. Oviedo, A. Álvarez, P. Ovando, B. Mesa and A. Caparrós (2020). "Measuring environmental incomes beyond standard national and ecosystem accounting frameworks: testing and comparing the agroforestry Accounting System in a holm oak dehesa case study in Andalusia-Spain." Land Use Policy 99: 104984.	Discuss conceptually and compare the measurements of ecosystem services and environmental incomes in the extended Agroforestry Accounting System (AAS), and in refined versions of the official System of National Accounts (SNA) and the ongoing Experimental Ecosystem Accounting (EEA) methodologies, through a case study of privately-owned holm oak dehesas working landscapes in Andalusia-Spain	SEEA	Non-market valuation techniques compatible for the SEEA (economic system dependent on NC)		√		√		√		A-1, A-2	Primary sector; valuation of environmental income, assets, and contribution of ecosystem service to consumptions at regional and sectoral scale	√		√	√			√	The EEA needs to be further improved to reveal the economic contribution of nature to the total income from the natural environment enjoyed by society	3
Capriolo, A., R. G. Boschetto, R. A. Mascolo, S. Balbi and F. Villa (2020). "Biophysical and economic assessment of four ecosystem services for natural capital accounting in Italy." Ecosystem Services 46: 101207.	Present methods and results of country-based natural capital assessments for four ecosystem services (ES) in Italy, carrying out a spatial mapping and assessment in both physical and monetary terms for using the ARIES (Artificial Intelligence for Ecosystem Services) technology, and developing extent, supply and use accounting tables for the same ecosystem services in line with the United Nations …	BVES	Customization of the ARIES models and data sources for four different ecosystem services in Italy, by using the most appropriate model parameterizations and data officially available at the national level; the modelling outputs are provided in a format that fits the extent, supply and use tables of the SEEA-EEA framework		√		√			√	National economy	Territorial scale; spatial analysis and assessment (first biophysical assessment, using indicator-driven equations or, when appropriate, process-based models; and then by applying a monetary valuation methodology based on avoided damage assessment) of four ES in Italy: (i) crop pollination, (ii) outdoor recreation, (iii) flood regulation and (iv) water provision	√					√	√	Limited amount of ES accounted for; several modelling challenges identified, which need to be addressed before a methodological path for integrated ecosystem and economic accounting may be considered rigorous and reliable enough to provide a basis for standardization	3
Cavalletti, B., C. Di Fabio, E. Lagomarsino and P. Ramassa (2020). "Ecosystem accounting for marine protected areas: A proposed framework." Ecological Economics 173: 106623.	Design and implement ecosystem-flow accounts for a single economic (institutional) units, focusing on marine protected areas (MPAs) due to their direct relationship with ecosystems flows and for the latter's strong contribution to the former's productive and consumptive activities	MVES	Non-market valuation techniques compatible for the SEEA (economic system dependent on NC)		√	√		√			R-93, T	Tertiary sector; use of records from ecosystem accounting tables to populate a national Supply-Use Table (SUT); focus on the marine-related sport sector	√						√	Framework not able to investigate the relationship among welfare, economics and ecosystems; exclusive consideration of ecosystem flows, and not of environmental assets: impossibility to derive indicators of ecological sustainability and investigate the asset-flow relationship directly	3
Corcelli, F., M. Ripa and S. Ulgiati (2018). "Efficiency and sustainability indicators for papermaking from virgin pulp—An emergy-based case study." Resources, Conservation and Recycling 131: 313-328.	Assess the environmental sustainability associated with the production of office paper, exploring the sensitivity of results to different forest management scenarios, and investigating marginal costs of achieving higher energy and material efficiency	EMA	Conventional application of EMA (production system dependent on NC)	√		√		√			C-170	Secondary sector; production of paper from Spruce/Pine, Eucalyptus and Poplar plantations respectively in Sweden, Brazil and Italy (FU = 1 ton of produced office paper)	√	√				√		Not explicit reference to NCA	2
Dong, H., Z. Feng, Y. Yang, P. Li and Z. You (2021). "Sustainability assessment of critical natural capital: a case study of water resources in Qinghai Province, China." Journal of Cleaner Production 286: 125532.	Calculate the blue water consumption of Qinghai Province (China) and its cities (prefecture-level administrative divisions), China, from 2005 to 2017, and compare this consumption with the freshwater use indicator of the planetary boundaries (PBs) framework through bottom-up downscaling	LCA	Territorial-based perspective water footprint analysis (economic system dependent on NC)	√			√			√	Urban/Regional economy	Territorial scale; analysis of water footprint consumptions by economic sector, over time (historical early time-series: 2005-2017) and space (city to regional scale: prefecture-level administrative divisions)		√				√		The accounting model only focuses on the water resource and does not consider key processes and variables inherently important to represent the Earth system and the water cycle, which can add accuracy and information to account for additional ecosystem services at higher resolutions	2
Dong, X. B., B. H. Yu, M. T. Brown, Y. S. Zhang, M. Y. Kang, Y. Jin, X. S. Zhang and S. Ulgiati (2014). "Environmental and economic consequences of the overexploitation of natural capital and ecosystem services in Xilinguole League, China." Energy Policy 67(0): 767-780.	Evaluate the natural capital and environmental services of Xilinguole League in the Inner Mongolia Autonomous Region (China), in order to address the demand for environmental support of this economy as well as the environmental and economic sustainability in the area	EMA	Emergy evaluation of natural capital and ecosystem services, investigating the flows and storage of resources in the grasslands of Xilinguole within the framework of the local economy and the entire Inner Mongolia region	√		√				√	Regional economy	Territorial scale; emergy-based biophysical and economic valuation of ecosystem services, renewable and non-renewable resources and environmental assets in the region of Xilinguole grassland in Inner Mongolia, China	√	√		√		√	√	Potential lack of representativeness in the calculation of unit emergy values, as well as about the consistency associated with the emergy-based economic valuation	3
Esen, S. E. and L. Hein (2020). "Development of SEEA water accounts with a hydrological model." Science of the Total Environment 737: 140168.	Develop water accounts with the use of a hydrological model (SWAT - Soil and Water Assessment Tool), applying it in the Buyuk Menderes Basin in Turkey to estimate the key hydrological parameters required for water accounting, and adapting and linking SWAT to SEEA water accounts	SEEA	Development of supply and use tables and asset accounts, following the SEEA water for the year 2014, and exploring how water accounts can inform policy-making using the SWAT model, which is particularly suitable for interpreting the relation between land use and water flows		√		√		√		A, B, C, D, E, F	Several sectors among primary, secondary and households, making use of water: compilation of physical supply and use accounts, complemented with physical water resource asset accounts following the SEEA water, and applied to represent the Buyuk Menderes basin (Turkey) that covers an area of about 24,976 km^2 and has a population of about 2.7 million people		√				√		Only water provisioning services are accounted for, and compiling a SWAT model is a data-intensive and challenging undertaking; moreover, in the case of countries that are part of transboundary watersheds, SWAT requires data for the whole basin or sub-basin that would, therefore, need to be shared between countries	2
Fairbrass, A., G. Mace, P. Ekins and B. Milligan (2020). "The natural capital indicator framework (NCIF) for improved national natural capital reporting." Ecosystem Services 46: 101198.	Present, alongside example indicators, an integrated Natural Capital Indicator Framework (NCIF), which sits within a wider context of indicators related to natural, human, social and manufactured capital, and associated flows of benefits	SEEA	The NCIF represents an illustrative structure for countries to select and organise indicators to assess their use of, and dependence on, natural capital; it is intended to be consistent with the conceptual framework and broad asset categories from the System of Environmental Economic Accounting (SEEA), and with the categories of flows from natural capital from the Common International Classificat…		√	√				√	National economy	Territorial scale; the NCIF can incorporate the full range of a country’s natural assets, the biophysical flows from those assets, the human inputs which may have co-produced these biophysical flows, the benefits deriving from those flows, and the physical residuals from them	√	√		√		√	√	Several steps are suggested for building the international process that may serve to make the NCIF widely used, by refining and formalising a coherent and flexible framework of NC indicators specifically tailored to the practical requirements of policy decision-making about sustainable development	1
Farrell, C. A., L. Coleman, D. Norton, M. Kelly‐Quinn, S. Kinsella, C. Obst, M. Eigenraam, C. O'Donoghue, I. Sheehy, F. Smith and J. C. Stout (2022). "Applying ecosystem accounting to develop a risk register for peatlands and inform restoration targets at catchment scale: a case study from the European region." Restoration Ecology in press, doi: 10.1111/rec.13632.	Develop a risk register for peatlands in two contrasting catchments in Ireland by aligning the System of Environmental Economic Accounting–Ecosystem Accounting (SEEA EA) framework with risk assessment tools	SEEA	Combination of multidisciplinary tools of ecosystem accounting and risk assessment for developing a risk register for flows of peatland services and benefits at catchment scale, and identifying areas where restoration presents opportunities to maximize return on investment for multiple policy-relevant benefits for climate, water, biodiversity, and people	√			√			√	Watershed economy	Territorial scale; two catchment areas selected, the Dargle and the Figile, as they have a relatively high cover of peatlands (25 and 36%, respectively) and reflect a subsample of peatland types in Ireland	√					√		Limited data availability to perform a comprehensive ecosystem accounting; the use of the proposed tool for supporting peatland restoration across Europe is still far from being operational	2
Farrell, C., L. Coleman, M. Kelly-Quinn, C. Obst, M. Eigenraam, D. Norton, C. O'Donoghue, S. Kinsella, O. Delargy and J. Stout (2021). "Applying the System of Environmental Economic Accounting-Ecosystem Accounting (SEEA-EA) framework at catchment scale to develop ecosystem extent and condition accounts." One Ecosystem 6: e65582.	Apply nationally available datasets at catchment scale in Ireland, following the System of Environmental Economic Accounting-Ecosystem Accounting (SEEA-EA) framework, and highlighting findings specifically in relation to the development of ecosystem extent and condition accounts	SEEA	Use of CORINE land cover data and additionally remote sensing data (to provide higher resolution at catchment scale), and condition data, to a pilot catchment scale area in Ireland, which represents a distinct biophysical landscape unit with well-defined boundaries, forming the basis at which reporting is carried out under the EU Water Framework Directive (WFD)	√		√				√	Watershed economy	Territorial scale; CORINE landcover mapping as the basic data for extent and type of ecosystems (total area covered: 178 km^2; Dargle region, located on the east coast south of Dublin City), distinguishing woodlands and forest, peatland and heathland, grasslands and cropland and urban areas, with limited coverage of linear freshwater rivers, hedgerows, and coastal ecosystems				√		√		Limited site-level survey data available; several other data gaps identified with the use of CORINE land cover datasets; no explicit link with ecosystem service changes provided (focus limited on ecosystem extents and conditions)	1
Gentile, R. M., N. M. Malepfane, C. van den Dijssel, N. Arnold, J. Liu and K. Müller (2021). "Comparing deep soil organic carbon stocks under kiwifruit and pasture land uses in New Zealand." Agriculture, Ecosystems & Environment 306: 107190.	Investigate the hypothesis that kiwifruit production can increase subsoil soil organic carbon (SOC) stocks through the measurement of total SOC and N in soils from multiple paired sites of kiwifruit production and pasture land use in the Bay of Plenty and Waikato regions of New Zealand	BVES	Soil sampling, lab and statistical analyses (experimental design to determine benefits on NC due land use conversion to perennial horticulture)	n/a	n/a		√	√			A-122	Primary sector; characterisation of SOC and N stocks in multiple permanent agriculture (kiwifruit orchard) and pasture lands		√				√		Not explicit reference to NCA; limited number of NC elements evaluated	1
Gómez-Baggethun, E. and D. N. Barton (2013). "Classifying and valuing ecosystem services for urban planning." Ecological Economics 86: 235-245.	Draw on recent developments in ecosystems service research to synthesize knowledge to classify and value ecosystem services for urban planning, examining how different values of ecosystem services provided in urban areas may be captured and measured, and how they can be used to inform urban planning	MVES	Roadmap for the classification and valuation of ecosystem services in support of urban planning decision-making, by categorizing important ecosystem services and disservices in urban areas, describing valuation languages (economic costs, socio‐cultural values, resilience) that capture distinct value dimensions of urban ecosystem services, and identifying analytical challenges for valuation to inf…	√			√			√	Urban/Local economy	Territorial scale; identification of the dependency of urban systems from the supply of ES in cities, mainly focusing on approaches for economic valuation of ecosystem services in different urban planning contexts	√					√	√	Research on urban ecosystem services should broaden its present focus on biophysical and economic measurement so as to better capture and articulate non-economic values in decision making and planning	2
Grammatikopoulou, I. and D. Vačkářová (2021). "The value of forest ecosystem services: A meta-analysis at the European scale and application to national ecosystem accounting." Ecosystem Services 48: 101262.	Systematic literature review of forest valuation studies conducted in Europe during 2000–2017, aimed at providing an updated insight on the monetary values of forest ES through the employment of a meta-regression analysis, and at exploring the use of Benefit Transfer (BT) estimates in ecosystem accounting by carrying out an empirical application of value transfers for the Czech Republic in light …	SEEA	Empirical meta-regression model with value transfer errors computation for the analysis of BT values accuracy, derived from cost-based, price-based, stated revealed, and other methods, and used to account for the dependency of economic sectors (in Use Table of SEEA for Czech Republic) from forest ES flows		√		√		√		A-1, A-2, C, D, E, F, H, T, U	Several sectors among primary, secondary and households, with an application of BT results for compiling supply and use forest ES accounts for the Czech Republic	√						√	The proposed method still remains questionable due to the great variation in how primary valuation studies are reported and the lack of guidelines with reference to its application in ecosystem accounting as such	3
Grilli, G., S. Ferrini, T. Luisetti and R. Kerry Turner (2021). "The role of choice experiments in natural capital accounting approaches: fast track versus simulated exchange value in the Deben Estuary saltmarshes." Journal of Environmental Planning and Management 65(7): 1281-1300.	Consider how ES provided by a saltmarsh area could be included in an NCA framework using fast track strategies (e.g., using country-wide secondary information for local level applications) and contrast this with simulated exchange value results derived from a primary choice valuation study	MVES	Choice Experiment approach to gather public preferences for the recreational use of the Deben Estuary saltmarsh in Suffolk (NC of the analysis)		√		√	√			R-93	Tertiary sector; economic characterisation of the NC (saltmarch in the Deben Estuary) using simulated exchange values	√				√		√	Several assumptions (e.g., about the institutional market setting, fixed costs and negligible marginal costs, etc.) make the proposed model potentially inappropriate when analysing ecosystem services other than the recreational services considered in this study	1
Grondard, N., L. Hein and L. G. J. Van Bussel (2021). "Ecosystem accounting to support the Common Agricultural Policy." Ecological Indicators 131: 108157.	Explore how the System of Environmental-Economic Accounting - Ecosystem Accounting (SEEA EA) can support the monitoring and evaluation of the Common Agricultural Policy (CAP) environmental objectives, focusing on the Netherlands and the themes of nitrogen pollution and farmland biodiversity	SEEA	SEEA model of a Dutch farming landscape using causal-chain indicators elaborated according to the Driving forces – Pressures – State – Impacts - Responses (DPSIR) framework	√		√		√			A-15	Primary sector; application of DPSIR indicators on a SEEA model of Dutch farming landscape to support the monitoring and evaluation of CAP environmental objectives	√	√	√			√		Uncertainties associated with the use of indicators and spatially-explicit datasets; need to expand the scope of the accounts (e.g., including bird species spatial distribution data) and to apply the model to a real case study	3
Guedes, G. R., L. K. VanWey, J. R. Hull, M. Antigo and A. F. Barbieri (2014). "Poverty dynamics, ecological endowments, and land use among smallholders in the Brazilian Amazon." Social Science Research 43: 74-91.	Estimate the empirical relationship between two types of capitals (natural and biophysical) and poverty status as well as the time spent as poor, among rural households deriving their livelihoods from small-scale agropastoral activities in one region of the Amazon	BVES	Markovian approach to estimating the time in poverty (analysis of the link between poverty of rural populations and local NC availability and environmental degradation)	√		√		√			A-1	Primary sector; use of longitudinal data on rural farmers and a novel simulation method to investigate the impact of natural and biophysical capitals on poverty dynamics among rural smallholders in the Amazon				√	√			Not explicit reference to NCA; unspecified number of NC elements evaluated	1
Güldner, D. and F. Krausmann (2017). "Nutrient recycling and soil fertility management in the course of the industrial transition of traditional, organic agriculture: The case of Bruck estate, 1787–1906." Agriculture, Ecosystems & Environment 249: 80-90.	Develop of different patterns in nutrient cycling based on a quantitative long term socio-ecological assessment of nitrogen and phosphorus flows across the historical agro-ecosystem of the estate Bruck in eastern Austria, from 1787 to 1906, tracing the transition from traditional, organic to industrial farming	BVES	Application of the Finn cycling index (FCI), which represents the fraction of nutrients recycled on-farm before leaving the system: correlation between growing system performance and improved internal nutrient cycling based on nutrient balances and input-output analysis	√		√		√			A-1	Primary sector; long term socio-ecological research approach (LTSER) to investigate the intensification of cropping and livestock practices and their impact on nutrient balances within the farming estate in eastern Austria	√	√				√		Not explicit reference to NCA; the research does not offer guidelines to solve current questions of sustainable intensification in farming systems	2
Heris, M., K. J. Bagstad, C. Rhodes, A. Troy, A. Middel, K. G. Hopkins and J. Matuszak (2021). "Piloting urban ecosystem accounting for the United States." Ecosystem Services 48: 101226.	Develop urban ecosystem accounts in the U.S. using the SEEA EEA framework, and modelling two ecosystem services specifically (heat mitigation and rainfall interception by trees) in order to estimate their associated energy savings for indoor cooling	SEEA	Characterization of urban ecosystem extent, condition, and services contributing to national-scale accounts for land, water, and a subnational ecosystem account for a 10-state region in the U.S. Southeast	√		√				√	Urban/Regional economy	Territorial scale; U.S. cities with population over 50,000	√					√	√	Models should be updated annually, though current limitations may make updates every few years more realistic, as new data become available; limited accuracy and representativenness of data for certain parameters (some simplifying assumptions necessary to apply urban ES models at the national scale)	3
Hossaini, N., K. Hewage and R. Sadiq (2017). "Path toward net-zero buildings: a natural capital assessment framework." Clean Technologies and Environmental Policy 20(1): 201-218.	Develop a methodology for assessment of natural capital to achieve net-zero targets in buildings, evaluating how local natural resources can be used by the building (using a Living Building Challenge® registered building) to become self-sufficient with net-zero impact, and including an off-site carbon offset program for buildings that cannot reach this net-zero impact from the on-site natural res…	LCA	Typical LCA approach (further supported by life cycle cost (LCC) analysis) where the NC assessment is conducted for three modules: energy, water and building materials	√		√			√		F-41	Secondary sector; case study of a 7335-m^2 institutional building located in Penticton, British Columbia, Canada, which includes classrooms, offices, teaching workshops, gymnasium and exercise area		√				√	√	Limited focus on the three most important components of NC related to building and construction (water, energy and materials)	3
Islam, K., R. Yokoi, M. Motoshita and S. Murakami (2022). "Ecological footprint accounting of mining areas and metal production of the world." Resources, Conservation and Recycling 183: 106384.	Calculate the Ecological Footprint (EF) of built-up and carbon absorption land for global mining activities with the support of life cycle inventory datasets, and correcting the yield and equivalence factors of built-up land	EFA	EF accounting of mining that considers mine features, metals produced, mine types, and countries for comparison, showing the dependency of countries from the consumption of metals and minerals using the EF accounting metric; demand and supply of metals from the mining areas (and thus the dependency of human systems from this NC stock) is quantified using the virtual unit of global hectare (gha), …	√		√		√			B-7	Primary sector; calculation of EF of the built-up land associated with mining areas producing copper, gold, silver, platinum group elements (PGEs), molybdenum, lead-zinc, nickel, uranium, and diamonds from 295 mines of 43 countries, and calculation of the future EF of carbon absorption land associated with primary metal production for 2010–2100 in 128 mines		√				√		High uncertainty associated with the calculation of greenhouse gas (GHG) emissions generated by mines on a global scale; ecological assets and ecosystem services other than carbon stock and sequestration not accounted for (typical issue of any EFA)	2
Islam, M. and S. Managi (2021). "Valuation of nature’s contribution in Ladakh, India: an inclusive wealth method." Sustainability Science 17(3): 905-918.	Use an inclusive wealth method and geographic information system (GIS) with statistical analysis to estimate the NC of Ladakh, India, as a pioneer effort to calculate nature’s contribution to the Himalayan plateau and discuss the policy to ensure sustainable management of the natural resources	WEA	Inclusive wealth method upgraded to include detailed regional-level data and based on the calculation of the value of economic sectors producing resources and ecological assets from the local natural capital		√		√			√	Regional economy	Territorial scale; hybrid model focusing on total wealth calculation in monetary terms to detect the change in NC between 1990 and 2018 in Ladakh, Jammu and Kashmir (India)		√		√			√	ES are not explicitly considered; limitation in terms of natural capital stocks representation and data availability (e.g., lack of a detailed map about the distribution of fossil fuels and the minerals in Ladakh)	2
Jendrzejewski, B. (2020). "Bioeconomic modelling – An application of environmentally adjusted economic accounts and the computable general equilibrium model." Land Use Policy 92: 104431.	Integrate NC values into Supply and Use Tables (SUTs) to illustrate depletion of forest due to natural disaste, and applying computable general equilibrium (CGE) models to demonstrate economy wide effects of a real event in which hurricane felled almost 80 thousands hectares of trees in Polish forests in 2017	SEEA	SEEA Central Framework structure intergrated into natiuonal SUTs, made to demonstrating how NC data can be used for policy analysis through the use of a CGE model	√			√		√		A-2	Primary sector; 10% decrease of inventories stock in the forestry sector providing economy-wide impacts; the study integrates an exemplary natural resource — standing wood in state-owned forests — into SUTs, based on the asset value accounts and combined accounts approach (where the data represent consolidated monetary/physical information in terms of depletion adjusted aggregates)		√					√	Challenges related to the compatibility between economic and environmental accounts, the problem of double counting and sources of data (e.g., directly observed or computed), and also related to the NCA, which include greenwashed figures, nature valuation, data gaps or inconsistent methodologies	2
Jones, L., M. Vieno, A. Fitch, E. Carnell, C. Steadman, P. Cryle, M. Holland, E. Nemitz, D. Morton, J. Hall, G. Mills, I. Dickie and S. Reis (2019). "Urban natural capital accounts: developing a novel approach to quantify air pollution removal by vegetation." Journal of Environmental Economics and Policy 8(4): 413-428.	Develop a sophisticated approach to calculate a natural capital account for pollution removal by urban vegetation, using Great Britain as an example and applying it to encompass all urban areas across the country	BVES	Use of an atmospheric dispersion model (EMEP4UK, which provides outputs for thirteen pollutants, of which six are routinely implicated in health impacts: SO2, PM10, PM2.5, NO2, NH3 and O3) to calculate changes in pollutant concentrations as a result of pollution removal by vegetation, which help estimating the health benefits (and thus the dependency of human helth from NC) in terms of reduced re…	√			√			√	National economy	Territorial scale; estimatation of the economic value as Net Present Value and the 100-year asset value for urban natural capital across Great Britain (urban woodland, grassland and water), demonstrating a reporting of the asset account, the physical flow account, as well as health and monetary accounts	√					√	√	Only the air pollution removal service is accounted for; spatial resolution of the chemical interactions should be improved, allowing finer scale planning of the best locations for urban natural capital to achieve maximum benefit in reducing exposure of the population to harmful levels of air pollution	2
Keith, H., M. Vardon, C. Obst, V. Young, R. A. Houghton and B. Mackey (2021). "Evaluating nature-based solutions for climate mitigation and conservation requires comprehensive carbon accounting." Science of the Total Environment 769: 144341.	Propose a new comprehensive approach to carbon accounting based on the whole carbon cycle, covering both stocks and flows, and linking changes due to human activities with responses in the biosphere and atmosphere, with an illustration for the case study forest region in the Central Highlands of Victoria, Australia	SEEA	Holistic and comprehensive accounting of carbon stocks and flows that meets the statistical standards required for environmental-economic accounting (under the SEEA framework) and provides the information relevant to support decisions regarding nature-based solution (NbS) actions for mitigation under the Paris Agreement	√		√		√			A-2	Primary sector; integrated account of ES supply and use of carbon sequestration and carbon storage, products and emissions, with data flows generated for the Central Highlands (of Victoria, Australia) ecosystem accounting area average annual MtC over 2011–2015	√					√		Limited focus to one ES only (climate regulation service); main challenges identified on the measurement of total carbon stocks and stock changes in all components in the biosphere and accumulation in the economy	3
La Notte, A. (2022). "Ecologically Intermediate and Economically Final: The Role of the Ecosystem Services Framework in Measuring Sustainability in Agri-Food Systems." Land 11(1): 84.	Report on the possible accounting approaches that can be used to assess crop provision, as well as their meanings and implications from an ecological to an economic perspective, being crop provision an example of how ecological processing could be represented as one integrated flow or as many individual flows	SEEA	Quantitative assessment based on the Knowledge Implementation Project on the Integrated system for Natural Capital and ecosystem services Accounting (KIP-INCA) applications, being the KIP-INCA project a European partnership meant to test, implement, and (in this case) further develop the SEEA Experimental Ecosystem Accounts initial guidelines in Europe; an emergy-based approach is proposed as one…	√		√		√			A-1	Primary sector; development of supply and use tables to account for several ES contributing to crop provision and to the agricultural sector	√						√	Oversimplification of the model associated with an aggregation of flows to avoid double counting; an assessment that embeds all regulation and maintenance services as intermediate by default cannot include all ES, and cannot enable an analysis of the trends that take place in each ES flow	3
La Notte, A. and S. Dalmazzone (2018). "Sustainability assessment and causality nexus through ecosystem service accounting: The case of water purification in Europe." Journal of Environmental Management 223: 964-974.	Explore in depth and test the connection between ecosystem services and economic accounts, building on a former water purification case study and working on biophysical data disaggregated at the national level for 34 countries, to show how they link with national accounts and what information can be obtained by connecting ecological and economic information	SEEA	Experimental application of Supply-Use tables to water purification within the SEEA EEA framework, considering ecosystem units providing service flows as institutional sectors, and thus accounting for what happens to ecosystem units while interacting with economic units	√		√				√	National economy	Territorial scale; reporting of the results aggregated at the European and at the national scales	√					√	√	Only the water purification service is accounted for; the model presents a simple and basic use of data at country scale	2
Lai, T.-Y., J. Salminen, J.-P. Jäppinen, S. Koljonen, L. Mononen, E. Nieminen, P. Vihervaara and S. Oinonen (2018). "Bridging the gap between ecosystem service indicators and ecosystem accounting in Finland." Ecological Modelling 377: 51-65.	Explore how Finnish ES indicators could be integrated into ecosystem accounting and how future work related to such integration could support the final goal of including ES into Finnish environmental-economic accounts, using two case studies of ecosystem accounting: for (1) water-related ES, and (2) fish provisioning services from marine ecosystems	SEEA	Pilot framework for the evaluation of data availability and the potential ways to integrate Finnish ES indicators into national environmental-economic accounts, adopting SEEA EEA approaches and evaluating the outcomes from the Common International Classification of Ecosystem Services (CICES) and the Mapping and Assessment of the Ecosystems and their Services (MAES) processes	√		√			√		A-31, R-93 + others	Several sectors among primary, secondary and tertiary ones for the case study about water-related ES; Primary (fishing sector) and tertiary (sport and leisure activities) sectors for the second case study	√					√	√	Limited data availability to estimate ecosystem contributions over time; some other challenges identified for the definition of sustainability thresholds in the use of indicators	3
Lankia, T., M. Neuvonen, E. Pouta, T. Sievänen and J. Torvelainen (2020). "Outdoor recreation in ecosystem service accounting: pilot accounts from Finland." Scandinavian Journal of Forest Research 35(3-4): 186-197.	Conduct a national-level pilot accounting for nature-based recreation in open access conditions in Finland following the SEEA EEA framework	SEEA	Model describing how it is possible to account for recreational services, and how different national data sources serve recreation accounting in both physical and monetary terms; monetary valuation based on the travel cost method (and the number of visits to natural areas) and applying a simulated market approach		√	√				√	National economy	Territorial scale; annual number of recreational visits to nature areas, and preliminary estimate of the value of visits in monetary terms	√				√		√	Several data gaps identified during the process of building pilot accounts for outdoor recreation; moreover, some population groups missing in the survey exercise; only recreational services accounted for by land cover and not specifically by sector	2
Laterra, P., L. Nahuelhual, M. Gluch, X. Sirimarco, G. Bravo and A. Monjeau (2019). "How are jobs and ecosystem services linked at the local scale?" Ecosystem Services 35: 207-218.	Determine the extent to which ecosystem services (ES) supply at municipality scale relates to local employment in different regions and economic sub-sectors in Argentina, and determine the multiplier effect of employment in the economic activities most dependent on natural capital (tourism, crop production, animal production, and fishery production), on the employment in the rest of the economy s…	WEA	Framework to understand the influence of local ES supply on the indirect benefits obtained from natural capital estimated as the number of jobs along different economic sub-sectors, building on a statistical correlation model that attempts to relate land use/land cover (LULC) categories and an Ecosystem Service Provision Index (ESPI) with matrices of employment multiplicative factors		√	√			√		A, I	Primary and tertiary sectors; in particular, the model focuses on the dependence of the employment in tourism, crop, animal and fishery productions, on local ES supply	√				√			The model does not allow understanding the multiple array of factors that determine employment levels at a given moment in a given locality: static approach which assumes equilibrium conditions (it cannot incorporate the influence of social, economic, cultural and/or environmental dynamics)	2
Li, Z., Z. Zhu and S. Xu (2021). "Competition and Exploitation for Ecological Capital Embodied in International Trade: Evidence from China and Its Trade Partners." Sustainability 13(18): 10020.	Use the ecological footprint (EF) measured by the optimized product land-use matrix (PLUM) method to quantifying ecological capital for the value of macroecological resources (i.e., aggregate of single resources) in China and its economic partners, and then adopt the ecological network analysis (ENA) method to construct a complete transfer network of trade-embodied ecological capital, applying an…	EFA	Model that considers the international trade of China and its partners from 2002 to 2017 as a case study, using EF improved with PLUM to account for ecological capital (set of single natural resources), and then incorporating the PLUM method into the ENA method	√			√			√	National economy	Territorial scale; 39 countries considered including China, using the world input-output database (WIOD) as main source of data for trades, land uses and related embodied ecological capital transfer flows				√		√		ES not explicitly considered; several data gaps identified in the use of WIOD which can compromise the accuracy of trades related data and the associated EF calculations	1
Maher, S. M., E. P. Fenichel, O. J. Schmitz and W. L. Adamowicz (2020). "The economics of conservation debt: a natural capital approach to revealed valuation of ecological dynamics." Ecological Applications 30(6): e02132.	Propose a new approach for natural asset pricing of species with passive value that can be incorporated into national sustainability wealth accounting, explicitly considering the relationship between prevailing institutions, species interactions, and ecosystem dynamics, and illustrating it with the case of threatened woodland caribou in the Alberta Oil Sands	WEA	The model directly links species interactions and their associated ecological functions as part of valuation to quantify the revealed marginal social value of a natural capital stock that provides services that never directly enter the market		√	√		√			B-6	Primary sector; case study on prospective restoration/conservation investment scenarios against oil and gas industry impacts to stem caribou decline				√			√	Not explicit reference to NCA; limited number of NC elements evaluated	1
McGrath and Hynes (2020). "Approaches to accounting for our natural capital: applications across Ireland." Biology and Environment: Proceedings of the Royal Irish Academy 120B(2): 153.	Discuss recent research that examines Ireland’s Genuine Savings (GS) from 1990–2016, which are changes in comprehensive national wealth measured in monetary terms, and detail the different approaches to NCA related to the SEEA framework currently being undertaken across the country	WEA	Several NCA frameworks are reviewed, but the GS is promoted as a leading indicator of the capital approach to be developed for inclusion within the economic component of any sustainable development indicator set		√	√				√	National economy	Territorial scale; whole Ireland economy		√		√			√	Environmental asset accounts in NCA is still lacking	3
Monge, J. J. and G. W. McDonald (2020). "The Economy-Wide Value-at-Risk from the Exposure of Natural Capital to Climate Change and Extreme Natural Events: The Case of Wind Damage and Forest Recreational Services in New Zealand." Ecological Economics 176: 106747.	Develop a probabilistic and system-wide bio-economic model to measure extreme economic impacts from natural events using the financial concept of Value at Risk (V@R), and applying this metric to assess the economy-wide impact from the disruption of mountain-biking recreational services in the Whakarewarewa peri-urban forest in Rotorua, New Zealand, from a potential windthrow event	MVES	Stochastic modelling approach capable to quantify the impact of natural disasters on the decrease of ecosystem services, highlighting the direct and indirect dependency of economic sectors on the disruption of natural capital	√			√	√			R-93	Tertiary sector; the recreation and mountain biking area of Rotorua, New Zealand, is used as a case study for its relevance to the urban forest-dependent regional economy	√						√	Caveats in the methodology and data used, e.g. the model does not capture changes of economic structure over time, does not consider substitution nor adaptation effects	1
Morri, E. and R. Santolini (2021). "Ecosystem Services Valuation for the Sustainable Land Use Management by Nature-Based Solution (NbS) in the Common Agricultural Policy Actions: A Case Study on the Foglia River Basin (Marche Region, Italy)." Land 11(1): 57.	Evaluate ES from agricultural land (e.g., food, maintenance of soil structure, and hydrological services) in different scenarios in the upper Foglia river basin (Italy) and at a local scale (farming), in order to highlight the issue of compensating farmers for the production of public goods which benefit the whole society (ES) by the implementation of Rural Development Programs' (RDP) actions (in…	BVES	Land use-based model to assess ES as a benefit to the population provided by natural capital, associated with the water regulation (quality and quantity), soil erosion and N adsorption, built to compare different scenarios provided by agriculture practices as derived from the RDP scheme (2014–2020) in an ecological Functional Unit (sub-basin of the Foglia river, Central Apennines) and at the loca…	√			√			√	Watershed economy	Territorial scale; biophysical (land use change-based) and monetary (benefit transfer-based) evaluation of ES at basin and farming system scale	√					√	√	Only selected regulation ES provided by agroecosystems assessed; model far from being operational for NCA	1
Obst, C. and M. Vardon (2014). "Recording environmental assets in the national accounts." Oxford Review of Economic Policy 30(1): 126-144.	Describe the treatment of environmental assets within the national economic accounts and summarize recent developments (with a focus on the resource accounting and balance sheet for Australia) that extend the accounting approaches as described in the United Nations’ System of Environmental-Economic Accounting (SEEA)	SEEA	Preliminary NCA model based on the SEEA framework for Australia, established to showcase the potential for implementation of accounting standards for environmental assets at national scale		√	√				√	National economy	Territorial scale; aggregation of resource stock and flow data in the national economic balance sheet for Australia, with chain volume measures done between 2006 and 2012		√				√	√	ES not explicitly accounted for; only natural resources with an economic trade value are considered	1
Ogilvy, S. and M. Vail (2018). "Standards-compliant accounting valuations of ecosystems." Sustainability Accounting, Management and Policy Journal 9(2): 98-117.	Explore different methods, i.e., approaches to valuation described in the SEEA and Australian Accounting Standards (AASs), that may assist agricultural (livestock grazing) enterprises to estimate the monetary value of the productive capacity of the ecosystems they use	SEEA	Empirical monetary valuation of production ecosystems applied to a model enterprise of livestock grazing, where five methods are tested and compared in order to estimate the economic contribution of ecosystem services and assets to the investigated economic sector and their compliance with SEEA and AAS		√		√	√			A-14	Primary sector; the model enterprise is 45,000 acres near Blackall, Queensland, Australia, running a rolling 10-year (longterm) average total number of 2248 head (AE) of cattle	√			√			√	Only one out of five methods tested results to be somehow compatible with SEEA and AAS frameworks (i.e., the replacement cost method)	2
Ogilvy, S., D. O'Brien, R. Lawrence and M. Gardner (2022). "A natural capital accounting framework to communicate the environmental credentials of individual wool-producing businesses." Sustainability Accounting, Management and Policy Journal 13(4): 765-802.	Identify and describe methods to provide the farmlevel information needed for environmental performance and sustainability reporting frameworks, demonstrating them by compiling NC accounts and environmental performance information for two wool producers in the grassy woodland biome of Eastern Australia	SEEA	Site-specific information about the type and condition of NC (ecosystem assets) are used to improve the established Environmental Profit and Loss statement (EP&L) method, making it compatible for the SEEA and conceptualising the extent of ES change due to the land being used for agriculture as proportional to the change in ES relative to those produced by the original biome of the property (refer…	√			√	√			A-14	Primary sector; the model analyses resource uses of two comparable farms producing wool in the sheep-wheat zone of Australia	√			√		√		Data accuracy is a critical aspect; producers may also be impacted by the time-consuming effort in collecting data to informing the EP&L framework	3
Oliveira, B. M., R. Boumans, B. D. Fath and J. Harari (2022). "Socio-ecological systems modelling of coastal urban area under a changing climate – Case study for Ubatuba, Brazil." Ecological Modelling 468: 109953.	Create a new simulation of a coastal socio-ecological systems (SES) from Brazil (for Ubatuba, a coastal city highly dependent and influenced by tourism) that is able to integrate several climatic and social variables through a dynamic and coupled model, and forecast its behavior in the future according to scenarios	BVES	Development of a systems dynamics simulation model using MIMES (Multiscale Integrated Model of Ecosystem Services), which can capture the contribution of natural capital to the socio-economic system and its feedback loops impacting the coastal fish populations	√		√		√			R-93	Tertiary sector; tourism sector influencing, and impacted by, the dynamics of fish populations in the coastal area of Ubatuba (Brazil)	√	√		√		√		Not explicit reference to NCA and limited focus on population dynamics; issues for spatial data coverage and their accuracy	1
Ovando, P., P. Campos, J. L. Oviedo and A. Caparrós (2016). "Ecosystem accounting for measuring total income in private and public agroforestry farms." Forest Policy and Economics 71: 43-51.	Develop an ecosystem accounting system to estimate individual products' biophysical and total income indicators, applying it to a group of 39 agroforestry farm case studies in Andalusia, Spain, and providing results for two farming groups: publicly owned coniferous forest and privately owned native hardwood forest (dehesa)	MVES	Non-market valuation techniques compatible for the SEEA (economic system dependent on NC)		√				√		A-1, A-2	Primary sector; physical and economic valuation of environmental assets (resources, ES, biodiversity, …) and contribution of ecosystem service to consumptions at farm scale	√		√	√		√	√	The model does not offer results that are statistically significant on the basis of a random survey and are restricted to an individual year	2
Paulin, M. J., R. P. Remme, D. C. J. van der Hoek, B. de Knegt, K. R. Koopman, A. M. Breure, M. Rutgers and T. de Nijs (2020). "Towards nationally harmonized mapping and quantification of ecosystem services." Science of the Total Environment 703: 134973.	Present the Natural Capital Model (NC-Model), a spatially explicit set of models for quantifying and mapping ecosystem services within the Netherlands, whose aim is to support the integration of ecosystem services within spatial planning and policy-making at the national level, contributing to the fulfilment of national and international environmental policy targets	BVES	NC-Model focuses on a mapping and assessment approach (first of all biophysical, but also economic for some aspects and where deemed more useful) of ES at urban and regional scale, to trace the dependency of economic activities on NC	√			√			√	Urban/Regional economy	Territorial scale; model developed for Dutch cities and the Netherlands; the Municipality of Amsterdam is presented as a case study	√	√				√	√	Inability to capture all relevant factors that contribute to the supply and use of ES, affecting model accuracy and hence the objectivity of assessments	3
Raymond, C. M., B. A. Bryan, D. H. MacDonald, A. Cast, S. Strathearn, A. Grandgirard and T. Kalivas (2009). "Mapping community values for natural capital and ecosystem services." Ecological Economics 68(5): 1301-1315.	Present a community values mapping method that identifies, measures and maps community values and threats towards natural capital assets and ecosystem services in the landscape to inform planning for conservation and environmental management, focusing on 56 local environmental managers and community representatives in the study area (South Australian Murray–Darling Basin (SAMDB) region)	EQA	Combination of the "landscape values methodology" and the "Millennium Ecosystem Assessment" framework to enable the measurement of the distribution and intensity of natural capital and ecosystem service values and threats; method based on concepts such as ‘sense of place’ and ‘coupled social–ecological systems’ theory, driven by participatory processes	√			√			√	Regional economy	Territorial scale; qualitative data about values and threats collected through surveys with local communities and stakeholders, then spatially represented	√				√			Not explicit reference to NCA; only qualitative scoring assigned to value ES	2
Reddy, S. M. W., R. I. McDonald, A. S. Maas, A. Rogers, E. H. Girvetz, J. North, J. Molnar, T. Finley, G. Leathers and J. L. DiMuro (2015). "Finding solutions to water scarcity: Incorporating ecosystem service values into business planning at The Dow Chemical Company’s Freeport, TX facility." Ecosystem Services 12: 94-107.	Demonstrate how businesses can use economic valuation of natural capital to improve business planning and risk management for a critical ecosystem service, water provision, using the case study of The Dow Chemical Company’s operations in Freeport, Texas and the surrounding Brazos River basin, and assessing the changing value of all industrial water rights in the Brazos River basin under different…	MVES	Combination between biophysical modelling simulations and monetary ES valuation methods to providing quantitative economic information on future water scarcity, to improve understanding of risk associated with NC shortage	√			√	√			E-36	Secondary sector; prospective economic assessment of water provision and associated water services in the Brazos River basin (Texas, USA)	√						√	Not explicit reference to NCA; costs and benefits reported qualitatively for some ES; uncertainty and complexity also associated with the use of climate, demand, and price forcasting data	2
Rugani, B., D. Roviani, P. Hild, B. Schmitt and E. Benetto (2014). "Ecological deficit and use of natural capital in Luxembourg from 1995 to 2009." Science of the Total Environment 468–469(0): 292-301.	Evaluate and discuss the link between consumption patterns in Luxembourg and the resulting environmental pressure on natural resources and productive land, and their territorial biocapacity response, through indicators of solar energy demand (SED) and ecological footprint (EF)	BVES	The NCA framework is based on the methodological combination between SED (and thus an emergy-based accounting approach) and EFA using the World Input Output Database (WIOD), with the aim to quantify the dependency of the Luxembourgish national economy from local and imported NC flows	√			√			√	National economy	Territorial scale; contribution over time (past time horizons, from 1995 to 2009) of imported goods and services (indirect contribution) and domestically produced goods and services (direct contribution) to final net consumption scores of SED and EF, compared against local availability of NC flows (ecological assets, productive lands, resources and some ES)	√	√		√		√		Limited focus on ES (only carbon sequestration considered) and generically to local emergy flows; uncertainty associated with the economic input-output data included in the hybrid model	3
Saladini, F., V. Gopalakrishnan, S. Bastianoni and B. R. Bakshi (2018). "Synergies between industry and nature – An emergy evaluation of a biodiesel production system integrated with ecological systems." Ecosystem Services 30: 257-266.	Evaluate how the techno-ecological synergy (TES) framework can benefit by using the emergy approach, by (i) comparing technological and ecological solutions for achieving the same goal in an engineering process, and (ii) quantifying both demand and supply of ecosystem services, as proposed by the TES framework, in emergy terms to calculate aggregated metrics	EMA	Improvement of the ES supply and demand analysis through emergy flows accounting using the TES framework, which roots on life cycle assessment modelling and quantifies the dependency of technosphere systems from the NC	√			√				C-202	Secondary sector; the emergy-based TES framework was tested by an application to a case study of a biodiesel manufacturing plant located in the US, close to Cincinnati (Ohio), which produces 16.7 t of biodiesel per year on average	√	√				√		Not explicit reference to NCA; possible inaccuracy and low-representativeness of data coverage in emergy flows accounting	2
Santagata, R., A. Zucaro, S. Viglia, M. Ripa, X. Tian and S. Ulgiati (2020). "Assessing the sustainability of urban eco-systems through Emergy-based circular economy indicators." Ecological Indicators 109: 105859.	Apply the Emergy Accounting method (EMA) to design an improved approach to circular economy (CE) systemic aspects, focusing on the importance of new indicators capable of capturing both resource generation (upstream), product (downstream) and systems dimensions	EMA	EMA indicators are suggested as tools to evaluate the implementation rate of CE patterns within local and regional systems (City of Napoli, Campania region, Italy), in order to provide useful information for policy decision making on the dependency of the local economy from imported and locally produced natural capital flows	√		√				√	Urban/Local economy	Territorial scale; the EMA scheme is built around the case study of the City of Napoli’s economy (Campania region, Southern Italy) considering the surrounding agro-industrial area with its smaller urban settlements	√	√		√		√		ES flows not explicitly considered, if not as part of the broad set of aggregated emergy flows; uncertainty may be associated with the calculation of the EMA indicators	2
Santagata, R., S. Viglia, G. Fiorentino, G. Liu and M. Ripa (2019). "Power generation from slaughterhouse waste materials. An emergy accounting assessment." Journal of Cleaner Production 223: 536-552.	Investigate energy and resource restoration from animal by-products (i.e., purified fat used as fuel for electric energy cogeneration), using an Emergy Accounting approach with the aim of evaluating benefits and environmental load of the process considering the advantages achieved compared with the demand for ecosystem services and natural capital depletion	EMA	Emergy accounting framework with analysis of multiple scenarios of by-products recovery and use, and electricity generation that depends on inputs from NC in the form of emergy flows	√		√			√		D-35, E-38	Secondary sector; electricity generation process based in Campania region (Italy) and managed by Proteg S.P.A. , a company using animal by-products (or waste) to obtain purified fat used as fuel for electric energy cogeneration of about 5.1 MW		√				√		Lack of data to assess multiple ES and not explicit reference to NCA; inventory data may suffer from limited representativeness and accuracy	2
Schwilch, G., T. Lemann, Ö. Berglund, C. Camarotto, A. Cerdà, I. Daliakopoulos, S. Kohnová, D. Krzeminska, T. Marañón, R. Rietra, G. Siebielec, J. Thorsson, M. Tibbett, S. Valente, H. Van Delden, J. Van den Akker, S. Verzandvoort, N. Vrînceanu, C. Zoumides and R. Hessel (2018). "Assessing Impacts of Soil Management Measures on Ecosystem Services." Sustainability 10(12): 4416.	Develop a methodology to assess changes in soil ES (including cultural ES) based on measured or estimated soil property changes stimulated by soil management measures (e.g., mulching, terracing, no-till), applying the ES assessment methodology in 16 case study sites across Europe representing a high diversity of soil threats and land use systems	BVES	ES assessment based on the Mapping and Assessment of Ecosystems and Their Services (MAES) approach and Common International Classification of Ecosystem Services (CICES) related indicators, with development of a qualitative impact dependence index to estimate the magnitude of changes in properties of the NC, both in the short to the long-term	√		√			√		A	Primary sector; 16 case studies of land use in Europe both in rural and urban settings, with 26 trialled measures (e.g., flood retention ponds, changes in crop and land use management, change in vegetation cover, ...) to face several soil threats (e.g., loss of organic matter, flooding and landslides, soil contamination, ...)	√				√	√		Not explicit reference to NCA; the use of weighting and estimated proxies in the calculation of NC changes lowers detail and results consistency	2
Stromberg, P. M., E. Öhrner, E. Brockwell and Z. Liu (2021). "Valuing urban green amenities with an inequality lens." Ecological Economics 186: 107067.	Examine the effect of urban green space on sales prices through hedonic study, trying to understand how implicit prices of green amenities differ across apartments in different price groups in Stockholm, Sweden	MVES	Simple log-linear model and quantile regression model for hedonic pricing to assess the distributional impact of urban green amenities, using sales data for 6614 apartments in the suburbs of Stockholm in combination with GIS data on green urban areas		√		√	√			L-68	Tertiary sector; hedonic study				√	√		√	Lack of depth regarding the factors that influence how urban ES can contribute to a more equitable outcome	2
Świąder, M., S. Szewrański, J. Kazak, J. van Hoof, D. Lin, M. Wackernagel and A. Alves (2018). "Application of Ecological Footprint Accounting as a Part of an Integrated Assessment of Environmental Carrying Capacity: A Case Study of the Footprint of Food of a Large City." Resources 7(3): 52.	Apply the ecological footprint (EF) method at the city level (Municipality ofWrocław, Poland) as a measure of ecological carrying capacity (ECC), focusing on the EF of food (EFF) and assuming that the implementation of ECC into spatial management is relevant to increase the efficient of long-term planning, the use of natural resources, as well as for the assurance of the food security in the cont…	EFA	Application of EFF and comparing hybrid EFF assessment (combining a bottom-up carbon footprint of food (CFF) based on LCA principles and life cycle inventories, with remaining top-down EFF’s components) with full top-down assessment for food EF	√			√		√		A-1, A-3, C-10, C-11	Primary and secondary sector; basket of consumed food products and their supply-chain classified originally using COICOP categories, which aggregate different ISIC classes		√		√		√		Not explicit reference to NCA, nor accounting for ES flows; data unavailability represent a major challenge to accomplish results consistency with EF methods	2
Valero, A., A. Valero and W. Stanek (2018). "Assessing the exergy degradation of the natural capital: From Szargut's updated reference environment to the new thermoecological-cost methodology." Energy 163: 1140-1149.	Show the common developments performed by the Institute of Thermal Technology and the Research Centre for Energy Resources and Consumption regarding the assessment of natural resource degradation, focusing on the last model of the Szargut's Reference Environment that was updated with new geological and geochemical information not available when it was originally developed	BVES	Development and application of the TERC methodology, which is an integration of the Exergy Replacement Cost (ERC) into the Thermo-Ecological Cost (TEC) calculation initially proposed by Szargut as a connection between exergy and ecology, where there is an updated Reference Environment, together with the new developments related to the calculation of concentration exergies of minerals through the …	√		√			√		B-7, B-8	Primary sector; calculation of thermo-ecological and exergy replacement costs for different mineral production processes		√				√		Not explicit reference to NCA; ES are not accounted for with this method	1
Vallecillo, S., A. La Notte, G. Zulian, S. Ferrini and J. Maes (2019). "Ecosystem services accounts: Valuing the actual flow of nature-based recreation from ecosystems to people." Ecological Modelling 392: 196-211.	Develop ES accounts at the European Union level, using nature-based recreation as a case study and following the current international accounting framework represented by the System of Environmental-Economic Accounting – Experimental Ecosystem Accounting (SEEA EEA)	SEEA	Adaptation and integration of different biophysical and socio-economic models, illustrating the workflow necessary for ES accounts: from a biophysical assessment of nature-based recreation to an economic valuation and compilation of the accounting tables	√			√	√			R-93	Tertiary sector; nature-based recreation accounting for the EU-28 countries in 2012	√					√	√	Analysis limited to the ES of nature-based recreation service; low data availability and consistency also represent a shortcoming	3
Vallecillo, S., A. La Notte, S. Ferrini and J. Maes (2019). "How ecosystem services are changing: an accounting application at the EU level." Ecosystem Services 40: 101044.	Present the general framework adopted by the Knowledge Innovation Project on an Integrated system for Natural Capital and ecosystem services Accounting (KIP INCA), which is focused on different methods for assessment of the actual flow of ES, and provide relevant results on ES and their changes over time, based on the best data available at the EU level	SEEA	Framework including two different approaches: 1) fast-track approach based on official statistics; and 2) spatial modelling approach based on mapping of different components of ecosystem services (potential, demand, and use or actual flow)	√			√			√	European economy	Territorial scale; ES accounts provided for the years 2000, 2006 and 2012, matching the coverage of CORINE land cover (CLC) maps	√			√		√	√	Values susceptible to change and expansions in future, before the accounting method can be consolidated	2
Vardon, M., S. May, H. Keith, P. Burnett and D. Lindenmayer (2019). "Accounting for ecosystem services – Lessons from Australia for its application and use in Oceania to achieve sustainable development." Ecosystem Services 39: 100986.	Analyse in detail the ecosystem accounts for the Australian Great Barrier Reef initially compiled by the Australian Bureau of Statistics (ABS), in order to i) connect some of the very large body of scientific work being undertaken in the region to other environmental and macro-economic information compiled by the ABS, and ii) provide feedback to the United Nations on the development of SEEA Exper…	SEEA	Ecosystem accounts for the Great Barrier produced by the Australian Bureau of Statistics (ABS), as part of the SEEA Central Framework for land, water, waste and energy covering both stocks and flows in physical and monetary measures in Australia	√		√			√		A-1, A-2, A-3, R-93	Primary and tertiary sector; analysis of the Great Barrier Reef World Heritage area, which totals 348,000 km^2 provide a number of benefits to humans in terms of primary production and tourism	√		√			√	√	Lack of detailed data; accounts too coarse to serve as a tool of direct environmental management, other than to be broadly suggestive of priorities	3
Vargas, L., L. Hein and R. P. Remme (2017). "Accounting for ecosystem assets using remote sensing in the Colombian Orinoco River Basin lowlands." Journal of Applied Remote Sensing 11(2): 026008.	Explore how remote sensing can be used to analyze ecosystems using an accounting approach in the Orinoco River Basin (South America), assessing ecosystem assets in terms of extent, condition, and capacity to supply ES	SEEA	Use of spectral information from the MODIS aqua and terra satellites for the measurement of ecosystem extent, condition, and capacity to supply ES (namely grasslands grazed by cattle, timber harvesting, oil palm fresh fruit bunches (FFB) harvesting, and carbon sequestration)	√			√		√		A-126, A-15, A-2	Primary sector; test if remote sensing spatial information can be compiled in accounting units to measure (i) ecosystem extent (derived from MODIS with 1 km^2 grid cells), (ii) condition, and (iii) ecosystem capacity to supply ES (through the net primary productivity-NPP indicator)	√					√		Several uncertainty issues associated with the extraction and use of data from remote sensing if that is integrated in ecosystem accounting	2
Wang, C., G. Shi, Y. Wei, A. Western, H. Zheng and Y. Zhao (2017). "Balancing Rural Household Livelihood and Regional Ecological Footprint in Water Source Areas of the South-to-North Water Diversion Project." Sustainability 9(8): 1393.	Understand the relationship between rural livelihood development and ecological footprint change in four water source areas of the South-to-North Water Diversion Project (SNWDP) in China over a period of 15 years	EFA	Correlation analysis between the livelihood index (comprehensive quality index of rural household livelihoods based on the five classical types of livelihood-capitals) and the yearly ecological footprint of each water source area in the SNWDP	√			√			√	Watershed economy	Territorial scale; calculation of livelihood indices and ecological footprint of rural households and their dependence on NC in four distint water source areas in China		√		√	√	√		Limited accessibility of data for some capitals (e.g., internet technologies) in the livelihood variable; the quantification of monetary value might be insufficient; more comprehensive environmental assessments through the use of LCA are recommended	1
Wang, C., Y. Wang, Y. Geng, R. Wang and J. Zhang (2016). "Measuring regional sustainability with an integrated social-economic-natural approach: a case study of the Yellow River Delta region of China." Journal of Cleaner Production 114: 189-198.	Present a social-economic-natural approach to measure regional sustainability in the Yellow River Delta region of China based on emergy theory, and chosing as the study area Dongying, core city of the Yellow River Delta High-efficient Eco-Economic Zone (YRDHEZ) in China	EMA	An integrated method of EMA is applied in order to cover the social-economic-natural system more holistically, estimating the net primary productivity (NPP) of the study area by interpretation of MOD17A3 data with the help of GIS software	√		√				√	Urban/Local economy	Territorial scale; EMA applied to assess NC dependencies of Dongying, a prefecture-level city in Shandong Province of China, located in the Yellow River Delta	√	√		√		√	√	ES flows not explicitly considered, if not as part of NPP flows and the broad set of aggregated emergy flows; uncertainty may be associated with the calculation of the EMA indicators	2
Wang, F., H. Zheng, X. Wang, W. Peng, D. Ma and C. Li (2017). "Classification of the Relationship between Household Welfare and Ecosystem Reliance in the Miyun Reservoir Watershed, China." Sustainability 9(12): 2290.	Analyse the dependency of humans on ecosystem services, the support an ecosystem provides, and the types of relationships developed among households and ecosystems in the Miyun Reservoir watershed, which is an important ecological protection zone approximately 100 km north of Beijing, China	WEA	Dependence of household welfare on the ecosystem expressed by the index of dependence on ecosystem services (IDES), defined as the ratio of net benefit (which includes at least three income sources: agricultural, rural tourism, ecological compensation, remittance, government subsidies and other non-farm incomes) obtained from the ecosystem to the absolute value of the total net benefit derived fr…		√	√		√			T	Tertiary sector; household surveys conducted in August 2014 and July 2015 in the Miyun Reservoir watershed using a participatory rural appraisal method and multistage stratified random cluster sampling method	√				√			Very limited number of ES considered, further in aggregated form	2
Wang, Y., J. Huang and S. Fang (2019). "Sustainability Assessment of Natural Capital Based on the 3D Ecological Footprint Model: A Case Study of the Shennongjia National Park Pilot." Sustainability 11(4): 956.	Implement a natural capital account system encompassing transportation, accommodation, food, and waste for both locals and tourists, in order to assess the impact of socioeconomic development on the Shennongjia National Park Pilot (SNPP), a typical national park in China	EFA	Throughout the period from 2007 to 2016, a sustainability assessment of natural capital (SANC) was conducted in SNPP based on the 3D ecological footprint (EF3D) model to measure stock consumption as well as flow occupancy	√		√					R-93	Tertiary sector; EF3D model to evaluate the impact of locals’ daily lives and tourists’ activities in the national park on the local NC		√				√		ES are not explicitly considered; limitation in terms of natural capital stocks representation; comprehensiveness and integrality of the long-term dataset difficult to obtain	1
Warnell, K. J. D., M. Russell, C. Rhodes, K. J. Bagstad, L. P. Olander, D. J. Nowak, R. Poudel, P. D. Glynn, J. L. Hass, S. Hirabayashi, J. C. Ingram, J. Matuszak, K. L. L. Oleson, S. M. Posner and F. Villa (2020). "Testing ecosystem accounting in the United States: A case study for the Southeast." Ecosystem Services 43: 101099.	Explore the potential for U.S. ecosystem accounting by compiling ecosystem extent, condition, and ecosystem services supply and use accounts for a 10-state region in the Southeast, address air quality, water quality, biodiversity, carbon storage, recreation, and pollination for selected years from 2001 to 2015	SEEA	Alignment of SEEA EEA ecosystem services supply and use tables with the National Ecosystem Services Classification System (NESCS)	√		√				√	Urban/Regional/National economy	Territorial scale; five final ES are defined for inclusion in the pilot accounts (i.e., ecological structures and fauna that are valued and used by recreational birders; reduction of air pollutants; reduction of water pollutants; wild pollination; and carbon storage), as well as their associated metrics in supply and use or condition accounts	√					√		Lack of the necessary data to develop comprehensive monetary accounts for the selected services; several key data and research gaps identified for the ES evaluated in the pilot ecosystem accounts	2
Zhang, S., Q. Shi and M. Cheng (2017). "Renewable natural capital, the Biocapacity, and subjective well-being." Journal of Cleaner Production 150: 277-286.	Empirically estimate the relationship between subjective well-being (SWB) and renewable natural capital (RNC) across countries; the RNC can be called active natural capital and maintains itself using solar energy; most of ecosystem goods and services are provided by RNC; on the contrary, the nonrenewable natural capital is more passive and almost does not provide ecosystem services until extracte…	WEA	The relationship between RNC and SWB is estimated by employing a biological proxy of RNC, i.e., BIO, which is a measure of the maximum amount of generated ecosystem goods and services within a country in a certain year; it represents the maximum biological capabilities of ecosystems to generate low-entropy raw materials and to absorb high-entropy wastes, using current management and extraction te…	√		√				√	National economy	Territorial scale; RNC serves as an independent factor in affecting and explaining national SWB levels; residents do consider the ecosystem goods and services generated from RNC when they evaluate their life conditions, especially for those who have reached a certain level of living standard				√	√			An instrumental variable of BIO has not been found and the causal relationship between RNC and SWB has not yet been proven	1
* Strong sustainability builds on the assumption that natural capital is irreplaceable and therefore essential; weak sustainability assumes that human well-being is better served if the value of all combined assets is preserved, rather than giving special attention to maintaining natural capital, since technology may be able to substitute for lost ecological services (Monfreda et al., 2004; in: L…
** Source of codes: https://unstats.un.org/unsd/classifications/Econ/Download/In%20Text/ISIC_Rev_4_english_structure.Txt
REVIEWS and GREY LITERATURE (reviewed documents: #43)				Is the dependency of the technosphere system from the NC considered?		Is there a link between NCA and LCA?
Full citation	Short description (goal and scope)	Web reference source, DOI (last access: December-2022)	Which NCA methods have been taken into account among those listed in Table SM2.2?	Qualitative statement(s)	Quantitative statement(s)	Yes, direct link	Yes, indirect link	No link
List of #21 selected functional reviews
Bagstad, K. J., J. C. Ingram, C. D. Shapiro, A. La Notte, J. Maes, S. Vallecillo, C. F. Casey, P. D. Glynn, M. P. Heris, J. A. Johnson, C. Lauer, J. Matuszak, K. L. L. Oleson, S. M. Posner, C. Rhodes and B. Voigt (2021). "Lessons learned from development of natural capital accounts in the United States and European Union." Ecosystem Services 52: 101359.	This paper synthesizes findings from 11 individual application papers from a special issue of Ecosystem Services on natural capital accounting (NCA) and their application to the public and private sectors in the EU and U.S.	10.1016/j.ecoser.2021.101359	SEEA	X				X
Banerjee, O., N. Crossman, R. Vargas, L. Brander, P. Verburg, M. Cicowiez, J. Hauck and E. McKenzie (2020). "Global socio-economic impacts of changes in natural capital and ecosystem services: State of play and new modeling approaches." Ecosystem Services 46: 101202.	This review makes a the state of the art on available models and datasets that lay the groundwork for future analytical work to inform the post-2020 agenda, and proposes an integrated modeling approach for global analysis to underpin international policy discourse and advocacy	10.1016/j.ecoser.2020.101202	BVES, MVES, WEA	X			X
Barker, R. (2019). "Corporate natural capital accounting." Oxford Review of Economic Policy 35(1): 68-87.	The paper argues that there is essentially a need for natural capital accounting and reporting systems that serve two distinct purposes	10.1093/oxrep/gry031	NCP, MVES, WEA		X		X
Bateman, I. J. and G. M. Mace (2020). "The natural capital framework for sustainably efficient and equitable decision making." Nature Sustainability 3(10): 776-783.	The paper presents a framework for natural capital analysis and decision making that links ecological and economic perspectives	10.1038/s41893-020-0552-3	BVES, MVES, WEA		X		X
Bhambhani, A., J. P. van der Hoek and Z. Kapelan (2022). "Life cycle sustainability assessment framework for water sector resource recovery solutions: Strengths and weaknesses." Resources, Conservation and Recycling 180: 106151.	This review paper discusses three critical characteristics of water sector resource recovery solutions: (i) their potential to actively benefit natural processes through reciprocal services, (ii) their dependence upon natural resources and processes, and (iii) their goal to avoid transgression of environmental thresholds	10.1016/j.resconrec.2021.106151	LCA		X	X
Bordt, M. and M. Saner (2018). "A critical review of ecosystem accounting and services frameworks." One Ecosystem 3: e29306.	This work reviews the IPBES, the SEEA EEA and 14 other ES frameworks using criteria designed to address operational and convergence considerations for national ecosystem accounting	10.3897/oneeco.3.e29306	SEEA	X				X
Buonocore, E., U. Grande, P. P. Franzese and G. F. Russo (2021). "Trends and evolution in the concept of marine ecosystem services: An overview." Water (Switzerland) 13(15): 2060.	This study reviews the global scientific literature on marine ecosystem services by focusing on the following main aspects: the definition and classification of marine ecosystem services; their loss due to anthropogenic pressures, alternative assessment, and mapping approaches; and the inclusion of marine ecosystem services into policy and decision-making processes	10.3390/w13152060	BVES, MVES	X				X
Burdon, D., T. Potts, S. Barnard, S. J. Boyes and A. Lannin (2022). "Linking natural capital, benefits and beneficiaries: The role of participatory mapping and logic chains for community engagement." Environmental Science & Policy 134: 85-99.	This paper presents a novel stakeholder-driven approach to participatory mapping which enables engagement of communities in natural capital discussions across a series of face-to-face workshops	10.1016/j.envsci.2022.04.003	EQA		X			X
D’Amato, D., B. Bartkowski and N. Droste (2020). "Reviewing the interface of bioeconomy and ecosystem service research." Ambio 49(12): 1878-1896.	This review explores the interdisciplinary space at the interface of three main (competing or complementary) bioeconomy visions emerging in scientific literature: resource, biotechnology, and agroecology	10.1007/s13280-020-01374-0	LCA, BVES	X		X
D'Amato, D., M. Gaio and E. Semenzin (2020). "A review of LCA assessments of forest-based bioeconomy products and processes under an ecosystem services perspective." Science of the Total Environment 706: 135859.	Based on a systematic review of empirical articles, this study provides insights on using LCA assessments to account for ecosystem service-related impacts in the context of bioeconomy activities	10.1016/j.scitotenv.2019.135859	LCA	X		X
Edens, B., J. Maes, L. Hein, C. Obst, J. Siikamaki, S. Schenau, M. Javorsek, J. Chow, J. Y. Chan, A. Steurer and A. Alfieri (2022). "Establishing the SEEA Ecosystem Accounting as a global standard." Ecosystem Services 54: 101413.	This paper presents the SEEA EA in terms of the various types of ecosystem accounts, its origins, purposes and applications	10.1016/j.ecoser.2022.101413	SEEA	X			X
Garcia Rodrigues, J., A. J. Conides, S. Rodriguez Rivero, S. Raicevich, P. Pita, K. M. Kleisner, C. Pita, P. F. M. Lopes, V. Roldán Alonso, S. S. Ramos, D. Klaoudatos, L. Outeiro, C. Armstrong, L. Teneva, S. Stefanski, A. Böhnke-Henrichs, M. Kruse, A. I. Lillebø, E. M. Bennett, A. Belgrano, A. Murillas, I. Pinto Sousa, B. Burkhard and S. Villasante (2017). "Marine and coastal cultural ecosystem s…	This work analyses the state of research on marine and coastal CES (cultural ecosystem services), identifies knowledge gaps, and pinpoints research priorities and the way forward	10.3897/oneeco.2.e12290	EQA, BVES	X				X
Hein, L., K. J. Bagstad, C. Obst, B. Edens, S. Schenau, G. Castillo, F. Soulard, C. Brown, A. Driver, M. Bordt, A. Steurer, R. Harris and A. Caparrós (2020). "Progress in natural capital accounting for ecosystems - Global statistical standards are being developed." Science 367(6477): 514-515.	This study highlights key advances, challenges, and opportunities associated with the first generation of ecosystem accounts now published in 24 countries, made with a push to finalize a United Nations (UN) statistical standard for ecosystem accounting by 2021	10.1126/science.aaz8901	SEEA	X			X
Kalt, G., D. Wiedenhofer, C. Görg and H. Haberl (2019). "Conceptualizing energy services: A review of energy and well-being along the Energy Service Cascade." Energy Research & Social Science 53: 47-58.	This article proposes the ‘Energy Service Cascade’ (ESC) as a conceptual framework aimed at clarifying and bridging different approaches, inspired by Haines-Young’s and Potschin’s (2011) ‘Ecosystem Service Cascade’, which distinguishes: a) structures, b) functions, c) services, d) benefits and e) values	10.1016/j.erss.2019.02.026	LCA, BVES	X		X
Kenny, D. C. (2017). "Modeling of natural and social capital on farms: Toward useable integration." Ecological Modelling 356: 1-13.	While farm modeling is not a new concept, this paper reviews various types of models with the aims of determining which is most suitable to demonstrate the effect of natural and social capital on farm risk, farm resilience, and farm well-being	10.1016/j.ecolmodel.2017.04.010	EQA, BVES	X			X
Maes, J., A. Driver, B. Czúcz, H. Keith, B. Jackson, E. Nicholson and M. Dasoo (2020). "A review of ecosystem condition accounts: lessons learned and options for further development." One Ecosystem 5: e53435.	This article reviews 23 publicly-accessible reports undertaken or commissioned by government agencies, academic and non-government organisations that discuss or present an ecosystem condition account	10.3897/oneeco.5.e53485	SEEA	X				X
Obst, C. G. and P. C. A. D. Andrea B Coulson (2015). "Reflections on natural capital accounting at the national level." Sustainability Accounting, Management and Policy Journal 6(3): 315-339.	This paper aims to increase awareness of work on accounting for natural capital at the national and international level that has been ongoing for many years and has recently culminated in the adoption of international statistical standards for environmental-economic accounting	10.1108/SAMPJ-04-2014-0020	SEEA, WEA	X			X
Ruijs, A., M. Vardon, S. Bass and S. Ahlroth (2019). "Natural capital accounting for better policy." Ambio 48(7): 714-725.	This paper synthesises lessons on the institutional mainstreaming of the SEEA and its use in improving policy decisions affecting natural capital, drawing on discussions held at two Policy Forums organised by the World Bank Wealth Accounting and Valuation of Ecosystem Services program and the United Nations Statistical Division	10.1007/s13280-018-1107-y	SEEA, EFA, BVES	X			X
Whitaker, S. (2018). The Natural Capital Protocol. Debating Nature's Value: 25-38.	The article (in the form of a book chapter) explores the history and need for the Natural Capital Protocol, its structure and development, and some recent criticism of Natural Capital approaches	10.1007/978-3-319-99244-0_4	NCP	X				X
Wilson, J. P. (2021). "Making Information Measurement Meaningful: The United Nations’ Sustainable Development Goals and the Social and Human Capital Protocol." Information 12(8): 338.	This paper describes the development of environmental reporting and corporate social responsibility (CSR), discuss the natural capital protocol, and assess the extent to which the Social and Human Capital Protocol is able to fulfil its purpose of providing SMART objective measurements (as recommended by the Capitals Coalition: Specific, Measurable, Attainable, Relevant, Time-based objectives)	10.3390/info12080338	NCP	X			X
Yu, H., Y. Wang, X. Li, C. Wang, M. Sun and A. Du (2019). "Measuring ecological capital: State of the art, trends, and challenges." Journal of Cleaner Production 219: 833-845.	This study investigates the relationship between the new proposed concept (ecological capital) and the existing two concepts of natural capital and ecosystem services, by examining the research trends of ecological capital accounting publications from 1997 to 2017	10.1016/j.jclepro.2019.02.014	SEEA, LCA, EMA, EFA, BVES, MVES	X		X
List of #22 selected NCA methodological reports from the grey literature
A4S, 2019. Essential guide to natural and social capital accounting – An introduction to integrating Natural and Social Capital into accounting and decision making. The Prince’s Accounting for Sustainability Project (A4S) Chief Financial Officer Leadership Network; 28 p.	This is a practical guide to help finance teams understand the growing movement towards natural and social capital accounting. The guide explains the key terms finance teams should know, how broadening accounting frameworks can benefit business, and the central role of the finance team on collecting, analysing, and reporting this new type of information. The guide also suggests a set of principle…	https://www.accountingforsustainability.org/content/a4s/corporate/en/knowledge-hub/guides/Natural-social-capital.html
Bandel, T., Cortes Sotomayor, M., Kayatz, B., Müller, A., Riemer, O., Wollesen, G., 2020. True Cost Accounting (TCA) Inventory Report. Soil & More Impacts, TMG Thinktank for Sustainability, and Global Alliance for the Future of Food (online); 38 p.	The report includes a review and synthesis of existing frameworks and methodologies used to apply True Cost Accounting (TCA) across food systems, background information on the inventory of databases, and a review of existing studies that can be considered as leading examples or current good practice in the field of TCA applications in the food and agriculture sector. For the synthesis of TCA meth…	https://assets.ctfassets.net/rrirl83ijfda/nqBB7vhvltsYqhCFOym7l/fbd6d61d10a63bf6ca08971d9a682091/TCA-Inventory-Report.pdf
Capitals Coalition, 2020. Draft TEEB for Agriculture and Food – Operational Guidelines for Business. Capitals Coalition (online); 136 p.	Developed to support businesses in implementing the TEEBAgriFood Evaluation Framework, these Guidelines provide a practical way for businesses to understand and act upon their impact and dependency on natural, human, social, and produced capital. The Guidelines reference and build on the internationally accepted harmonized business frameworks for identifying, measuring, and valuing the business r…	https://naturalcapitalcoalition.org/wp-content/uploads/2020/07/DRAFT-TEEBAgriFood-Operational-Guidelines.pdf
CDC Biodiversité, 2021. Global Biodiversity Score – 2021 Update – Establishing an ecosystem of stakeholders to measure the biodiversity performance of human activities. Report N°18 - December 2021; Berger, J., Choukroun, R., Costes, A., Mariette, J., Rouet-Pollakis, S., Vallier, A., Zhang, P.; Mission Économie de la Biodiversite, Paris, France; 56 p.	In 2020, CDC Biodiversité took its part into the transformative change required to protect biodiversity by releasing the Global Biodiversity Score® or GBS 1.0, the first version of its biodiversity footprint assessment tool. After five years of development, road-testing and a scientific review, the GBS tool is now available to companies seeking a leading role in the preservation of biodiversity t…	https://www.mission-economie-biodiversite.com/wp-content/uploads/2022/02/N18-TRAVAUX-DU-CLUB-B4B-GBS-UK-MD-WEB.pdf
Eigenraam, M., McLeod, R., Obst, C., 2019. Integrated Catchment Management Evaluation Framework (ICM-EF): A Multiple-Capital Accounting Approach. Institute for the Development of Environmental-Economic Accounting (IDEEA Group); prepared for Department of Land, Water and Planning (DELWP), Victoria, Australia; 19 p.	The ICM – Evaluation Framework (ICM-EF) presented in this report is modelled on the United Nations System of Environmental-Economic Accounting framework (SEEA 2012) and the TEEB AgriFood Evaluation Framework (2018). The key elements of the ICM-EF are: the Multiple Capital Accounting approach using the accounting guidelines and principles contained in the SEEA; multiple capitals within the core ac…	https://www.ideeagroup.com/wp-content/uploads/DELWP-ICM-Evaluation-Framework-Final-Report-Dec-2019.pdf
Eigenraam, M., McLeod, R., Sharma, K., Obst, C., Jekums, A., 2020. Applying the TEEBAgrifood Evaluation Framework – Overarching Implementation Guidance. Global Alliance for the Future of Food (online); 68 p.	Since the launch of the TEEBAgriFood Scientific and Economics Foundations report in 2018, the TEEBAgriFood Framework has become a foundational reference for true cost accounting in food systems. This is a step-by-step guide to assess how food systems impact people, society, the environment, and natural resources.	https://futureoffood.org/wp-content/uploads/2021/01/GA_TEEBAgriFood_Guidance.pdf
FAO, 2015. Natural Capital Impacts in Agriculture – Supporting Better Business Decision-Making. Food and Agriculture Organization of the United Nations (FAO), Rome, Italy; 118 p.	As part of a collaborative consortium (IUCN, CISL, EY, IERS, Trucost, True Price), FAO was involved in developing the sector guide for food and beverages. The guide supports the Natural Capital Protocol by focusing on natural capital accounting specifically for the food and beverages supply chain including the production of agricultural commodities. FAO and Trucost have conducted an environmental…	https://www.fao.org/fileadmin/templates/nr/sustainability_pathways/docs/2015-11-19_Natural_Capital_Impacts_in_Agriculture-Supporting_Better_Business_Descision-Making_v8.pdf
GRI, 2020. Consolidated set of GRI sustainability reporting standards. Global Reporting Initiative (GRI), Amsterdam, The Netherlands.	The GRI Standards are a modular system of interconnected standards. They allow organizations to publicly report the impacts of their activities in a structured way that is transparent to stakeholders and other interested parties. The GRI Topic Standards contain disclosures for providing information on topics. Examples include Standards on waste, occupational health and safety, and tax. Each Stand…	https://www.globalreporting.org/how-to-use-the-gri-standards/gri-standards-english-language/
ISO, 2019a. ISO 14007:2019 ─ Environmental management — Guidelines for determining environmental costs and benefits. International Organization for Standardization (ISO).	The ISO 14007 document gives guidelines for organizations on determining the environmental costs and benefits associated with their environmental aspects. It addresses the dependencies of an organization on the environment, for example, natural resources, and the context in which the organization operates or is located. Environmental costs and benefits can be expressed quantitatively, in both non…	https://www.iso.org/standard/70139.html
ISO, 2019b. ISO 14008:2019 ─ Monetary valuation of environmental impacts and related environmental aspects. International Organization for Standardization (ISO).	The ISO 14008 document specifies a methodological framework for the monetary valuation of environmental impacts and related environmental aspects. Environmental impacts include impacts on human health, and on the built and natural environment. Environmental aspects include releases and the use of natural resources. The monetary valuation methods in this document can also be used to better underst…	https://www.iso.org/standard/43243.html
La Notte, A., Vallecillo Rodriguez, S., Polce, C., Zulian, G., Maes, J., 2017. Implementing an EU system of accounting for ecosystems and their services – Initial proposals for the implementation of ecosystem services accounts. Report under phase 2 of the knowledge innovation project on an integrated system of natural capital and ecosystem services accounting in the EU; EUR 28681 EN, JRC107150; P…	The Knowledge Innovation Project on an Integrated system of Natural Capital and ecosystem services Accounting (KIP INCA) aims to work in line with the UN System of Environmental-Economic Accounting- Experimental Ecosystem Accounts (SEEA EEA) and also to propose how the approaches to accounting can be further developed based on experience in the EU. The Technical Recommendations of SEEA EEA make p…	https://publications.jrc.ec.europa.eu/repository/handle/JRC107150
Lucas, P., Vardon, M., 2021. Greening the recovery to make it last – The role of natural capital accounting. Policy report, PBL Netherlands Environmental Assessment Agency, The Hague; 49 p.	This report shows government decision-makers how a natural capital approach — and more specifically natural capital accounting (NCA) — can support a greener, more inclusive and more resilient recovery; further referred to as a ‘green recovery’. It was prepared as input to the 5th Policy Forum on Natural Capital Accounting for Better Decision Making of 15–16 September 2021.	https://www.pbl.nl/sites/default/files/downloads/pbl-2021-greening-the-recovery-to-make-it-last-4458.pdf
Natural Capital Coalition, 2016. Natural Capital Protocol. Capitals Coalition (online); 134 p.	All organizations to varying degrees are dependent on the health of the natural world. Organizations also impact on nature’s health, both positively and negatively. The Natural Capital Protocol is a decision-making framework that enables organisations to identify, measure and value their direct and indirect impacts and dependencies on natural capital. Understanding the complex and dynamic relatio…	https://capitalscoalition.org/wp-content/uploads/2021/01/NCC_Protocol.pdf
NCD, 2015. Towards including natural resource risks in cost of capital – State of play and the way forward. Natural Capital Declaration (NCD); United Nations Environment Programme (UNEP) Finance Initiative, Chatelaine, Geneva, Switzerland; 53 p.	This scoping study explores the rationale for the financial industry to map and integrate natural capital risk into credit risk management and assesses the current state of global knowledge to inform the project’s implementation. Part 1 provides a business case for both banks and asset managers to incorporate natural capital factors in their lending and investment decision-making processes. It re…	https://www.unepfi.org/fileadmin/documents/NCD-NaturalResourceRisksScopingStudy.pdf
OECD, 2021. Biodiversity, Natural Capital and the Economy – A Policy Guide for Finance, Economic and Environment Ministers. Environment Policy Paper No. 26; Organisation for Economic Co-operation and Development (OECD) Environment Directorate, Paris, France; 81 p.	This report, prepared by the OECD as an input to the UK’s G7 Presidency in 2021, provides policy guidance for Finance, Economic and Environment Ministries to underpin transformative domestic and international action to halt and reverse biodiversity loss. The analysis focuses on four priority action areas for governments. Among others, the report recommends to develop and use of comprehensive natu…	https://www.oecd-ilibrary.org/docserver/1a1ae114-en.pdf?expires=1671027650&id=id&accname=guest&checksum=5288CC047B543898643F8F4D638FBFFA
PwC, 2015. Valuing corporate environmental impacts – PwC methodology document. PwC United Kingdom; 64 p.	This methodological report is based on the Natural Capital Protocol. Working in a consortium led by the World Business Council for Sustainable Development, PwC contributed with its methodologies, provided technical insights for inclusion in the protocol, and developed content.	https://www.pwc.co.uk/sustainability-climate-change/assets/pdf/pwc-environmental-valuation-methodologies.pdf
TEEB, 2018. TEEB for Agriculture & Food: Scientific and Economic Foundations. The Economics of Ecosystems and Biodiversity (TEEB), United Nations Environment Programme, Geneva, Switzerland; 399 p.	The TEEBAgriFood ‘Scientific and Economic Foundations’ report addresses the core theoretical issues and controversies underpinning the evaluation of the nexus between the agri-food sector, biodiversity and ecosystem services and externalities including human health impacts from agriculture on a global scale. It argues the need for a 'systems thinking' approach, draws out issues related to health,…	https://teebweb.org/wp-content/uploads/2018/11/Foundations_Report_Final_October.pdf
The World Bank, 2019. Natural Asset and Biodiversity Valuation in Cities. Technical Paper; International Bank for Reconstruction and Development / The World Bank, Washington DC, USA; 64 p.	Cities are increasingly recognizing the role of the natural environment in shaping healthy and livable places that enhance human capital. Cities are beginning to use natural capital accounting as a tool to assess and monitor the quality of their environment and to inform effective policy making. This paper reviews some of these leading approaches and draws out lessons for other cities. In particu…	https://documents1.worldbank.org/curated/en/287521568801462241/pdf/Technical-Paper.pdf
TRUCOST, 2015. Trucost’s Valuation Methodology. In: GaBi LCIA Documentation; Sphera Solutions GmbH, Leinfelden-Echterdingen, Germany; 67 p.	Trucost’s NCA valuation methodology monetizes traditional lifecycle assessment (LCA) impacts to help optimize product sustainability along the entire life cycle. The methodology is enhancing traditional LCA impacts with natural capital valuations. For example, Trucost quantifies the cost of ozone generating substances to health, crops, and ecosystems, quantifies the cost of water use, and quantif…	https://gabi.sphera.com/support/gabi/gabi-lcia-documentation/trucost-natural-capital-accounting-global-coefficients/
Vardon, M., Bass, S., Ahlroth, S., Ruijs, A., 2017. Forum on Natural Capital Accounting for Better Policy Decisions – Taking Stock and Moving Forward. Wealth Accounting and the Valuation of Ecosystem Services (WAVES) and World Bank Group, Washington, DC, USA; 249 p.	The Netherlands Ministry of Foreign Affairs and the World Bank–led WAVES Global Partnership share an ambition to improve the uptake, use, and effectiveness of NCA. Based on the successful lesson sharing at the first NCA forum, “Natural Capital Accounting for Better Policy,” organized by both parties in The Hague on November 22–23, 2016, this publication presents a rich and diverse set of case stu…	https://documents1.worldbank.org/curated/en/904211580129561872/pdf/Forum-on-Natural-Capital-Accounting-for-Better-Policy-Decisions-Taking-Stock-and-Moving-Forward.pdf
VBA, 2021. Methodology Impact Statement General Paper – Version 0.1. Consultation Draft, Value Balancing Alliance (VBA), Frankfurt am Main, Germany; 45 p.	As a group of global companies aiming to integrate social and environmental aspects in decision making, steering and performance evaluation, the VBA has developed a first version of a methodology for impact valuation. This first version has been piloted by the VBA member companies to check the feasibility and gain practical experience and learnings. The VBA methodology consists of three papers th…	https://www.value-balancing.com/_Resources/Persistent/2/6/e/6/26e6d344f3bfa26825244ccfa4a9743f8299e7cf/20210210_VBA%20Impact%20Statement_GeneralPaper.pdf
Vionnet, S., Blower, L., Klages, S., Heller, C., Santamaría, M., Gough, M., Abela, M., Verheye, T., Mueller, L., 2021. Corporate natural capital accounting – Understanding challenges and pursuing standardization opportunities. Report of the EU Life project “TRANSPARENT” (Standardized Principles for Natural Capital Accounting); World Business Council for Sustainable Development (WBCSD), Value Bala…	This report provides an overview of corporate natural capital accounting resources and applications, identifying best practices, challenges and standardization opportunities. It provides clear recommendations on the way ahead highlighting the need to focus on: impact pathway definition, valuation techniques and factors, accounting rules, Input-Output and Life Cycle Assessment alignment, decision-…	https://capitalscoalition.org/wp-content/uploads/2021/04/Transparent-benchmarking-final.pdf

## Sheet: Table S1.3
Table S1.3 Evaluation of criteria across methods and tools for conducting NCA analyses
List of acronyms: NC = natural capital NCA = natural capital accounting ES = ecosystem service(s) GIS = geographic information system CICES = common international classification of ecosystem services GDP = gross domestic product	Natural Capital Protocol	System of Environmental-Economic Accounting	Life Cycle Assessment-based methods	EMergy Analysis	Ecological Footprint Accounting	Expert-based Qualitative Accounting	Biophysical Valuation of Ecosystem Services	Monetary Valuation of Ecosystem Services	Wealth Accounting
[NCA method's acronym]:	[NCP]	[SEEA]	[LCA]	[EMA]	[EFA]	[EQA]	[BVES]	[MVES]	[WEA]
Criteria:
Objectives and scope	Framework designed to help generate trusted, credible, and actionable information for business managers to inform decisions. It aims to support better decisions by including how we interact with nature or more specifically natural capital.	Framework to organize and present statistics on the environment and its relationship with the economy, bringing together economic and environmental information in an internationally agreed set of standard concepts, definitions, classifications, accounting rules and tables to produce comparable statistics.	Inventory and assessment tools to account for environmental flows (stressors such as resource extractions or pollutant releases) and the associated environmental impacts along anthropic production systems, such as products life cycles, companies and nations territories, covering multiple categories of impact and allowing to support decisions on environmental management ideally at all stages and l…	Framework to account for the total amount of energy of one type (most often solar energy) used up in the work processes that either generate single goods and services, or create territorial socioeconomic systems encompassing multiple functions, such as a city or a country.	Resource accounting tool that measures the amount of the Earth׳s regenerative capacity (or “biocapacity”) demanded by a given activity, or the ecological assets that a given population or product requires to produce the natural resources it consumes, and to absorb its waste.	Any qualitative natural capital valuation measures based on experience and perceptions data, built using participatory modelling, expert-based qualitative surveys or any other type of citizens science-based approach.	Set of tools (modelling and data analysis and accounting frameworks) able to calculate the physical cost (e.g., in time, energy, mass, area, etc.) and the levels of pressure of human activities on ecosystems, then allowing to assess changes and dipendences on the ecosystem service supply.	Set of market and non-market valuation techniques applied to pricing ecosystem services and/or calculate the costs and benefits (in monetary units) associated with the use activites of natural capital and the associated provision of ecosystem services.	Balance sheet for a country that is able to capture the value of all the assets that generate income and support human well-being, going beyond GDP in order to indicate the value of the underlying national assets and therefore the prospects for maintaining and increasing the GDP income over the long term.
Typology and data sources	Statistics / In-situ sources / Literature / Inventory Datasets	Statistics / In-situ sources / Literature / Remote sensing / Spatial analysis datasets	Statistics / In-situ sources / Literature / Inventory Datasets	Statistics / In-situ sources / Literature / Inventory Datasets / Remote sensing / Spatial analysis datasets	Statistics / In-situ sources / Literature / Inventory Datasets Remote sensing / Spatial analysis datasets	Statistics / Literature / Expert-based and qualitative inputs	Statistics / In-situ sources / Literature / Remote sensing / Spatial analysis datasets	Statistics / Literature / Expert-based and qualitative inputs	Statistics / Literature
Spatial scale	From local (business area) to national (supply-chain dimension)	From regional to national economies	From micro / product scale to territorial / organisational scale and national (input-output)	From product to global scale	From product to global scale	From local to regional scale	From local (1x1m pixel resolution) to global scale	From product to global economy scale	From regional to global scale
Temporal scale	Yearly	From daily to yearly	From daily to yearly	From hourly to yearly	Yearly	Yearly	From hourly to yearly	Yearly	Yearly
Case studies/pilots	Quite numerous in the grey literature, but almost absent in the scientific literature	Numerous in both scientific and grey literature	Fairly scarse in both scientific and grey literature	Quite numerous in the scientific literature, but almost absent in the grey literature	Quite numerous both in the scientific and grey literature, but mostly targeting nationally relevant scales	Quite numerous in the scientific literature; apparently scarcer in the grey literature	Numerous in the scientific literature; apparently scarcer in the grey literature	Quite numerous in the scientific literature; apparently scarcer in the grey literature	Quite numerous in the grey literature, but almost absent in the scientific literature
Models and tools	No limits in the use of models and tools for NCA: flexible framework	Recommended use of spatially-explicit models and tools for NC accounts	Ideally flexible scope for the use of models and tools able to capturing NC information/data/related impacts, but methodological limitations exist	Ideally flexible scope for the use of models and tools able to capturing NC information/data/related impacts, but methodological limitations exist	Very limited use of models and tools able to capturing NC information/data/related impacts; quite strict methodological framework	Widespread use of different citizens science and participatory methods to gather expert-based inputs and advice	No limits in the use of models and tools: numerous modelling frameworks and sophisticated tools exist to capture spatially-explicit information on NC	No limits in the use of models and tools: numerous monetary-based techniques exist to combine market and non-market valuations of NC	Data typically rely on large scale (nationally referenced) non-market economic valuations of NC assets, such as specific ES and/or natural resources
Impact categories and methods	Environmental impact categories (with indicators as typically used in LCA) and ES assessment methods and indicators (e.g., CICES-based) are usually used (as recommended in the methodological guidelines)	Environmental impact categories (with indicators as typically used in LCA) and ES assessment methods and indicators (e.g., CICES-based) are usually used (as recommended in the methodological guidelines)	Environmental impact category indicators are usually applied for natural resource accounting, and in some (more advanced) cases ES assessment methods and indicators are also used in combination with, or provided as an output by, ES modelling approaches	emergy-based indicators are typically implemented (several ratios among renewable and non-renewable, imported or locally-produced, emergy flows) as well as GIS-based mapping is often used to enhance the spatial distribution and location of emergy-based ES and resource flows	Yield and equivalence factors are used to convert productive lands into EFA metrics (global hectares); GIS tools or remote sensing in some (more advanced) cases can be used to account for those yield and equivalence factors in order to refine their representativeness for high-quality local scale biocapacity assessments	Data collection through questionnaires and surveys are the most used approaches in EQA-based NCA	Mainly GIS- and land cover (change)-based indicators and methods for ES assessment are applied; other types of in-situ assessment and monitoring methods (e.g. species observations) can also be applied to improve the NC accounting for local scale assessments	Methods of benefits transfer and other non-market valuation techniques (Revealed Preference and Stated Preference methods) are widely acknowledged in the ES literature and applied in NCA	Socioeconomic valuation indicators, as well as environmental indicators, which can capture NC related aspects (ES, externalities, assets, etc.), are estimated in monetary units (in order to enhance comparability with GDP or similar indices) and included in regional/national scale accounts
Sources of uncertainty	Uncertainty is mainly related to the quality of data and modelling operations used to compute ES values	Uncertainty is mainly related to the quality of data and modelling operations used to compute ES values	Uncertainty is mainly related to the quality of data and modelling operations used to compute ES values	Uncertainty is mainly related to the quality of data and modelling operations used to compute ES values, which in emergy may often result into low quality outputs	Uncertainty is mainly related to the quality of data used to compute the yield and equivalence factors to perform the EFA	Uncertainty is mainly due to subjective choice and possible individual value judgements	Uncertainty is mainly associated with the use of modelling tools for capturing ecosystem datra and perform ES calculation	Uncertainty sources are intrinsic to the methodologies and techniques applied for monetary-based valuation and the conversion from biophysical to economic accounts (when this applies)	Uncertainty is associated with the statistical data frames where information is collected to perform the NCA

## Sheet: Table S1.4
	Table S1.4 Analysis and mapping of the literature intersecting NCA and LCA	VALUE	LIKERT-TYPE SCALING ASSUMPTIONS				RELEVANCE
		1 =	No info is usually provided about the target audience (e.g., on public or private economic sectors, or networks of individuals , communities, etc.)	No engagement with stakeholders needed/declared	No consideration of the beneficial impacts associated with the use of natural capital	There is no overlap between the LCA-based approach and the NCA rationale (e.g., resource consumption indicators do not explicitly consider NC aspects)	low
		2 =	Only one sector or network can be explicitly targeted in the study	Indirect stakeholder engagement (e.g., use of data collected in previous participatory sessions out of the study; data collected from the company analysed in the study; ...)	Benefits associated with the use of natural capital are only qualitatively discussed	At least one methodological aspect is observed/highlighted that is common among the LCA-based approach and the NCA rationale	medium
		3 =	More than one sector or network can be explicitly targeted in the study	Direct stakeholder engagement in data collection and/or method application and/or results interpretation and feedback	An explicit and/or quantitative accounting is performed focusing on the benefits associated with the NC dependency	Complementary features among the LCA-based approach and the NCA rationale are explicitly considered/discussed	high
	NCA methods with life cycle thinking		Target audience	Stakeholder engagement	Consideration of natural capital benefits (in addition to NC impacts)	Overlap and complementary features
	Life Cycle Assessment-based methods	LCA	3	2	1	2	8
	EMergy Analysis	EMA	2	2	3	3	10
	Ecological Footprint Accounting	EFA	1	1	2	2	6	Least relevant
	Natural Capital Protocol	NCP	2	3	3	3	11	Most relevant

## Sheet: Table S1.5
Table S1.5 Analysis and mapping of the literature intersecting NCA and LCA													Examples								Potential alignment of the ES class to one or more LCA elements, among which: intermediate or final activity system; inventory system; impact assessment indicator, and area of protection
	CICES V5.1	2018-01-01																			Alignment with product systems (i.e., the ES class has a taxonomic structure analogous to the one of a product-system with functional unit typically modelled in LCA)		Alignment with LCI (i.e., the ES class is possibly compatible with the classification system for natural resource elementary flows typically used in LCI, such as the one of the ecoinvent database)	EXERCISE OF ES-LCI ALIGNMENT WITH ECOINVENT v3.8 (ELEMENTARY EXCHANGES)									Alignment with LCIA, part 1 (i.e., a specific life cycle impact category indicator and/or model can be used and/or adapted to account for changes, or assess impacts on, the ES supply)		Alignment with LCIA, part 2 (i.e., the ES class belongs to an 'area of protection' that can be acknowledged in LCA, and used to give qualitative value judgements or quantitative weights of protection priority)
Filter	Section	Division	Group	Class	Class type	Simple descriptor	Ecological clause	Use clause	Example Service	Example Goods and Benefits	Literature examples for individual services	Literature examples for multiple ecosystem services	Code	Marine CICES (Relevance)	V4.3 Equivalent	Code(4.3)	IPBES Code	IPBES Name	MA	TEEB		Example(s) of product-system		Name	Compartment	Subcompartment	Unit Name	CAS Number	Comment	Synonym	Formula	Comment on alignment		Example of impact category		Example of area of protection
CICES	Provisioning (Biotic)	Biomass	Cultivated terrestrial plants for nutrition, materials or energy	Cultivated terrestrial plants (including fungi, algae) grown for nutritional purposes	Crops by amount, type (e.g. cereals, root crops, soft fruit, etc.)	Any crops and fruits grown by humans for food; food crops	The ecological contribution to the growth of cultivated, land-based crops…..	…that can be harvested and used as raw material for the production of food	Standing wheat crop before harvest (Proxy for: ecosystem contribution to growth of harvestable wheat)	Harvested crop; Grain in farmer's store; flour, bread		Maes et al., 2016, Mapping and Assessment of Ecosystems and their Services: This report assesses a variety of ecosystem services across the different sections, such as crop production, water provision, air quality regulation and recreation. https://www.researchgate.net/profile/Joachim_Maes2/publication/274256807_Mapping_and_Assessment_of_Ecosystems_and_their_Services_Trends_in_ecosystems_and_ecos…	1.1.1.1	0	Cultivated crops	1.1.1.1	12	Food and feed	Food	Food	√	1 kg of wheat; 1 kg of fresh fruit; 1 kg of mushrooms; …
CICES	Provisioning (Biotic)	Biomass	Cultivated terrestrial plants for nutrition, materials or energy	Fibres and other materials from cultivated plants, fungi, algae and bacteria for direct use or processing (excluding genetic materials)	Material by amount, type, use, media (land, soil, freshwater, marine)	Material from plants, fungi, algae or bacterial that we can use	The ecological contribution to the production of plants, fungi, algae or bacterial…	…that can be harvested and used as raw material for non-nutritional purposes	Harvestable surplus of annual tree growth	Processed timber (Volume of harvested wood)		forest provisioning services: Kalaba et al., 2013, Contribution of forest provisioning ecosystem services to rural livelihoods in the Mimbo woodlands of Zambia. http://link.springer.com/article/10.1007/s11111-013-0189-5	1.1.1.2	0	Fibres and other materials from plants, algae and animals for direct use or processing	1.2.1.1	13, 14	Materials and assistance, Medicinal, biochemical and genetic resources	Fibre, Timber, Ornamental, Biochemical	Raw materials, medicinal resources	√	1 kg of cork; 1 m3 of timber; …	(√)									Ideally any resource flow from extensive agri-forestry/agri-food production systems with negligible human intervention
													1.1.1.2										(√)	Wood, hard, standing	natural resource	biotic	m3
													1.1.1.2										(√)	Wood, soft, standing	natural resource	biotic	m3
													1.1.1.2										(√)	Wood, unspecified, standing	natural resource	biotic	m3					to be checked how the flow is used in ecoinvent (possibly not used in agri-forestry systems)
CICES	Provisioning (Biotic)	Biomass	Cultivated terrestrial plants for nutrition, materials or energy	Cultivated plants (including fungi, algae) grown as a source of energy	By amount, type, source	Plant materials used as a source of energy	The ecological contribution to the growth of cultivated crops…..	…that can be harvested and used as a source of biomass-based energy	Standing crop of Miscanthus at time of harvest	Energy production			1.1.1.3	0	Plant-based resources	1.3.1.1	11	Energy	Fibre, Timber, Ornamental, Biochemical	Raw materials, medicinal resources	√	1 m3 of wood, or 1 MJ of energy, from short rotation coppice; …	(√)									Ideally any resource flow from extensive agri-forestry/agri-food production systems with negligible human intervention, or for which an allocation factor to exclude the human contribution is applied in the case of a co-production system
																								Energy, gross calorific value, in biomass	natural resource	biotic	MJ
													1.1.1.3											Energy, gross calorific value, in biomass, primary forest	natural resource	biotic	MJ					Probably not pertinent, as primary forest (especially if considered virgin forest) is actually wild and not cultivated…
													1.1.1.3											Wood, hard, standing	natural resource	biotic	m3
													1.1.1.3											Wood, soft, standing	natural resource	biotic	m3
													1.1.1.3											Wood, unspecified, standing	natural resource	biotic	m3
CICES	Provisioning (Biotic)	Biomass	Cultivated aquatic plants for nutrition, materials or energy	Plants cultivated by in- situ aquaculture grown for nutritional purposes	Plants, algae by amount, type	Plants that are cultivated in fresh or salt water that we eat	The ecological contribution to the growth of plants and algae under aquaculture….	…that can be harvested and used as raw material for the production of food	Harvestable surplus of seaweed biomass in situ	Vitamin supplement			1.1.2.1	1	Plants and algae from in-situ aquaculture	1.1.1.5	12	Food and feed	Food	Food	√	1 kg of of cultivated seaweed for nutritional purposes; …
CICES	Provisioning (Biotic)	Biomass	Cultivated aquatic plants for nutrition, materials or energy	Fibres and other materials from in-situ aquaculture for direct use or processing (excluding genetic materials)	Plants, algae by amount, type	Plants that are cultivated in fresh or salt water that we can use as a material	The ecological contribution to the growth of plants and algae under aquaculture….	…that can be harvested and used as raw material for non-nutritional purposes	Harvestable surplus of seaweed biomass in situ	Seaweed as an insulating material			1.1.2.2	1	Plants and algae from in-situ aquaculture	1.1.1.5	13, 14	Materials and assistance, Medicinal, biochemical and genetic resources	Fibre, Timber, Ornamental, Biochemical	Raw materials, medicinal resources	√	1 kg of of cultivated seaweed for construction purposes; …	(√)									Ideally any resource flow from extensive aquaculture systems with negligible human intervention
CICES	Provisioning (Biotic)	Biomass	Cultivated aquatic plants for nutrition, materials or energy	Plants cultivated by in- situ aquaculture grown as an energy source	Plants, algae by amount, type	Plants that are cultivated in fresh or salt water that we can use as an energy source	The ecological contribution to the growth of plants and algae under aquaculture….	…that can be harvested and used as a source of energy	Harvestable surplus of seaweed biomass in situ	Seaweed as a source of energy			1.1.2.3	1	Plants and algae from in-situ aquaculture	1.1.1.5	11	Energy	Fibre, Timber, Ornamental, Biochemical	Raw materials, medicinal resources	√	1 kg of of cultivated seaweed for energy production purposes; …	(√)									Ideally any resource flow from extensive aquaculture systems with negligible human intervention, or for which an allocation factor to exclude the human contribution is applied in the case of a co-production system
																					√			Energy, gross calorific value, in biomass	natural resource	biotic	MJ
CICES	Provisioning (Biotic)	Biomass	Reared animals for nutrition, materials or energy	Animals reared for nutritional purposes	Animals, products by amount, type (e.g. beef, dairy)	Livestock raised in housing and/or grazed outdoors	The ecological contribution to the rearing of domesticated land-based animals and their outputs…	…that can be used as raw material for the production of food	Increase in weight or numbers of cattle herd per year [previously the grass feeding these animals was considered the final service ]	Meat produced at abattoir, eggs, milk sold on farm or in shops			1.1.3.1	0	Reared animals and their outputs	1.1.1.2	12	Food and feed	Food	Food	√	1 kg of animal product for nutrinional purposes	(√)									Ideally any resource flow from extensive livestock production systems with negligible human intervention (e.g., wild pigs reared in woodland)
CICES	Provisioning (Biotic)	Biomass	Reared animals for nutrition, materials or energy	Fibres and other materials from reared animals for direct use or processing (excluding genetic materials)	Material by amount, type, use, media (land, soil, freshwater, marine)	Material from animals that we can use	The ecological contribution to the production of animal matter…	…that can be harvested and used as raw material for non-nutritional purposes	Harvestable number and quality of animal skins in herd	Hide products			1.1.3.2	0	Materials from plants, algae and animals for agricultural use	1.2.1.2	13, 14	Materials and assistance, Medicinal, biochemical and genetic resources	Fibre, Timber, Ornamental, Biochemical	Raw materials, medicinal resources	√	1 kg of raw material from animal rearing, for leather production; …	(√)									Ideally any resource flow from extensive livestock production systems with negligible human intervention
CICES	Provisioning (Biotic)	Biomass	Reared animals for nutrition, materials or energy	Animals reared to provide energy (including mechanical)	By amount, type, source	Animal materials used as a source of energy or for traction	The ecological contribution to domesticated or wild animal species whose outputs…	…that can provide a source of energy	Volume of dung or number of animals used for traction	Cooking fuel or Haulage	Energy from manure: Yirode et al., 2009, Nonmarket co-benefits and economic feasibility of on-farm biogas energy production. Energy policy, 37(3), pp.1170-1179.	Energy from manure: Yirode et al., 2009, Nonmarket co-benefits and economic feasibility of on-farm biogas energy production	1.1.3.3	0	Animal-based resources & Animal-based mechanical energy	1.3.1.2 & 1.3.2.1	11	Energy	Fibre, Timber, Ornamental, Biochemical	Raw materials, medicinal resources	√	1 kg of animal waste, used for energy production purposes; …	(√)									Ideally any resource flow from extensive livestock production systems with negligible human intervention, or for which an allocation factor to exclude the human contribution is applied in the case of a co-production system
													1.1.3.3											Energy, gross calorific value, in biomass	natural resource	biotic	MJ
CICES	Provisioning (Biotic)	Biomass	Reared aquatic animals for nutrition, materials or energy	Animals reared by in-situ aquaculture for nutritional purposes	Animals by amount, type	Animals that are cultivated in fresh or salt water that we eat.	The ecological contribution to the growth of cultivated aquatic animals ….	…that can be used as raw material for the production of food	Harvestable stock of bivalves	Seafood (e.g. mussels)			1.1.4.1	1	Animals from in-situ aquaculture	1.1.1.6	12	Food and feed	Food	Food	√	1 kg of fish from rearing plants, for nutritional purposes; …	(√)									Ideally any resource flow from extensive aquaculture systems with negligible human intervention, or for which an allocation factor to exclude the human contribution is applied in the case of a co-production system
CICES	Provisioning (Biotic)	Biomass	Reared aquatic animals for nutrition, materials or energy	Fibres and other materials from animals grown by in-situ aquaculture for direct use or processing (excluding genetic materials)	Animals by amount, type	Animals that are cultivated in fresh or salt water that we can use as a material.	The ecological contribution to the growth of cultivated aquatic animals ….	…that can be harvested and used as raw material for non-nutritional purposes	Harvestable pearls produced by oyster beds	Pearls used for adornment			1.1.4.2	1	Animals from in-situ aquaculture	1.1.1.6	13, 14	Materials and assistance, Medicinal, biochemical and genetic resources	Fibre, Timber, Ornamental, Biochemical	Raw materials, medicinal resources	√	1 kg of fish from rearing plants, for non-nutritional purposes; …	(√)									Ideally any resource flow from extensive aquaculture systems with negligible human intervention, or for which an allocation factor to exclude the human contribution is applied in the case of a co-production system
CICES	Provisioning (Biotic)	Biomass	Reared aquatic animals for nutrition, materials or energy	Animals reared by in-situ aquaculture as an energy source	Animals by amount, type	Animals that are cultivated in fresh or salt water that we can use as a source of energy.	The ecological contribution to the growth of cultivated aquatic animals ….	…that can provide a source of energy	Biogas from aquaculture waste	Energy production			1.1.4.3	1	Animals from in-situ aquaculture	1.1.1.6	11	Energy	Fibre, Timber, Ornamental, Biochemical	Raw materials, medicinal resources	√	1 MJ of energy from aquatic animal biomass; …	(√)									Ideally any resource flow from extensive aquaculture systems with negligible human intervention, or for which an allocation factor to exclude the human contribution is applied in the case of a co-production system
CICES	Provisioning (Biotic)	Biomass	Wild plants (terrestrial and aquatic) for nutrition, materials or energy	Wild plants (terrestrial and aquatic, including fungi, algae) used for nutrition	Plants, algae by amount, type	Food from wild plants	Parts of the standing biomass of a non-cultivated plant species…	…that can be harvested and used for the production of food	Harvestable volume of wild berries or wild mushrooms, Or Benthic macroalgae (e.g. Dulse, Laminaria (Kelp)) and macrophytes (e.g. Salicornia and other saltmarsh plants) harvested in the shallow sublittoral and/or littoral zone	Berries as food or for the production of jam	Wild food in Europe as an ecosystem survive, both food from wild plants and animals. Schulp et al., 2014, Wild food in Europe: A synthesis of knowledge and data of terrestrial wild food as an ecosystem service. http://www.sciencedirect.com/science/article/pii/S0921800914001980		1.1.5.1	1	Wild plants, algae and their outputs	1.1.1.3	12	Food and feed	Food	Food			√	(no ecoinvent flow currently exists to represent this ES class)								Amount of wild plants (terrestrial and aquatic, including fungi, algae) that can be used for nutrition
CICES	Provisioning (Biotic)	Biomass	Wild plants (terrestrial and aquatic) for nutrition, materials or energy	Fibres and other materials from wild plants for direct use or processing (excluding genetic materials)	Plants, algae by amount, type	Materials from wild plants	Parts of the standing biomass of a non-cultivated plant species…	…that can be harvested and used as raw material for non-nutritional purposes	Harvestable volume of reeds Or Macroalgae used for thickening agents, agar and superconductor electrodes	Roofing material			1.1.5.2	1	Wild plants, algae and their outputs	1.1.1.3	13, 14	Materials and assistance, Medicinal, biochemical and genetic resources	Fibre, Timber, Ornamental, Biochemical	Raw materials, medicinal resources			√
													1.1.5.2											Wood, primary forest, standing	natural resource	biotic	m3
													1.1.5.2											Wood, hard, standing	natural resource	biotic	m3
													1.1.5.2											Wood, soft, standing	natural resource	biotic	m3
													1.1.5.2											Wood, unspecified, standing	natural resource	biotic	m3
													1.1.5.2											Peat, in ground	natural resource	biotic	kg
CICES	Provisioning (Biotic)	Biomass	Wild plants (terrestrial and aquatic) for nutrition, materials or energy	Wild plants (terrestrial and aquatic, including fungi, algae) used as a source of energy	Material by type/source	Materials from wild plants, fungi and algae used for energy	Parts of the standing biomass of a non-cultivated plant, fungi, algae or bacteria species…	…that can be harvested and used as and energy source	Volume of harvested wood	Fuel wood	Makungwa et al., 2013, Fuelwood Supply: A Missed Essential Component in a Food Security Equation. http://pubs.sciepub.com/jfs/1/2/6/index.html		1.1.5.3	1	Not recognised in V4.3	N/A	11	Energy	Fibre, Timber, Ornamental, Biochemical	Raw materials, medicinal resources			√
																								Energy, gross calorific value, in biomass	natural resource	biotic	MJ					Probably not pertinent, as the flow is usually considered in agricultural products…
													1.1.5.3											Energy, gross calorific value, in biomass, primary forest	natural resource	biotic	MJ
													1.1.5.3											Peat, in ground	natural resource	biotic	kg
													1.1.5.3											Wood, primary forest, standing	natural resource	biotic	m3
													1.1.5.3											Wood, hard, standing	natural resource	biotic	m3
													1.1.5.3											Wood, soft, standing	natural resource	biotic	m3
													1.1.5.3											Wood, unspecified, standing	natural resource	biotic	m3
CICES	Provisioning (Biotic)	Biomass	Wild animals (terrestrial and aquatic) for nutrition, materials or energy	Wild animals (terrestrial and aquatic) used for nutritional purposes	Animals by amount, type	Food from wild animals	Non-domesticated, wild animal species and their outputs…	…that can be used as raw material for the production of food	Harvestable surplus of cod population, or deer population	Cod liver oil, Venison joint	Deer populations: Knoche and Lupi, 2007, Valuing deer hunting ecosystem services from farm landscapes. http://www.sciencedirect.com/science/article/pii/S0921800907004168		1.1.6.1	1	Wild animals and their outputs	1.1.1.4	12	Food and feed	Food	Food			√
													1.1.6.1											Fish, pelagic, in ocean	natural resource	biotic	kg		Pelagic fish in ocean, resource extracted by fisheries
													1.1.6.1											Fish, demersal, in ocean	natural resource	biotic	kg		Demersal fish in ocean, resource extracted by fisheries
CICES	Provisioning (Biotic)	Biomass	Wild animals (terrestrial and aquatic) for nutrition, materials or energy	Fibres and other materials from wild animals for direct use or processing (excluding genetic materials)	Material by type/source	Materials from wild animals	Materials from wild animals….	…that can be harvested and used as raw material for non-nutritional uses	Reindeer skins Or Zooplankton – jellyfish used to produce collagen for various purposes	Hide products			1.1.6.2	1	Not recognised in V4.3	N/A	13, 14	Materials and assistance, Medicinal, biochemical and genetic resources	Fibre, Timber, Ornamental, Biochemical	Raw materials, medicinal resources			√	(no ecoinvent flow currently exists to represent this ES class)								Amount of fibres and other materials from wild animals
CICES	Provisioning (Biotic)	Biomass	Wild animals (terrestrial and aquatic) for nutrition, materials or energy	Wild animals (terrestrial and aquatic) used as a source of energy	By amount, type, source	Material from wild animals that can be used as a source of energy	Biomass from wild animals….	…that can be used as a source of energy	Seal blubber used by traditional cultures in lamps Or Sand eels (Historical) or Cetaceans	Fuel source			1.1.6.3	1	Not recognised in V4.3	N/A	11	Energy	Fibre, Timber, Ornamental, Biochemical	Raw materials, medicinal resources			√
																								Energy, gross calorific value, in biomass	natural resource	biotic	MJ
CICES	Provisioning (Biotic)	Genetic material from all biota (including seed, spore or gamete production)	Genetic material from plants, algae or fungi	Seeds, spores and other plant materials collected for maintaining or establishing a population	By species or varieties	Seed collection	Seeds and spores and other plant materials…	…that can be used to maintain or establish a new population	Seeds or spores that we can harvest	Wild plant seed for commercial sale			1.2.1.1	1	Not recognised in V4.3	N/A	1, 13, 14	Habitat creation and maintenance, Materials and assistance, Medicinal, biochemical and genetic resources	Genetic materials	Genetic materials			√	(no ecoinvent flow currently exists to represent this ES class)								Amount of seeds, spores and other plant materials that can be collected for maintaining or establishing a population
CICES	Provisioning (Biotic)	Genetic material from all biota (including seed, spore or gamete production)	Genetic material from plants, algae or fungi	Higher and lower plants (whole organisms) used to breed new strains or varieties	By species or varieties	Plants. fungi or algae that we can use for breeding	Wild plants, fungi algae and bacteria …	…that can be used to maintain populations or develop new varieties	Population of plant algae or fungi species used to in breeding programmes	Plant, algae or fungi species with novel characteristics that increase yields or reduce costs by resisting diseases or pests	Ford-Lloyd, B.V., Schmidt, M., Armstrong, S.J., Barazani, O., Engels, J., Hadas, R., Hammer, K., Kell, S.P., Kang, D., Khoshbakht, K. and Li, Y., 2011. Crop wild relatives—undervalued, underutilized and under threat?. BioScience, 61(7), pp.559-565.		1.2.1.2	1	Genetic materials from all biota	1.2.1.3	14	Medicinal, biochemical and genetic resources	Genetic materials	Genetic materials			√	(no ecoinvent flow currently exists to represent this ES class)								Amount of higher and lower plants (whole organisms) that can be used to breed new strains or varieties
CICES	Provisioning (Biotic)	Genetic material from all biota (including seed, spore or gamete production)	Genetic material from plants, algae or fungi	Individual genes extracted from higher and lower plants for the design and construction of new biological entities	Material by type	Genetic material from wild plants. fungi or algae that we can use	Generic information or material from plants, fungi algae and bacteria …	…that can be used in gene synthesis	Harvestable share of population of plant species used to extract genes	Creation of artificial gene products			1.2.1.3	1	Genetic materials from all biota	1.2.1.3	14	Medicinal, biochemical and genetic resources	Genetic materials	Genetic materials			√	(no ecoinvent flow currently exists to represent this ES class)								Amount of individual genes that can be extracted from higher and lower plants for the design and construction of new biological entities
CICES	Provisioning (Biotic)	Genetic material from all biota (including seed, spore or gamete production)	Genetic material from animals	Animal material collected for the purposes of maintaining or establishing a population	By species or varieties	Animals used for replenishing stock		…that can be used to maintain or establish a new population	Spat for fish and shellfish farms	Reduced costs of production			1.2.2.1	1	Not recognised in V4.3	N/A	1, 13, 14	Habitat creation and maintenance, Materials and assistance, Medicinal, biochemical and genetic resources	Genetic materials	Genetic materials			√	(no ecoinvent flow currently exists to represent this ES class)								Amount of animal material that can be collected for the purposes of maintaining or establishing a population
CICES	Provisioning (Biotic)	Genetic material from all biota (including seed, spore or gamete production)	Genetic material from animals	Wild animals (whole organisms) used to breed new strains or varieties	By species or varieties	Wild animals that we can use for breeding	Wild animals …	…that can be used to maintain populations or develop new varieties	Population of animals used in breeding programmes	Animals with novel characteristics that increase yields or reduce costs by resisting diseases or pests			1.2.2.2	1	Genetic materials from all biota	1.2.1.3	14	Medicinal, biochemical and genetic resources	Genetic materials	Genetic materials			√	(no ecoinvent flow currently exists to represent this ES class)								Amount of wild animals (whole organisms) that can be used to breed new strains or varieties
CICES	Provisioning (Biotic)	Genetic material from all biota (including seed, spore or gamete production)	Genetic material from organisms	Individual genes extracted from organisms for the design and construction of new biological entities	Material by type	The genetic information that is stored in wild animals that we can use	Generic material from animals …	…that can be used in gene synthesis	Harvestable share of population of a given species used to extract genes	Creation of a novel micro-organism to help produce a pharmaceutical product			1.2.2.3	1	Genetic materials from all biota	1.2.1.3	14	Medicinal, biochemical and genetic resources	Genetic materials	Genetic materials			√	(no ecoinvent flow currently exists to represent this ES class)								Amount of individual genes that can be extracted from organisms for the design and construction of new biological entities
CICES	Provisioning (Biotic)	Other types of provisioning service from biotic sources	Other	Other	Use nested codes to allocate other provisioning services from living systems to appropriate Groups and Classes								1.3.X.X	1	Not recognised in V4.3	N/A	-	Not assigned	No equivalent	No equivalent	n/a		n/a										n/a		n/a
CICES	Regulation & Maintenance (Biotic)	Transformation of biochemical or physical inputs to ecosystems	Mediation of wastes or toxic substances of anthropogenic origin by living processes	Bio-remediation by micro-organisms, algae, plants, and animals	By type of living system or by waste or subsistence type	Decomposing wastes	Transformation of an organic or inorganic substance by a species of plant, animal, bacteria, fungi or algae…	…that mitigates its harmful effects and reduces the costs of disposal by other means	Bio-remediation of industrial wastes by disposal on agricultural land Or Bacteria such as Marionobacter that can break the oil down into simple monomers	Sustainable disposal of wastes		Hinga, K.R. and Batchellor, A., 2005. Waste processing and detoxification. Millennium Ecosystem Assessment Series, Ecosystems and Human Well-being: Current State and Trends Vol, 1.	2.1.1.1	1	Bio-remediation by micro-organisms, algae, plants, and animals	2.1.1.1	8, 10	Formation, protection and decontamination of soils and sediments, Regulation of organisms detrimental to humans	Water purification and water treatment, air quality regulation	Waste treatment (water purification), air quality regulation			(√)									Ecosystem functions and processes to be defined in terms of e.g. land use requirements for species ensuring bioremediation
CICES	Regulation & Maintenance (Biotic)	Transformation of biochemical or physical inputs to ecosystems	Mediation of wastes or toxic substances of anthropogenic origin by living processes	Filtration/sequestration/storage/accumulation by micro-organisms, algae, plants, and animals	By type of living system, or by water or substance type	Filtering wastes	The fixing and storage of an organic or inorganic substance by a species of plant, animal, bacteria, fungi or algae	…that mitigates its harmful effects and reduces the costs of disposal by other means	Dust filtration by urban trees Or Macrophytes, for example salt marsh grass, can trap particles in their roots, sequestering wastes/toxicants in the sediment (Govers et al. 2014)	Reduction in respiratory disease			2.1.1.2	1	Filtration/sequestration/storage/accumulation by micro-organisms, algae, plants, and animals And Filtration/sequestration/storage/accumulation by ecosystems	2.1.1.2 & 2.1.2.1	3	Regulation of air quality	Water purification and water treatment, air quality regulation	Waste treatment (water purification), air quality regulation			√	(ecoinvent flow possibly existing, among land use flows, to represent this ES class)								Amount of air pollution in terms of particulate matter (PM) and/or NO2, etc., which can be absorbed by trees;it could also be a forest land use flow necessary to absorb those air pollutants.	(√)	It could be an impact assessment indicator to detect the decrease of PM formation or other air/water/soil pollution event
CICES	Regulation & Maintenance (Biotic)	Transformation of biochemical or physical inputs to ecosystems	Mediation of nuisances of anthropogenic origin	Smell reduction	By type of living system	Reducing smells	The reduction in the impact of odours on people…	…that mitigates its harmful or stressful effect, or the cost of the nuisance	Shelter belts that filter particulates that carry odours Or Birds, epifauna, infauna and bacterial communities contribute to this service by removing material such as rotting algal mats, which is in the littoral zone or offshore but could potentially wash up on shore and produce olfactory and visual impacts	Reduction in nuisance effect of smells from animal lots			2.1.2.1	1	Mediation of smell/noise/visual impacts	2.1.2.3	3	Regulation of air quality	Water purification and water treatment, air quality regulation	Waste treatment (water purification), air quality regulation			(√)									Ecosystem functions and processes to be defined in terms of e.g. land use requirements for species ensuring reduction in nuisance effect of smells
CICES	Regulation & Maintenance (Biotic)	Transformation of biochemical or physical inputs to ecosystems	Mediation of nuisances of anthropogenic origin	Noise attenuation	By type of living system	Reducing noise	The reduction in the impact of noise on people…	…that mitigates its harmful or stressful effect, or the cost of the nuisance	Shelter belts along motorways	Low noise environment	Noise attenuation by trees in urban settings: Fang et al., 2003, Investigation of the noise reduction provided by tree belts. https://www.researchgate.net/publication/222574735_Investigation_of_the_noise_reduction_provided_by_tree_belts		2.1.2.2	0	Mediation of smell/noise/visual impacts	2.1.2.3	9	Regulation of hazards and extreme events	Water purification and water treatment, air quality regulation?	Water purification and water treatment, air quality regulation?			√									Additional area of woodland that should be included in the LCI to compensate for the ES demand to reduce noice in urban and peri-urban environments	(√)	Application of TES approach: use of existing land use impact category indicators (with MINUS sign to capture the demand/supply ratio)
																								Occupation, forest, unspecified	natural resource	land	m2*year			Wald ohne nähere Angaben		More specific forest land occupation flows may be applied
																								Occupation, urban, green area	natural resource	land	m2*year
																								Transformation, from unspecified	natural resource	land	m2				CORINE x	(transformation from any other land use type is also possible…)
																								Transformation, to forest, unspecified	natural resource	land	m2				CORINE 31	More specific forest land transformation flows may be applied
																								Transformation, to urban, green area	natural resource	land	m2
CICES	Regulation & Maintenance (Biotic)	Transformation of biochemical or physical inputs to ecosystems	Mediation of nuisances of anthropogenic origin	Visual screening	By type of living system	Screening unsightly things	The reduction in the visual impact of human structures on people…	…that mitigates its harmful or stressful effect, or the cost of the nuisance	Shelter belts around industrial structures	Visual amenity			2.1.2.3	1	Mediation of smell/noise/visual impacts	2.1.2.3	9	Regulation of hazards and extreme events	Water purification and water treatment, air quality regulation?	Water purification and water treatment, air quality regulation?			√									Additional area of woodland that should be included in the LCI to compensate for the ES demand to increase the quality of visual amenities in urban and peri-urban environments	(√)	Application of TES approach: use of existing land use impact category indicators (with MINUS sign to capture the demand/supply ratio)
																								Occupation, forest, unspecified	natural resource	land	m2*year			Wald ohne nähere Angaben		More specific forest land occupation flows may be applied
																								Occupation, urban, green area	natural resource	land	m2*year
																								Transformation, from unspecified	natural resource	land	m2				CORINE x	(transformation from any other land use type is also possible…)
																								Transformation, to forest, unspecified	natural resource	land	m2				CORINE 31	More specific forest land transformation flows may be applied
																								Transformation, to urban, green area	natural resource	land	m2
CICES	Regulation & Maintenance (Biotic)	Regulation of physical, chemical, biological conditions	Regulation of baseline flows and extreme events	Control of erosion rates	By reduction in risk, area protected	Controlling or preventing soil loss	The reduction in the loss of material by virtue of the stabilising effects of the presence of plants and animals…	…that mitigates or prevents potential damage to human use of the environment or human health and safety	The capacity of vegetation to prevent or reduce the incidence of soil erosion Or Macroalgae, microphytobenthos, macrophytes and biogenic reef structures (epifauna and infauna) all contribute through sediment stabilisation	Reduction of damage (and associated costs) of sediment input to water courses	Reducing water-induced erosion: Frank et al., 2014, Making use of the ecosystem services concept in regional planning - trade-offs from reducing water erosion. http://link.springer.com/article/10.1007/s10980-014-9992-3/fulltext.html		2.2.1.1	1	Stabilisation and control of erosion rates	2.2.1.1	8	Formation, protection and decontamination of soils and sediments	Erosion regulation	Erosion prevention			√									Additional area of woodland, grassland or any other land covers that may prevent from erosion, which should be included in the LCI to compensate for the ES demand of soil protection from erosion	(√)	Application of TES approach: use of existing land use impact category indicators (with MINUS sign to capture the demand/supply ratio)
																								Occupation, forest, unspecified	natural resource	land	m2*year			Wald ohne nähere Angaben
																								Occupation, cropland fallow (non-use)	natural resource	land	m2*year			Angebaute Brachen in Fruchtfolgen
																								Occupation, field margin/hedgerow	natural resource	land	m2*year
																								Occupation, forest, extensive	natural resource	land	m2*year
																								Occupation, forest, primary (non-use)	natural resource	land	m2*year
																								Occupation, forest, secondary (non-use)	natural resource	land	m2*year
																								Occupation, shrub land, sclerophyllous	natural resource	land	m2*year			Hecken, Uferzonen, Schonstreifen, Ruderal- und Sukzessionsfl., Seitenstreifen
																								Occupation, grassland, natural (non-use)	natural resource	land	m2*year
																								Occupation, grassland, natural, for livestock grazing	natural resource	land	m2*year
																								Transformation, from unspecified	natural resource	land	m2				CORINE x	(transformation from any other land use type is also possible…)
																								Transformation, to forest, unspecified	natural resource	land	m2				CORINE 31
																								Transformation, to cropland fallow (non-use)	natural resource	land	m2				CORINE 211c
																								Transformation, to field margin/hedgerow	natural resource	land	m2
																								Transformation, to forest, extensive	natural resource	land	m2				CORINE not known
																								Transformation, to forest, primary (non-use)	natural resource	land	m2
																								Transformation, to forest, secondary (non-use)	natural resource	land	m2
																								Transformation, to grassland, natural (non-use)	natural resource	land	m2
																								Transformation, to grassland, natural, for livestock grazing	natural resource	land	m2
																								Transformation, to heterogeneous, agricultural	natural resource	land	m2				CORINE 243a
																								Transformation, to unspecified, natural (non-use)	natural resource	land	m2
CICES	Regulation & Maintenance (Biotic)	Regulation of physical, chemical, biological conditions	Regulation of baseline flows and extreme events	Buffering and attenuation of mass movement	By reduction in risk, area protected	Stopping landslides and avalanches harming people	The reduction in the speed of movement of solid material by virtue of the stabilising effects of the presence of plants and animals…	…that mitigates or prevents potential damage to human use of the environment or human health and safety	The capacity of forest cover to prevent or mitigate the extent and force of snow avalanche	Reduction in cost to human lives and physical damage to infrastructure			2.2.1.2	1	Buffering and attenuation of mass flows	2.2.1.2	9	Regulation of hazards and extreme events	Erosion regulation	Erosion prevention			√									Additional area of woodland that should be included in the LCI to compensate for the ES demand to protect from landslides and avalanches	(√)	Application of TES approach: use of existing land use impact category indicators (with MINUS sign to capture the demand/supply ratio)
																								Occupation, forest, unspecified	natural resource	land	m2*year			Wald ohne nähere Angaben		More specific forest land occupation flows may be applied
																								Transformation, from unspecified	natural resource	land	m2				CORINE x	(transformation from any other land use type is also possible…)
																								Transformation, to forest, unspecified	natural resource	land	m2				CORINE 31	More specific forest land transformation flows may be applied
CICES	Regulation & Maintenance (Biotic)	Regulation of physical, chemical, biological conditions	Regulation of baseline flows and extreme events	Hydrological cycle and water flow regulation (Including flood control, and coastal protection)	By depth/volumes	Regulating the flows of water in our environment	The regulation of water flows by virtue of the chemical and physical properties or characteristics of ecosystems….	…that assists people in managing and using hydrological systems, and mitigates or prevents potential damage to human use, health or safety	The capacity of vegetation to retain water and release it slowly, Or The capacity of mangroves to mitigate the effects of tsunamis Or Localised coastal influences on the hydrological cycle by phytoplankton producing Dimethylsulphide (DMS) and localised flow changes due to algal and higher plant structures. Macroalgae beds, such as a kelp forest, macrophytes and biogenic reefs (epifauna and infaun…	Mitigation of damage as a result of reduced in magnitude and frequency of flood/storm events	Regulation of water flows: McCartney et al., 2013, Evaluating the Flow Regulating Functions of Natural Ecosystems in the Zambezi River basin. https://cgspace.cgiar.org/handle/10568/39933		2.2.1.3	1	Hydrological cycle and water flow maintenance And Flood protection	2.2.2.1 & 2.2.2.2	6	Regulation of freshwater quantity, location and timing	Water regulation	Regulation of water flows, regulation of extreme events			√									Additional area of vegetation (woodland, field margins, etc.) that should be included in the LCI to compensate for the ES demand to protect from flooding events	(√)	Application of TES approach: use of existing land use impact category indicators (with MINUS sign to capture the demand/supply ratio)
																								Occupation, forest, unspecified	natural resource	land	m2*year			Wald ohne nähere Angaben		More specific or different vegetated land occupation flows may be applied
																								Occupation, field margin/hedgerow	natural resource	land	m2*year					More specific or different vegetated land occupation flows may be applied
																								Transformation, from unspecified	natural resource	land	m2				CORINE x	(transformation from any other land use type is also possible…)
																								Transformation, to field margin/hedgerow	natural resource	land	m2				CORINE 31	More specific or different vegetation land transformation flows may be applied
																								Transformation, to forest, unspecified	natural resource	land	m2					More specific or different vegetation land transformation flows may be applied
CICES	Regulation & Maintenance (Biotic)	Regulation of physical, chemical, biological conditions	Regulation of baseline flows and extreme events	Wind protection	By reduction in risk, area protected	Protecting people from winds	The reduction in the speed of movement of air by virtue of the presence of plants and animals…	…that mitigates or prevents potential damage to human use of the environment or human health and safety	Wind breaks	Reduction in scale or frequency of damage to crops	Hedgerows offering wind breaks in agroecosystems: Burel, 1996, Hedgerows and Their Role in Agricultural Landscapes. http://www.tandfonline.com/doi/abs/10.1080/07352689.1996.10393185		2.2.1.4	0	Storm protection	2.2.3.1	9	Regulation of hazards and extreme events	Natural hazard regulation	Regulation of water flows, regulation of extreme events			√									Additional area of woodland that should be included in the LCI to compensate for the ES demand to protect from wind	(√)	Application of TES approach: use of existing land use impact category indicators (with MINUS sign to capture the demand/supply ratio)
																								Occupation, forest, unspecified	natural resource	land	m2*year			Wald ohne nähere Angaben		More specific forest land occupation flows may be applied
																								Transformation, from unspecified	natural resource	land	m2				CORINE x	(transformation from any other land use type is also possible…)
																								Transformation, to forest, unspecified	natural resource	land	m2				CORINE 31	More specific forest land transformation flows may be applied
CICES	Regulation & Maintenance (Biotic)	Regulation of physical, chemical, biological conditions	Regulation of baseline flows and extreme events	Fire protection	By reduction in risk, area protected	Protecting people from fire	The reduction in the incidence, intensity or speed of spread of fire by virtue of the presence of plants and animals…	…that mitigates or prevents potential damage to human use of the environment or human health and safety	The capacity of ecosystems to reduce the frequency, spread or magnitudes of fires. (e.g. wetland area between forests, or fire belt in woodland containing species of low combustibility)	Reduction in fire damage costs	fuelbreaks: Ruiz-Mirazo, 2011, Two-year evaluation of fuelbreaks grazed by livestock in the wildfire prevention programme in Analusia (Spain).		2.2.1.5	0	Not recognised in V4.3	N/A	13	Materials and assistance	Natural hazard regulation?	Regulation of water flows, regulation of extreme events?			√									Additional area for wetlands/lakes creation that should be included in the LCI to compensate for the ES demand to protect from fires	(√)	Application of TES approach: use of existing land use impact category indicators (with MINUS sign to capture the demand/supply ratio)
																								Occupation, inland waterbody, unspecified	natural resource	land	m2*year
																								Occupation, lake, artificial	natural resource	land	m2*year
																								Occupation, lake, natural (non-use)	natural resource	land	m2*year
																								Transformation, from unspecified	natural resource	land	m2				CORINE x	(transformation from any other land use type is also possible…)
																								Occupation, wetland, coastal (non-use)	natural resource	land	m2*year
																								Occupation, wetland, inland (non-use)	natural resource	land	m2*year
																								Transformation, to inland waterbody, unspecified	natural resource	land	m2
																								Transformation, to lake, artificial	natural resource	land	m2				CORINE 512a
																								Transformation, to lake, natural (non-use)	natural resource	land	m2
																								Transformation, to wetland, coastal (non-use)	natural resource	land	m2
																								Transformation, to wetland, inland (non-use)	natural resource	land	m2
CICES	Regulation & Maintenance (Biotic)	Regulation of physical, chemical, biological conditions	Lifecycle maintenance, habitat and gene pool protection	Pollination (or 'gamete' dispersal in a marine context)	By amount and pollinator	Pollinating our fruit trees and other plants	The fertilisation of crops by plants or animals…	…that maintains or increases the abundance and/or diversity of other species that people use or enjoy	Providing a habitat for native pollinators Or In the context of societal efforts for the restoration of, for example, seagrass beds , it can be considered final since seed dispersal can occur through this service rather than artificially.	Contribution to yield of fruit crops	Seed dispersal in agricultural ecosystems: Benvenuti, 2007, Weed seed movement and dispersal strategies in the agricultural environment. http://onlinelibrary.wiley.com/doi/10.1111/j.1445-6664.2007.00249.x/full, pollinators in agricultural ecosystems: Aizen et al., 2009, How much does agriculture depend on pollinators? Lessons from long-term trends in crop production. http://aob.oxfordjournals.org…		2.2.2.1	1	Pollination and seed dispersal	2.3.1.1	2	Pollination and dispersal of seeds and other propagules	Pollination	Pollination			√	(no ecoinvent flow currently exists to represent this ES class)								Number of colonies/individuals/abundance of, or area of habitat for, wild pollinator species should be included in the LCI to compensate for the ES demand to provide pollination service	(√)	Application of TES approach: use of existing land use impact category indicators (with MINUS sign to capture the demand/supply ratio)	(√)	Habitat for pollinator species
CICES	Regulation & Maintenance (Biotic)	Regulation of physical, chemical, biological conditions	Lifecycle maintenance, habitat and gene pool protection	Seed dispersal	By amount and dispersal agent	Spreading the seeds of wild plants	The dispersal of seeds and spores….	….of plants and other organisms that are important to people in use and non-use terms	Acorn dispersal by Eurasian Jays	Tree regeneration in parkland	Hougner, C., Colding, J. and Söderqvist, T., 2006. Economic valuation of a seed dispersal service in the Stockholm National Urban Park, Sweden. Ecological Economics, 59(3), pp.364-374.		2.2.2.2	1	Pollination and seed dispersal	2.3.1.1	2	Pollination and dispersal of seeds and other propagules	No equivalent	Biological control			(√)									Ecosystem functions and processes to be defined in terms of e.g. land use requirements for species ensuring seeds dispersal
CICES	Regulation & Maintenance (Biotic)	Regulation of physical, chemical, biological conditions	Lifecycle maintenance, habitat and gene pool protection	Maintaining nursery populations and habitats (including gene pool protection)	By amount and source	Providing habitats for wild plants and animals that can be useful to us	The presence of ecological conditions (usually habitats) necessary for sustaining populations of species….	…that people use or enjoy	Important nursery habitats include estuaries, seagrass, kelp forest, wetlands, soft sediment, hard bottom, shell bottom and water column habitats. Floating seaweed clumps (macroalgae) form rafts under which juvenile fish aggregate e.g. in the North Sea in pelagic habitats	Sustainable populations of useful or iconic species that contribute to a service in another ecosystem.	Liquete, C., Cid, N., Lanzanova, D., Grizzetti, B. and Reynaud, A., 2016. Perspectives on the link between ecosystem services and biodiversity: The assessment of the nursery function. Ecological Indicators, 63, pp.249-257.		2.2.2.3	1	Maintaining nursery populations and habitats	2.3.1.2	1	Habitat creation and maintenance	No equivalent	Biological control			√	(ecoinvent flow possibly existing, among land use flows, to represent this ES class)								The class and size of land cover(s) needed to maintain nursery populations and habitats (including gene pool protection) should be defined case-by-case	(√)	Application of TES approach: use of existing land use impact category indicators (with MINUS sign to capture the demand/supply ratio)	(√)	Habitat to maintain nursery populations
CICES	Regulation & Maintenance (Biotic)	Regulation of physical, chemical, biological conditions	Pest and disease control	Pest control (including invasive species)	By reduction in incidence, risk, area protected by type of living system	Controlling pests and invasive species	The reduction by biological interactions of the incidence of species...	…that prevent or reduce the output of food, material or energy from ecosystems, or their cultural importance, by consumption of biomass or competition	Providing a habitat for native pest control agents Or In the Black Sea, the recovery of fish populations and an alien invader, the Beroe comb jelly, (both of whom predate nuisance alien comb jellies, Finenko et al.2009) may have been the most important contributing factors for the control of the Mnemiopsis leidyi alien comb jelly, which caused an ecosystem shift in the late 80s.	Reduction in pest damage to cultivated crop	Natural pest control in agricultural land: Steingroever et al., 2012, Designing agricultural landscapes for natural pest control: a transdisciplinary approach in the Hoeksche Waard. http://link.springer.com/article/10.1007%2Fs10980-010-9489-7		2.2.3.1	1	Pest control	2.3.2.1	10	Regulation of organisms detrimental to humans	Pest regulation	Biological control			√	(ecoinvent flow possibly existing, among land use flows, to represent this ES class)								The class and size of land cover(s) needed to maintain or enhance the habitat for native pest control agents should be defined case-by-case	(√)	Application of TES approach: use of existing land use impact category indicators (with MINUS sign to capture the demand/supply ratio)	(√)	Habitat for native pest control agents
CICES	Regulation & Maintenance (Biotic)	Regulation of physical, chemical, biological conditions	Pest and disease control	Disease control	By reduction in incidence, risk, area protected by type of living system	Controlling disease	The reduction by biological interactions of the incidence of species...	…that otherwise could prevent or reduce the output of food, material or energy from ecosystems, or their cultural importance, by hindering or damaging the ecological functioning of useful species	Presence of native disease control agents such as microbial antagonists for the control of postharvest diseases	Reduction in disease damage due to harvested fruit or vegetables	Droby, S., 2005, March. Improving quality and safety of fresh fruits and vegetables after harvest by the use of biocontrol agents and natural materials. In I International Symposium on Natural Preservatives in Food Systems 709 (pp. 45-52).		2.2.3.2	1	Disease control	2.3.2.2	10	Regulation of organisms detrimental to humans	Disease regulation	Biological control			√	(ecoinvent flow possibly existing, among land use flows, to represent this ES class)								The class and size of land cover(s) needed to maintain or enhance the habitat for native disease control agents (such as microbial antagonists for the control of postharvest diseases) should be defined case-by-case	(√)	Application of TES approach: use of existing land use impact category indicators (with MINUS sign to capture the demand/supply ratio)	(√)	Habitat for for native disease control agents (such as microbial antagonists for the control of postharvest diseases)
CICES	Regulation & Maintenance (Biotic)	Regulation of physical, chemical, biological conditions	Regulation of soil quality	Weathering processes and their effect on soil quality	By amount/concentration and source	Ensuring soils form and develop	Biological decomposition of minerals…	…that maintain fertility or conditions necessary for human use	Inorganic nutrient release in cultivated fields	Maintenance of soil quality and hence capability of soil for human use.			2.2.4.1	0	Weathering processes	2.3.3.1	8	Formation, protection and decontamination of soils and sediments	Soil formation (supporting service)	Maintenance of soil fertility			(√)									Ecosystem functions and processes to be defined in terms of e.g. biological cycling enhancement for inorganic nutrient release	(√)	It could be an impact assessment indicator to detect the decrease in soil inorganic pollutants or ecotoxicity due to more sustainable management practices
CICES	Regulation & Maintenance (Biotic)	Regulation of physical, chemical, biological conditions	Regulation of soil quality	Decomposition and fixing processes and their effect on soil quality	By amount/concentration and source	Ensuring the organic matter in our soils is maintained	Decomposition of biological materials and their incorporation in soils	…that maintains their characteristics necessary for human use	Decomposition of plant residue; N-fixation by legumes	Maintenance of soil quality; legumes used to increase/maintain N-levels in soil			2.2.4.2	1	Decomposition and fixing processes	2.3.3.2	8	Formation, protection and decontamination of soils and sediments	Soil formation (supporting service)	Maintenance of soil fertility			√	(ecoinvent flow possibly existing to represent this ES class: either elementary flow of Nitrogen as input, or Nitrogen as a soil emission flow with negative sign in the LCI dataset)								Any elementary flow of Nitrogen in soil	(√)	It could be an impact assessment indicator to detect the decrease of nitrogen in soil due to more sustainable management practices
CICES	Regulation & Maintenance (Biotic)	Regulation of physical, chemical, biological conditions	Water conditions	Regulation of the chemical condition of freshwaters by living processes	By type of living system	Controlling the chemical quality of freshwater	Maintenance of the chemical condition of fresh waters by plant or animal species….	…that enable human use or health	Use of buffer strips along water courses to remove nutrients in runoff	Reduced damage costs nutrient runoff from agroecosystems	water purification mapped and assessed as ecosystem service by MAES et al., 2012, PERR Report No 4. http://www.peer.eu/fileadmin/user_upload/publications/PEER_report_4_phase_2.pdf, Finlay et al., 2012, Human influences on nitrogen removal in lakes.		2.2.5.1	0	Chemical condition of freshwaters	2.3.4.1	7	Regulation of freshwater and coastal water quality	Water regulation	Water			√									Additional area of vegetation (woodland, field margins, etc.) that should be included in the LCI to compensate for the ES demand to enhance water quality regulation	(√)	Application of TES approach: use of existing land use impact category indicators (with MINUS sign to capture the demand/supply ratio)
																								Occupation, forest, unspecified	natural resource	land	m2*year			Wald ohne nähere Angaben		More specific or different vegetated land occupation flows may be applied
																								Occupation, field margin/hedgerow	natural resource	land	m2*year					More specific or different vegetated land occupation flows may be applied
																								Transformation, from unspecified	natural resource	land	m2				CORINE x	(transformation from any other land use type is also possible…)
																								Transformation, to field margin/hedgerow	natural resource	land	m2				CORINE 31	More specific or different vegetation land transformation flows may be applied
																								Transformation, to forest, unspecified	natural resource	land	m2					More specific or different vegetation land transformation flows may be applied
CICES	Regulation & Maintenance (Biotic)	Regulation of physical, chemical, biological conditions	Water conditions	Regulation of the chemical condition of salt waters by living processes	By type of living system	Controlling the chemical quality of salt water	Maintenance of the chemical condition of salt waters by plant or animal species….	…that enable human use or health	Fish communities that regulate the resilience and resistance of coral reefs to eutrophication	Health of coral reef and its benefits to people in terms of buffering wave action etc.	Duarte, C.M., 2009. Coastal eutrophication research: a new awareness. Hydrobiologia, 629(1), pp.263-269.		2.2.5.2	1	Chemical condition of salt waters	2.3.4.2	7	Regulation of freshwater and coastal water quality	Water regulation	Water			(√)	(no ecoinvent flow currently exists to represent this ES class)								Abundance of, or seawater surface for, fish communities should be included in the LCI to compensate for the ES demand to provide regulation of the chemical condition of salt waters	(√)	Application of TES approach: use of existing land use impact category indicators (with MINUS sign to capture the demand/supply ratio)	(√)	Habitat for fish communities that regulate the resilience and resistance of coral reefs to eutrophication
CICES	Regulation & Maintenance (Biotic)	Regulation of physical, chemical, biological conditions	Atmospheric composition and conditions	Regulation of chemical composition of atmosphere and oceans	By contribution of type of living system to amount, concentration or climatic parameter	Regulating our global climate	Regulation of the concentrations of gases in the atmosphere	….that impact on global climate or oceans	Sequestration of carbon in tropical peatlands	Climate regulation resulting in avoided damage costs Or Mitigation of impacts of ocean acidification	Tranvik et al., 2009, Lakes and reservoirs as regulators of carbon cycling and climate. http://aslo.org/lo/toc/vol_54/issue_6_part_2/2298.pdf; Storage of carbon in forests: Liski et al., 2006, Carbon accumulation in Finland's forests 1922 - 2004: estimate obtained by combination of forest inventory data with modelling of biomass, litter and soil. http://www.afs-journal.org/articles/forest/pdf/200…		2.2.6.1	1	Global climate regulation by reduction of greenhouse gas concentrations	2.3.5.1	3	Regulation of air quality	Atmospheric regulation	Climate regulation			√
																								Carbon dioxide, in air	natural resource	in air	kg	000124-38-9			CO2
CICES	Regulation & Maintenance (Biotic)	Regulation of physical, chemical, biological conditions	Atmospheric composition and conditions	Regulation of temperature and humidity, including ventilation and transpiration	By contribution of type of living system to amount, concentration or climatic parameter	Regulating the physical quality of air for people	Mediation of ambient atmospheric conditions (including micro- and mesoscale climates) by virtue of presence of plants….	…that improves living conditions for people	Evaporative cooling provided by urban trees	Increased thermal comfort in cities	Mitigating heat island effects in cities with urban forests: Rosenzweig at al., 2006, MITIGATING NEW YORK CITY'S HEAT ISLAND WITH URBAN FORESTRY, LIVING ROOFS, AND LIGHT SURFACES. http://citeseerx.ist.psu.edu/viewdoc/download?doi=10.1.1.543.4848&rep=rep1&type=pdf		2.2.6.2	1	Micro and regional climate regulation &Ventilation and transpiration	2.3.5.2 & 2.2.3.2	4	Regulation of climate	Atmospheric regulation	Climate regulation			√									Additional area of woodland that should be included in the LCI to compensate for the ES demand to reduce urban heat island effect	(√)	Application of TES approach: use of existing land use impact category indicators (with MINUS sign to capture the demand/supply ratio Additionally to a forest land use flow, this ES class can also be measured in terms of avoided energy consumption provided by technological solutions, such as heat pumps.
																								Occupation, forest, unspecified	natural resource	land	m2*year			Wald ohne nähere Angaben		More specific forest land occupation flows may be applied	(√)	Application of TES approach: use of existing land use impact category indicators (with MINUS sign to capture the demand/supply ratio)
																								Occupation, urban, green area	natural resource	land	m2*year
																								Transformation, from unspecified	natural resource	land	m2				CORINE x	(transformation from any other land use type is also possible…)
																								Transformation, to forest, unspecified	natural resource	land	m2				CORINE 31	More specific forest land transformation flows may be applied
																								Transformation, to urban, green area	natural resource	land	m2
CICES	Regulation & Maintenance (Biotic)	Other types of regulation and maintenance service by living processes	Other	Other	Use nested codes to allocate other regulating and maintenance services from living systems to appropriate Groups and Classes								2.3.X.X	1	Not recognised in V4.3	N/A	-	Not assigned	No equivalent	No equivalent	n/a		n/a										n/a		n/a
CICES	Cultural (Biotic)	Direct, in-situ and outdoor interactions with living systems that depend on presence in the environmental setting	Physical and experiential interactions with natural environment	Characteristics of living systems that that enable activities promoting health, recuperation or enjoyment through active or immersive interactions	By type of living system or environmental setting	Using the environment for sport and recreation; using nature to help stay fit	The biophysical characteristics or qualities of species or ecosystems (settings/ cultural spaces)….	…. that are engaged with, used or enjoyed in ways that require physical and cognitive effort	Ecological qualities of woodland that make it attractive to hiker; private gardens Or Opportunities for diving, swimming	Recreation, fitness; de-stressing or mental health; nature-based recreation			3.1.1.1	1	Experiential use of plants, animals and land-/seascapes in different environmental settings	3.1.1.1	6, 16	Regulation of freshwater quantity, location and timing, Physical and psychological experiences	Recreation and ecotourism	Recreation and ecotourism			tbd										tbd		√	Ecosystems for recreational purposes and aesthetic services
CICES	Cultural (Biotic)	Direct, in-situ and outdoor interactions with living systems that depend on presence in the environmental setting	Physical and experiential interactions with natural environment	Characteristics of living systems that enable activities promoting health, recuperation or enjoyment through passive or observational interactions	By type of living system or environmental setting	Watching plants and animals where they live; using nature to destress	The biophysical characteristics or qualities of species or ecosystems (settings/cultural spaces)…..	…. that are viewed/observed by people or enjoyed in other passive ways by virtue of sounds and smells etc.	Mix of species in a woodland of interest to birdwatchers Or Whales, birds, seals and reptiles can be enjoyed by wildlife watchers	Recreation, fitness; de-stressing or mental health; eco-tourism	Species diversity: Lindemann-Matthias et al., 2010, The influence of plant diversity on people's perception and aesthetic appreciation of grassland vegetation. http://www.sciencedirect.com/science/article/pii/S0006320709004406		3.1.1.2	1	Physical use of land-/seascapes in different environmental settings	3.1.1.2	6, 16	Regulation of freshwater quantity, location and timing, Physical and psychological experiences	Recreation and ecotourism	Recreation and ecotourism			tbd										tbd		√	Ecosystems for recreational purposes and aesthetic services
CICES	Cultural (Biotic)	Direct, in-situ and outdoor interactions with living systems that depend on presence in the environmental setting	Intellectual and representative interactions with natural environment	Characteristics of living systems that enable scientific investigation or the creation of traditional ecological knowledge	By type of living system or environmental setting	Researching nature	The biophysical characteristics or qualities of species or ecosystems (settings/cultural spaces)…..	…that are the subject matter for insitu research	Site of special scientific interest, Natura 2000 site	Knowledge about the environment and nature			3.1.2.1	1	Scientific	3.1.2.1	6, 15	Regulation of freshwater quantity, location and timing, Learning and inspiration	Knowledge systems and educational values, cultural diversity, aesthetic values	Information and cognitive development			tbd										tbd		√	Ecosystems for recreational purposes and aesthetic services
CICES	Cultural (Biotic)	Direct, in-situ and outdoor interactions with living systems that depend on presence in the environmental setting	Intellectual and representative interactions with natural environment	Characteristics of living systems that enable education and training	By type of living system or environmental setting	Studying nature	The biophysical characteristics or qualities of species or ecosystems (settings/cultural spaces)…..	…that are the subject matter for insitu teaching or skill development	Site used for voluntary conservation activities	Skills or knowledge about environmental management			3.1.2.2	1	Educational	3.1.2.2	6, 15	Regulation of freshwater quantity, location and timing, Learning and inspiration	Knowledge systems and educational values, cultural diversity, aesthetic values	Information and cognitive development			tbd										tbd		√	Ecosystems for recreational purposes and aesthetic services
CICES	Cultural (Biotic)	Direct, in-situ and outdoor interactions with living systems that depend on presence in the environmental setting	Intellectual and representative interactions with natural environment	Characteristics of living systems that are resonant in terms of culture or heritage	By type of living system or environmental setting	The things in nature that help people identify with the history or culture of where they live or come from	The biophysical characteristics or qualities of species or ecosystems (settings/cultural spaces)…..	…that contribute to cultural heritage or historical knowledge	Sherwood Forest	Tourism, local identify			3.1.2.3	1	Heritage, cultural	3.1.2.3	6, 17	Regulation of freshwater quantity, location and timing, Supporting identities	Knowledge systems and educational values, cultural diversity, aesthetic values	Inspiration for culture, art and design, aesthetic information			tbd										tbd		√	Ecosystems for recreational purposes and aesthetic services
CICES	Cultural (Biotic)	Direct, in-situ and outdoor interactions with living systems that depend on presence in the environmental setting	Intellectual and representative interactions with natural environment	Characteristics of living systems that enable aesthetic experiences	By type of living system or environmental setting	The beauty of nature	The biophysical characteristics or qualities of species or ecosystems (settings/cultural spaces)…..	… that are appreciated for their inherent beauty	Area of Outstanding Natural Beauty; panorama site	Artistic inspiration			3.1.2.4	1	Aesthetic	3.1.2.5	6, 15, 16	Regulation of freshwater quantity, location and timing, Learning and inspiration	Knowledge systems and educational values, cultural diversity, aesthetic values	Inspiration for culture, art and design, aesthetic information			tbd										tbd		√	Ecosystems for recreational purposes and aesthetic services
CICES	Cultural (Biotic)	Indirect, remote, often indoor interactions with living systems that do not require presence in the environmental setting	Spiritual, symbolic and other interactions with natural environment	Elements of living systems that have symbolic meaning	By type of living system or environmental setting	Using nature to as a national or local emblem	The biophysical characteristics or qualities of species or ecosystems (settings/landscapes/cultural spaces)…..	…that are recognised by people for their cultural, historical or iconic character and which are used as emblems or signifiers of some kind	Bald Eagle	Social cohesion, cultural icon			3.2.1.1	1	Symbolic	3.2.1.1	6, 17	Regulation of freshwater quantity, location and timing, Supporting identities	Spiritual and religious values	Inspiration for culture, art and design, aesthetic information			tbd										tbd		√	Ecosystems for recreational purposes and aesthetic services
CICES	Cultural (Biotic)	Indirect, remote, often indoor interactions with living systems that do not require presence in the environmental setting	Spiritual, symbolic and other interactions with natural environment	Elements of living systems that have sacred or religious meaning	By type of living system or environmental setting	The things in nature that have spiritual importance for people	The biophysical characteristics or qualities of species or ecosystems (settings/landscapes/cultural spaces)…..	...…that are deemed to have sacred or religious significance for people.	Totemic species, such as the turtle	Mental well-being			3.2.1.2	1	Sacred and/or religious	3.2.1.2	6, 17	Regulation of freshwater quantity, location and timing, Supporting identities	Spiritual and religious values	Inspiration for culture, art and design, aesthetic information			tbd										tbd		√	Ecosystems for recreational purposes and aesthetic services
CICES	Cultural (Biotic)	Indirect, remote, often indoor interactions with living systems that do not require presence in the environmental setting	Spiritual, symbolic and other interactions with natural environment	Elements of living systems used for entertainment or representation	By type of living system or environmental setting	The things in nature used to make films or to write books	The biophysical characteristics or qualities of species or ecosystems (settings/landscapes/cultural spaces)…..	.. that provide material or subject matter that can be communicated to others via different media for amusement or enjoyment	Archive records or collections	Nature films			3.2.1.3	1	Entertainment	3.1.2.4	6, 13, 17	Regulation of freshwater quantity, location and timing, Materials and assistance	Spiritual and religious values	Inspiration for culture, art and design, aesthetic information			tbd										tbd		√	Ecosystems for recreational purposes and aesthetic services
CICES	Cultural (Biotic)	Indirect, remote, often indoor interactions with living systems that do not require presence in the environmental setting	Other biotic characteristics that have a non-use value	Characteristics or features of living systems that have an existence value	By type of living system or environmental setting	The things in nature that we think should be conserved	The biophysical characteristics or qualities of species or ecosystems (settings/landscapes/cultural spaces)…..	…..which people seek to preserve because of their non-utilitarian qualities	Areas designated as wilderness	Mental/Moral well-being			3.2.2.1	1	Existence	3.2.2.1	6, 18	Regulation of freshwater quantity, location and timing, Maintenance of options	No equivalent	No equivalent			tbd										tbd		√	Ecosystems for recreational purposes and aesthetic services
CICES	Cultural (Biotic)	Indirect, remote, often indoor interactions with living systems that do not require presence in the environmental setting	Other biotic characteristics that have a non-use value	Characteristics or features of living systems that have an option or bequest value	By type of living system or environmental setting	The things in nature that we want future generations to enjoy or use	The biophysical characteristics or qualities of species or ecosystems (settings/landscapes/cultural spaces)…..	…..which people seek to preserve for future generations for whatever reason	Endangered species or habitat	Moral well-being			3.2.2.2	1	Bequest	3.2.2.2	18	Maintenance of options	No equivalent	No equivalent			tbd										tbd		√	Ecosystems for recreational purposes and aesthetic services
CICES	Cultural (Biotic)	Other characteristics of living systems that have cultural significance	Other	Other	Use nested codes to allocate other cultural services from living systems to appropriate Groups and Classes								3.3.X.X	1	Not recognised in V4.3	N/A	-	Not assigned	No equivalent	No equivalent	n/a		n/a										n/a		n/a
CICES	Provisioning (Abiotic)	Water	Surface water used for nutrition, materials or energy	Surface water for drinking	By amount, type, source	Drinking water from sources at the ground surface	Natural, surface water bodies….	… that provide a source of drinking water	Volume and characteristics of water from a natural springs	Potable water in public supply system		UNEP, 2005, Freshwater ecosystem services. http://www.unep.org/maweb/documents/document.312.aspx.pdf	4.2.1.1	Not assigned	Surface water for drinking	1.1.2.1	-	Hydrological NCP are fundamentally conceived as regulating NCP, because the primary impact of ecosystems on water is the modification of its flows, not the creation or breakdown of water molecules	Water	Water			√
													4.2.1.1
													4.2.1.1																			to be checked how the flow is used in ecoinvent (possibly not for drinking purposes…)
CICES	Provisioning (Abiotic)	Water	Surface water used for nutrition, materials or energy	Surface water used as a material (non-drinking purposes)	By amount & source	Surface water that we can use for things other than drinking	Natural, surface water bodies….	… that provide water for that can be used as a material or for cooling	Temperature and volume of water that can be used for cooling or irrigation	Reduced energy costs; glass house cultivation		UNEP, 2005, Freshwater ecosystem services. http://www.unep.org/maweb/documents/document.312.aspx.pdf	4.2.1.2	Not assigned	Surface water for non-drinking purposes	1.2.2.1	-	Hydrological NCP are fundamentally conceived as regulating NCP, because the primary impact of ecosystems on water is the modification of its flows, not the creation or breakdown of water molecules	Water	Water			√
																								Water, lake	natural resource	in water	m3	007732-18-5			H2O
													4.2.1.2											Water, river	natural resource	in water	m3	007732-18-5			H2O
													4.2.1.2											Water, cooling, unspecified natural origin	natural resource	in water	m3	007732-18-5			H2O
													4.2.1.2											Water, unspecified natural origin	natural resource	in water	m3	007732-18-5			H2O
													4.2.1.2											Water, salt, ocean	natural resource	in water	m3	007732-18-5			H2O
													4.2.1.2											Water, salt, sole	natural resource	in water	m3	007732-18-5			H2O
													4.2.1.2											Water, turbine use, unspecified natural origin	natural resource	in water	m3	007732-18-5			H2O
CICES	Provisioning (Abiotic)	Water	Surface water used for nutrition, materials or energy	Freshwater surface water used as an energy source	By amount, type, source	Hydropower	The flow of water on land….	...that can be converted to electrical or mechanical energy	Hydraulic potential (Head)	HEP			4.2.1.3	Not assigned	Not recognised in V4.3	N/A	-	Hydrological NCP are fundamentally conceived as regulating NCP, because the primary impact of ecosystems on water is the modification of its flows, not the creation or breakdown of water molecules	Water	Water			√
																								Energy, potential (in hydropower reservoir), converted	natural resource	in water	MJ
CICES	Provisioning (Abiotic)	Water	Surface water used for nutrition, materials or energy	Coastal and marine water used as energy source	By amount, type, source	Wave or tidal power	The movement of waves or current…	...that can be converted to electrical or mechanical energy	Tidal velocity	Tidal power			4.2.1.4	Not assigned	Not recognised in V4.3	N/A	-	Hydrological NCP are fundamentally conceived as regulating NCP, because the primary impact of ecosystems on water is the modification of its flows, not the creation or breakdown of water molecules	Water	Water			√
																								Energy, potential (in hydropower reservoir), converted	natural resource	in water	MJ					Not explicitly representative / adapted for purpose (closest flow found)
													4.2.1.4											Water, salt, ocean	natural resource	in water	m3	007732-18-5			H2O	Not explicitly representative / adapted for purpose (closest flow found)
CICES	Provisioning (Abiotic)	Water	Ground water for used for nutrition, materials or energy	Ground (and subsurface) water for drinking	By amount, type, source	Dirking water from the below ground	Natural, below ground water bodies or aquifers…	… that provide a source of drinking water	Aquifer volume and characteristics	Potable water in public supply system; mineral water		UNEP, 2005, Freshwater ecosystem services. http://www.unep.org/maweb/documents/document.312.aspx.pdf	4.2.2.1	Not assigned	Ground water for drinking	1.1.2.2	-	Hydrological NCP are fundamentally conceived as regulating NCP, because the primary impact of ecosystems on water is the modification of its flows, not the creation or breakdown of water molecules	Water	Water			√
																								Water, well, in ground	natural resource	in water	m3	007732-18-5			H2O	to be confirmed how the flow is used in ecoinvent (likely used for drinking purposes…)
													4.2.2.1											Water, unspecified natural origin	natural resource	fossil well	m3	007732-18-5				to be checked how the flow is used in ecoinvent (possibly not for drinking purpose)
													4.2.2.1											Water, unspecified natural origin	natural resource	in ground	m3	007732-18-5				to be checked how the flow is used in ecoinvent (possibly not for drinking purpose)
CICES	Provisioning (Abiotic)	Water	Ground water for used for nutrition, materials or energy	Ground water (and subsurface) used as a material (non-drinking purposes)	By amount & source	Sub-surface water that we can use for things other than drinking	Natural below ground water bodies or aquifers…	… that provide water for that can be used as a material or for cooling	Characteristics and volume of water that can be used for washing purposes	Reduced material costs		UNEP, 2005, Freshwater ecosystem services. http://www.unep.org/maweb/documents/document.312.aspx.pdf	4.2.2.2	Not assigned	Ground water as source of energy	1.2.2.2	-	Hydrological NCP are fundamentally conceived as regulating NCP, because the primary impact of ecosystems on water is the modification of its flows, not the creation or breakdown of water molecules	Water	Water			√
																								Water, well, in ground	natural resource	in water	m3	007732-18-5			H2O
													4.2.2.2											Water, unspecified natural origin	natural resource	fossil well	m3	007732-18-5
													4.2.2.2											Water, unspecified natural origin	natural resource	in ground	m3	007732-18-5
CICES	Provisioning (Abiotic)	Water	Ground water for used for nutrition, materials or energy	Ground water (and subsurface) used as an energy source	By amount & source	Sub-surface water that we can use as a source of energy	Natural below ground water bodies or aquifers…	… that provide water at temperatures that are useful	Hot water and steam vents	Reduces energy costs			4.2.2.3	Not assigned	Ground water for non-drinking purposes	N/A	-	Hydrological NCP are fundamentally conceived as regulating NCP, because the primary impact of ecosystems on water is the modification of its flows, not the creation or breakdown of water molecules	Water	Water			√
																								Energy, geothermal, converted	natural resource	in ground	MJ					to be confirmed how the flow is used in ecoinvent (likely used in the geothermal energy power plant that uses hot water)
													4.2.2.3											Water, unspecified natural origin	natural resource	fossil well	m3	007732-18-5				to be checked how the flow is used in ecoinvent (possibly used in the geothermal energy power plant that uses hot water)
													4.2.2.3											Water, unspecified natural origin	natural resource	in ground	m3	007732-18-5				to be checked how the flow is used in ecoinvent (possibly used in the geothermal energy power plant that uses hot water)
CICES	Provisioning (Abiotic)	Water	Other aqueous ecosystem outputs	Other	Use nested codes to allocate other provisioning services from non-living systems to appropriate Groups and Classes								4.2.X.X	Not assigned	Not recognised in V4.3	N/A	-	Hydrological NCP are fundamentally conceived as regulating NCP, because the primary impact of ecosystems on water is the modification of its flows, not the creation or breakdown of water molecules	Water	Water			√
													4.3.1.2											Iodine, 0.03% in water	natural resource	in water	kg	007553-56-2			I2	To be checked
													4.3.1.2											Magnesium, 0.13% in water	natural resource	in water	kg	007439-95-4			Mg	To be checked
													4.3.1.2											Bromine, 0.23% in water	natural resource	in water	kg	007726-95-6			Br2	To be checked
													4.3.1.2											Bromine, in water	natural resource	in water	kg	007726-95-6			Br	To be checked
													4.3.1.2											Iodine, in water	natural resource	in water	kg	007553-56-2			I	To be checked
													4.3.1.2											Magnesium, in water	natural resource	in water	kg	007439-95-4			Mg	To be checked
																								Water, unspecified natural origin	natural resource	in water	m3	007732-18-5			H2O	Not explicitly representative / adapted for purpose (closest flow found)
CICES Extended	Provisioning (Abiotic)	Non-aqueous natural abiotic ecosystem outputs	Mineral substances used for nutrition, materials or energy	Mineral substances used for nutritional purposes	Amount by type	Minerals in our food	Reference biophysical or inorganic chemical mechanism/characteristic/property...	…that can be used for nutrition	Salt	Dietary value			4.3.1.1	Not assigned	Minerals	N/A	-	No equivalent	No equivalent	No equivalent			√	(ecoinvent flow existing: it needs to be selected case by case among the "mineral substance flows" listed below)								ecoinvent ideally provides a large number of elementary flows for this ES class among the ones aligned with the below class "Mineral substances used for material purposes"
													4.3.1.2											Sodium chloride, in ground	natural resource	in ground	kg	007647-14-5		chloride	ClNa
													4.3.1.2											Sodium nitrate, in ground	natural resource	in ground	kg	007631-99-4		sodium	NNaO3
CICES Extended	Provisioning (Abiotic)	Non-aqueous natural abiotic ecosystem outputs	Mineral substances used for nutrition, materials or energy	Mineral substances used for material purposes	Amount by type	Natural inorganic materials from nature that we can use	Reference biophysical or inorganic chemical mechanism/characteristic/property...	…that can be used for material purposes	Pigments	Decoration			4.3.1.2	Not assigned	Solid	N/A	-	No equivalent	No equivalent	No equivalent			√
																								Aluminium, 24% in bauxite, 11% in crude ore, in ground	natural resource	in ground	kg	001318-16-7
													4.3.1.2											Anhydrite, in ground	natural resource	in ground	kg	014798-04-0		Calciumsulfat	CaH2O4S
													4.3.1.2											Barite, 15% in crude ore, in ground	natural resource	in ground	kg	007727-34-7
													4.3.1.2											Basalt, in ground	natural resource	in ground	kg	012765-06-9		magnesium	CaMgO6Si2
													4.3.1.2											Borax, in ground	natural resource	in ground	kg	001330-43-4		3,7-dioxido-2,4,6,8,9-pentaoxa-1,3,5,7-tetraborabicyclo[3.3.1]nonane	B4Na2O7
													4.3.1.2											Cadmium, 0.30% in sulfide, Cd 0.18%, Pb, Zn, Ag, In, in ground	natural resource	in ground	kg	007440-43-9			Cd
													4.3.1.2											Calcite, in ground	natural resource	in ground	kg	013397-26-7		carbonate	CCaO3
													4.3.1.2											Carbon, organic, in soil or biomass stock	natural resource	in ground	kg	007440-44-0			C
													4.3.1.2											Carnallite	natural resource	in water	kg	001318-27-0		trichloride	MgCl2-KCl-6H2O
													4.3.1.2											Cerium, 24% in bastnasite, 2.4% in crude ore, in ground	natural resource	in ground	kg	007440-45-1			Ce
													4.3.1.2											Chromium, 25.5% in chromite, 11.6% in crude ore, in ground	natural resource	in ground	kg	007440-47-3			Cr
													4.3.1.2											Chrysotile, in ground	natural resource	in ground	kg			Asbest
													4.3.1.2											Cinnabar, in ground	natural resource	in ground	kg	001344-48-5		sulfanylidenemercury	HgS
													4.3.1.2											Colemanite, in ground	natural resource	in ground	kg	001318-33-8			B3CaH23O7
													4.3.1.2											Copper, 0.52% in sulfide, Cu 0.27% and Mo 8.2E-3% in crude ore, in ground	natural resource	in ground	kg	007440-50-8			Cu
													4.3.1.2											Copper, 0.59% in sulfide, Cu 0.22% and Mo 8.2E-3% in crude ore, in ground	natural resource	in ground	kg	007440-50-8			Cu
													4.3.1.2											Copper, 0.97% in sulfide, Cu 0.36% and Mo 4.1E-2% in crude ore, in ground	natural resource	in ground	kg	007440-50-8			Cu
													4.3.1.2											Copper, 0.99% in sulfide, Cu 0.36% and Mo 8.2E-3% in crude ore, in ground	natural resource	in ground	kg	007440-50-8			Cu
													4.3.1.2											Copper, 1.13% in sulfide, Cu 0.76% and Ni 0.76% in crude ore, in ground	natural resource	in ground	kg	007440-50-8			Cu
													4.3.1.2											Copper, 1.18% in sulfide, Cu 0.39% and Mo 8.2E-3% in crude ore, in ground	natural resource	in ground	kg	007440-50-8			Cu
													4.3.1.2											Copper, 1.42% in sulfide, Cu 0.81% and Mo 8.2E-3% in crude ore, in ground	natural resource	in ground	kg	007440-50-8			Cu
													4.3.1.2											Copper, 2.19% in sulfide, Cu 1.83% and Mo 8.2E-3% in crude ore, in ground	natural resource	in ground	kg	007440-50-8			Cu
													4.3.1.2											Cu, Cu 3.2E+0%, Pt 2.5E-4%, Pd 7.3E-4%, Rh 2.0E-5%, Ni 2.3E+0% in ore, in ground	natural resource	in ground	kg	007440-50-8			Cu
													4.3.1.2											Cu, Cu 5.2E-2%, Pt 4.8E-4%, Pd 2.0E-4%, Rh 2.4E-5%, Ni 3.7E-2% in ore, in ground	natural resource	in ground	kg	007440-50-8			Cu
													4.3.1.2											Diatomite, in ground	natural resource	in ground	kg	007631-86-9		dioxosilane	O2Si
													4.3.1.2											Dolomite, in ground	natural resource	in ground	kg	016389-88-1		calcium	C2CaMgO6
													4.3.1.2											Europium, 0.06% in bastnasite, 0.006% in crude ore, in ground	natural resource	in ground	kg	007440-53-1			Eu
													4.3.1.2											Feldspar, in ground	natural resource	in ground	kg	068476-25-5			AlNaO8Si3
													4.3.1.2											Fluorine, 4.5% in apatite, 1% in crude ore, in ground	natural resource	in ground	kg	007782-41-4			F2
													4.3.1.2											Fluorine, 4.5% in apatite, 3% in crude ore, in ground	natural resource	in ground	kg	007782-41-4			F2
													4.3.1.2											Fluorspar, 92%, in ground	natural resource	in ground	kg	014542-23-5		difluoride	CaF2
													4.3.1.2											Gadolinium, 0.15% in bastnasite, 0.015% in crude ore, in ground	natural resource	in ground	kg	007440-54-2			Gd
													4.3.1.2											Gallium, 0.014% in bauxite, in ground	natural resource	in ground	kg	007440-55-3			Ga
													4.3.1.2											Gold, Au 1.1E-4%, Ag 4.2E-3%, in ore, in ground	natural resource	in ground	kg	007440-57-5			Au
													4.3.1.2											Gold, Au 1.3E-4%, Ag 4.6E-5%, in ore, in ground	natural resource	in ground	kg	007440-57-5			Au
													4.3.1.2											Gold, Au 1.4E-4%, in ore, in ground	natural resource	in ground	kg	007440-57-5			Au
													4.3.1.2											Gold, Au 2.1E-4%, Ag 2.1E-4%, in ore, in ground	natural resource	in ground	kg	007440-57-5			Au
													4.3.1.2											Gold, Au 4.3E-4%, in ore, in ground	natural resource	in ground	kg	007440-57-5			Au
													4.3.1.2											Gold, Au 4.9E-5%, in ore, in ground	natural resource	in ground	kg	007440-57-5			Au
													4.3.1.2											Gold, Au 6.7E-4%, in ore, in ground	natural resource	in ground	kg	007440-57-5			Au
													4.3.1.2											Gold, Au 7.1E-4%, in ore, in ground	natural resource	in ground	kg	007440-57-5			Au
													4.3.1.2											Gypsum, in ground	natural resource	in ground	kg	013397-24-5		calcium	CaH4O6S
													4.3.1.2											Indium, 0.005% in sulfide, In 0.003%, Pb, Zn, Ag, Cd, in ground	natural resource	in ground	kg	007440-74-6			In
													4.3.1.2											Iron, 46% in ore, 25% in crude ore, in ground	natural resource	in ground	kg	007439-89-6			Fe
													4.3.1.2											Kaolinite, 24% in crude ore, in ground	natural resource	in ground	kg	001318-74-7
													4.3.1.2											Kieserite, 25% in crude ore, in ground	natural resource	in ground	kg	014567-64-7			H4MgO5S+2
													4.3.1.2											Lanthanum, 7.2% in bastnasite, 0.72% in crude ore, in ground	natural resource	in ground	kg	007439-91-0			La
													4.3.1.2											Lead, 5.0% in sulfide, Pb 3.0%, Zn, Ag, Cd, In, in ground	natural resource	in ground	kg	007439-92-1			Pb
													4.3.1.2											Lithium, 0.15% in brine, in ground	natural resource	in ground	kg	007439-93-2			Li
													4.3.1.2											Magnesite, 60% in crude ore, in ground	natural resource	in ground	kg	000546-93-0			CMgO3
													4.3.1.2											Manganese, 35.7% in sedimentary deposit, 14.2% in crude ore, in ground	natural resource	in ground	kg	007439-96-5			Mn
													4.3.1.2											Metamorphous rock, graphite containing, in ground	natural resource	in ground	kg
													4.3.1.2											Molybdenum, 0.010% in sulfide, Mo 8.2E-3% and Cu 1.83% in crude ore, in ground	natural resource	in ground	kg	007439-98-7			Mo
													4.3.1.2											Molybdenum, 0.014% in sulfide, Mo 8.2E-3% and Cu 0.81% in crude ore, in ground	natural resource	in ground	kg	007439-98-7			Mo
													4.3.1.2											Molybdenum, 0.016% in sulfide, Mo 8.2E-3% and Cu 0.27% in crude ore, in ground	natural resource	in ground	kg	007439-98-7			Mo
													4.3.1.2											Molybdenum, 0.022% in sulfide, Mo 8.2E-3% and Cu 0.22% in crude ore, in ground	natural resource	in ground	kg	007439-98-7			Mo
													4.3.1.2											Molybdenum, 0.022% in sulfide, Mo 8.2E-3% and Cu 0.36% in crude ore, in ground	natural resource	in ground	kg	007439-98-7			Mo
													4.3.1.2											Molybdenum, 0.025% in sulfide, Mo 8.2E-3% and Cu 0.39% in crude ore, in ground	natural resource	in ground	kg	007439-98-7			Mo
													4.3.1.2											Molybdenum, 0.11% in sulfide, Mo 4.1E-2% and Cu 0.36% in crude ore, in ground	natural resource	in ground	kg	007439-98-7			Mo
													4.3.1.2											Neodymium, 4% in bastnasite, 0.4% in crude ore, in ground	natural resource	in ground	kg	007440-00-8			Nd
													4.3.1.2											Ni, Ni 2.3E+0%, Pt 2.5E-4%, Pd 7.3E-4%, Rh 2.0E-5%, Cu 3.2E+0% in ore, in ground	natural resource	in ground	kg	007440-02-0			Ni
													4.3.1.2											Ni, Ni 3.7E-2%, Pt 4.8E-4%, Pd 2.0E-4%, Rh 2.4E-5%, Cu 5.2E-2% in ore, in ground	natural resource	in ground	kg	007440-02-0			Ni
													4.3.1.2											Nickel, 1.13% in sulfide, Ni 0.76% and Cu 0.76% in crude ore, in ground	natural resource	in ground	kg	007440-02-0			Ni
													4.3.1.2											Nickel, 1.98% in silicates, 1.04% in crude ore, in ground	natural resource	in ground	kg	007440-02-0			Ni
													4.3.1.2											Olivine, in ground	natural resource	in ground	kg
													4.3.1.2											Pd, Pd 2.0E-4%, Pt 4.8E-4%, Rh 2.4E-5%, Ni 3.7E-2%, Cu 5.2E-2% in ore, in ground	natural resource	in ground	kg	007440-05-3		Platin ab Erz
													4.3.1.2											Pd, Pd 7.3E-4%, Pt 2.5E-4%, Rh 2.0E-5%, Ni 2.3E+0%, Cu 3.2E+0% in ore, in ground	natural resource	in ground	kg	007440-05-3		Platin ab Erz
													4.3.1.2											Perlite, in ground	natural resource	in ground	kg	130885-09-5		dioxosilane	Al2CaFe2K2MgNa2O12Si
													4.3.1.2											Phosphorus, 18% in apatite, 12% in crude ore, in ground	natural resource	in ground	kg	007723-14-0			P
													4.3.1.2											Phosphorus, 18% in apatite, 4% in crude ore, in ground	natural resource	in ground	kg	007723-14-0			P
													4.3.1.2											Praseodymium, 0.42% in bastnasite, 0.042% in crude ore, in ground	natural resource	in ground	kg	007440-10-0			Pr
													4.3.1.2											Pt, Pt 2.5E-4%, Pd 7.3E-4%, Rh 2.0E-5%, Ni 2.3E+0%, Cu 3.2E+0% in ore, in ground	natural resource	in ground	kg	007440-06-4		Platin ab Erz
													4.3.1.2											Pt, Pt 4.8E-4%, Pd 2.0E-4%, Rh 2.4E-5%, Ni 3.7E-2%, Cu 5.2E-2% in ore, in ground	natural resource	in ground	kg	007440-06-4		Platin ab Erz
													4.3.1.2											Pumice, in ground	natural resource	in ground	kg			Naturbims, Bimsstein, Bimssand, Bimskies
													4.3.1.2											Pyrite, in ground	natural resource	in ground	kg	001309-36-0			FeS2
													4.3.1.2											Pyrolusite, in ground	natural resource	in ground	kg	014854-26-3
													4.3.1.2											Rh, Rh 2.0E-5%, Pt 2.5E-4%, Pd 7.3E-4%, Ni 2.3E+0%, Cu 3.2E+0% in ore, in ground	natural resource	in ground	kg	007440-16-6
													4.3.1.2											Rh, Rh 2.4E-5%, Pt 4.8E-4%, Pd 2.0E-4%, Ni 3.7E-2%, Cu 5.2E-2% in ore, in ground	natural resource	in ground	kg	007440-16-6
													4.3.1.2											Rhenium, in crude ore, in ground	natural resource	in ground	kg	007440-15-5			Re
													4.3.1.2											Samarium, 0.3% in bastnasite, 0.03% in crude ore, in ground	natural resource	in ground	kg	007440-19-9			Sm
													4.3.1.2											Silver, 0.007% in sulfide, Ag 0.004%, Pb, Zn, Cd, In, in ground	natural resource	in ground	kg	007440-22-4			Ag
													4.3.1.2											Silver, 0.01% in crude ore, in ground	natural resource	in ground	kg	007440-22-4			Ag
													4.3.1.2											Silver, 3.2ppm in sulfide, Ag 1.2ppm, Cu and Te, in crude ore, in ground	natural resource	in ground	kg	007440-22-4			Ag
													4.3.1.2											Silver, Ag 2.1E-4%, Au 2.1E-4%, in ore, in ground	natural resource	in ground	kg	007440-22-4			Ag
													4.3.1.2											Silver, Ag 4.2E-3%, Au 1.1E-4%, in ore, in ground	natural resource	in ground	kg	007440-22-4			Ag
													4.3.1.2											Silver, Ag 4.6E-5%, Au 1.3E-4%, in ore, in ground	natural resource	in ground	kg	007440-22-4			Ag
													4.3.1.2											Sodium sulphate, various forms, in ground	natural resource	in ground	kg	007757-82-6
													4.3.1.2											Spodumene, in ground	natural resource	in ground	kg	001302-37-0		lithium	AlLiO6Si2
													4.3.1.2											Stibnite, in ground	natural resource	in ground	kg	001345-04-6		antimony(III) sulfide	S3Sb2
													4.3.1.2											Sulfur, in ground	natural resource	in ground	kg	007704-34-9			S
													4.3.1.2											Sylvite, 25 % in sylvinite, in ground	natural resource	in ground	kg	007447-40-7		Kali	ClK
													4.3.1.2											Talc, in ground	natural resource	in ground	kg	014807-96-6			H2Mg3O12Si4
													4.3.1.2											Tantalum, 81.9% in tantalite, 1.6E-4% in crude ore, in ground	natural resource	in ground	kg	007440-25-7			Ta
													4.3.1.2											Tellurium, 0.5ppm in sulfide, Te 0.2ppm, Cu and Ag, in crude ore, in ground	natural resource	in ground	kg	013494-80-9			Te
													4.3.1.2											Tin, 79% in cassiterite, 0.1% in crude ore, in ground	natural resource	in ground	kg	007440-31-5			Sn
													4.3.1.2											TiO2, 54% in ilmenite, 2.6% in crude ore, in ground	natural resource	in ground	kg	013463-67-7			O2Ti
													4.3.1.2											TiO2, 95% in rutile, 0.40% in crude ore, in ground	natural resource	in ground	kg	001317-80-2			O2Ti
													4.3.1.2											Ulexite, in ground	natural resource	in ground	kg	001319-33-1		sodium	B5CaH16NaO17
													4.3.1.2											Vermiculite, in ground	natural resource	in ground	kg			Glimmer
													4.3.1.2											Zinc, 9.0% in sulfide, Zn 5.3%, Pb, Ag, Cd, In, in ground	natural resource	in ground	kg	007440-66-6			Zn
													4.3.1.2											Zirconia, as baddeleyite, in ground	natural resource	in ground	kg	001314-23-4
													4.3.1.2											Zirconium, 50% in zircon, 0.39% in crude ore, in ground	natural resource	in ground	kg	007440-67-7		zirconium	Zr
													4.3.1.2											TiO2, 54% in ilmenite, 18% in crude ore, in ground	natural resource	in ground	kg	013463-67-7	Based on Tellnes mine in Norway (58°20', 6°25'), where ilmenite and magnetite is mined from hard-rock ore (Korneliussen, A., 2000, An overview of titanium deposits in Norway). Based on Tellnes mine in Norway (58°20', 6°25'), where ilmenite and magnetite is mined from hard-rock ore (Korneliussen, A., 2000, An overview of titanium deposits in Norway).
													4.3.1.2											Iron, 72% in magnetite, 14% in crude ore, in ground	natural resource	in ground	kg	007439-89-6	Based on Tellnes mine (58°20', 6°25') in Norway. The iron content of hard-rock ore from this mine is 18% (expressed as FeO) (Korneliussen, 2000, An overview of titanium deposits in Norway). Which means, that the pure iron content is (0.18*0.77=) 14% (based on molecular mass). Based on Tellnes mine (58°20', 6°25') in Norway. The iron content of hard-rock ore from this mine is 18% (expressed as FeO…
													4.3.1.2											Gangue, bauxite, in ground	natural resource	in ground	kg		Gangue material extracted during bauxite extraction. Represents total ore extracted minus aluminium and gallium content of the ore, considered the two valuable resources contained in the ore. Gangue material extracted during bauxite extraction. Represents total ore extracted minus aluminium and gallium content of the ore, considered the two valuable resources contained in the ore.
													4.3.1.2											Steatite, in ground	natural resource	in ground	kg	014378-12-2	Steatite can have more bounded water. Other CAS-Number as applicable then: For 3MgO*4SiO*4H2O, CAS-number = 14807-96-6 For MgSiO3, CAS-number = 63210-56-0 Steatite can have more bounded water. Other CAS-Number as applicable then: For 3MgO*4SiO*4H2O, CAS-number = 14807-96-6 For MgSiO3, CAS-number = 63210-56-0	hydron	3MgO*4SiO2*H2O
													4.3.1.2											Gold, Au 9.7E-5%, Ag 7.6E-5%, in ore, in ground	natural resource	in ground	kg	007440-57-5			Au
													4.3.1.2											Gold, Au 6.8E-4%, Ag 1.5E-4%, in ore, in ground	natural resource	in ground	kg	007440-57-5			Au
													4.3.1.2											Gold, Au 5.4E-4%, Ag 1.5E-5%, in ore, in ground	natural resource	in ground	kg	007440-57-5			Au
													4.3.1.2											Silver, Ag 7.6E-5%, Au 9.7E-5%, in ore, in ground	natural resource	in ground	kg	007440-22-4			Ag
													4.3.1.2											Silver, Ag 1.5E-4%, Au 6.8E-4%, in ore, in ground	natural resource	in ground	kg	007440-22-4			Ag
													4.3.1.2											Silver, Ag 1.5E-5%, Au 5.4E-4%, in ore, in ground	natural resource	in ground	kg	007440-22-4			Ag
													4.3.1.2											Copper, Cu 0.38%, in mixed ore, in ground	natural resource	in ground	kg	007440-50-8			Cu
													4.3.1.2											Gold, Au 9.7E-4%, in mixed ore, in ground	natural resource	in ground	kg	007440-57-5			Au
													4.3.1.2											Lead, Pb 0.014%, in mixed ore, in ground	natural resource	in ground	kg	007439-92-1			Pb
													4.3.1.2											Silver, Ag 9.7E-4%, in mixed ore, in ground	natural resource	in ground	kg	007440-22-4			Ag
													4.3.1.2											Zinc, Zn 0.63%, in mixed ore, in ground	natural resource	in ground	kg	007440-66-6			Zn
													4.3.1.2											Silver, Ag 5.4E-3%, in mixed ore, in ground	natural resource	in ground	kg	007440-22-4			Ag
													4.3.1.2											Gold, Au 1.8E-4%, in mixed ore, in ground	natural resource	in ground	kg	007440-57-5			Au
													4.3.1.2											Copper, Cu 0.2%, in mixed ore, in ground	natural resource	in ground	kg	007440-50-8			Cu
													4.3.1.2											Lead, Pb 3.6E-1%, in mixed ore, in ground	natural resource	in ground	kg	007439-92-1			Pb
													4.3.1.2											Zinc, Zn 3.1%, in mixed ore, in ground	natural resource	in ground	kg	007440-66-6			Zn
													4.3.1.2											Silver, Ag 1.8E-6%, in mixed ore, in ground	natural resource	in ground	kg	007440-22-4			Ag
													4.3.1.2											Gold, Au 1.0E-7%, in mixed ore, in ground	natural resource	in ground	kg	007440-57-5			Au
													4.3.1.2											Nickel, Ni 2.5E+0%, in mixed ore, in ground	natural resource	in ground	kg	007440-02-0			Ni
													4.3.1.2											Copper, Cu 6.8E-1%, in mixed ore, in ground	natural resource	in ground	kg	007440-50-8			Cu
													4.3.1.2											Cobalt, Co 5.0E-2%, in mixed ore, in ground	natural resource	in ground	kg	007440-48-4			Co
													4.3.1.2											Platinum, Pt 4.7E-7%, in mixed ore, in ground	natural resource	in ground	kg	007440-06-4
													4.3.1.2											Palladium, Pd 1.6E-6%, in mixed ore, in ground	natural resource	in ground	kg	007440-05-3
													4.3.1.2											Rhodium, Rh 1.6E-7%, in mixed ore, in ground	natural resource	in ground	kg	007440-16-6
													4.3.1.2											Laterite, in ground	natural resource	in ground	kg
													4.3.1.2											Gangue, in ground	natural resource	in ground	kg
													4.3.1.2											Zinc, in ground	natural resource	in ground	kg	007440-66-6			Zn
													4.3.1.2											Lead, in ground	natural resource	in ground	kg	007439-92-1			Pb
													4.3.1.2											Silver, in ground	natural resource	in ground	kg	007440-22-4			Ag
													4.3.1.2											Copper, 1.25% in sulfide, Cu 0.24% and Zn 0,1% in crude ore, in ground	natural resource	in ground	kg	007440-50-8
													4.3.1.2											Barium, in ground	natural resource	in ground	kg	007440-39-3			Ba
													4.3.1.2											Cadmium, in ground	natural resource	in ground	kg	007440-43-9			Cd
													4.3.1.2											Calcium, in ground	natural resource	in ground	kg	007440-70-2			Ca
													4.3.1.2											Manganese, in ground	natural resource	in ground	kg	007439-96-5			Mn
													4.3.1.2											Mercury, in ground	natural resource	in ground	kg	007439-97-6			Hg
													4.3.1.2											Potassium, in ground	natural resource	in ground	kg	007440-09-7			K
													4.3.1.2											Phosphorus, in ground	natural resource	in ground	kg	007723-14-0			P
													4.3.1.2											Sodium, in ground	natural resource	in ground	kg	007440-23-5			Na
													4.3.1.2											Vanadium, in ground	natural resource	in ground	kg	007440-62-2			V
													4.3.1.2											Actinium, in ground	natural resource	in ground	kg	007440-34-8			Ac
													4.3.1.2											Antimony, in ground	natural resource	in ground	kg	007440-36-0		Stibnite	Sb
													4.3.1.2											Arsenic, in ground	natural resource	in ground	kg	007440-38-2			As
													4.3.1.2											Astatine, in ground	natural resource	in ground	kg	007440-68-8		astatanylastatine	At
													4.3.1.2											Beryllium, in ground	natural resource	in ground	kg	007440-41-7			Be
													4.3.1.2											Bismuth, in ground	natural resource	in ground	kg	007440-69-9			Bi
													4.3.1.2											Boron, in ground	natural resource	in ground	kg	007440-42-8			B
													4.3.1.2											Caesium, in ground	natural resource	in ground	kg	007440-46-2		Cesium	Cs
													4.3.1.2											Cerium, in ground	natural resource	in ground	kg	007440-45-1			Ce
													4.3.1.2											Dysprosium, in ground	natural resource	in ground	kg	007429-91-6			Dy
													4.3.1.2											Erbium, in ground	natural resource	in ground	kg	007440-52-0			Er
													4.3.1.2											Europium, in ground	natural resource	in ground	kg	007440-53-1			Eu
													4.3.1.2											Fluorine, in ground	natural resource	in ground	kg	007782-41-4		molecular fluorine	F
													4.3.1.2											Fluorspar, in ground	natural resource	in ground	kg	007789-75-5			CaF₂
													4.3.1.2											Gadolinium, in ground	natural resource	in ground	kg	007440-54-2			Gd
													4.3.1.2											Germanium, in ground	natural resource	in ground	kg	007440-56-4		Germane	Ge
													4.3.1.2											Hafnium, in ground	natural resource	in ground	kg	007440-58-6			Hf
													4.3.1.2											Holmium, in ground	natural resource	in ground	kg	007440-60-0			Ho
													4.3.1.2											Indium, in ground	natural resource	in ground	kg	007440-74-6			In
													4.3.1.2											Iridium, in ground	natural resource	in ground	kg	007439-88-5			Ir
													4.3.1.2											Kaolinite, in ground	natural resource	in ground	kg	001318-74-7			Al₂Si₂O₅(OH)₄
													4.3.1.2											Lanthanum, in ground	natural resource	in ground	kg	007439-91-0			La
													4.3.1.2											Kieserite, in ground	natural resource	in ground	kg	014567-64-7			MgSO4·H2O
													4.3.1.2											Lithium, in ground	natural resource	in ground	kg	007439-93-2			Li
													4.3.1.2											Lutetium, in ground	natural resource	in ground	kg	000439-94-3			Lu
													4.3.1.2											Magnesite, in ground	natural resource	in ground	kg	000546-93-0		magnesium	MgCO₃
													4.3.1.2											Molybdenum, in ground	natural resource	in ground	kg	007439-98-7			Mo
													4.3.1.2											Neodymium, in ground	natural resource	in ground	kg	007440-00-8			Nd
													4.3.1.2											Niobium, in ground	natural resource	in ground	kg	007440-03-1			Nb
													4.3.1.2											Osmium, in ground	natural resource	in ground	kg	007440-04-2			Os
													4.3.1.2											Polonium, in ground	natural resource	in ground	kg	007440-08-6			Po
													4.3.1.2											Protactinium, in ground	natural resource	in ground	kg	007440-13-3			Pa
													4.3.1.2											Praseodymium, in ground	natural resource	in ground	kg	007440-10-0			Pr
													4.3.1.2											Radium, in ground	natural resource	in ground	kg	007440-14-4			Ra
													4.3.1.2											Rhenium, in ground	natural resource	in ground	kg	007440-15-5			Re
													4.3.1.2											Rubidium, in ground	natural resource	in ground	kg	007440-17-7			Rb
													4.3.1.2											Ruthenium, in ground	natural resource	in ground	kg	007440-18-8			Ru
													4.3.1.2											Samarium, in ground	natural resource	in ground	kg	007440-19-9			Sm
													4.3.1.2											Scandium, in ground	natural resource	in ground	kg	007440-20-2			Sc
													4.3.1.2											Selenium, in ground	natural resource	in ground	kg	007782-49-2			Se
													4.3.1.2											Silicon, in ground	natural resource	in ground	kg	007440-21-3			Si
													4.3.1.2											Sylvite, in ground	natural resource	in ground	kg	007447-40-7		chloride	KCl
													4.3.1.2											Tantalum, in ground	natural resource	in ground	kg	007440-25-7			Ta
													4.3.1.2											Tellurium, in ground	natural resource	in ground	kg	013494-80-9			Te
													4.3.1.2											Terbium, in ground	natural resource	in ground	kg	007440-27-9			Tb
													4.3.1.2											Thallium, in ground	natural resource	in ground	kg	007440-28-0			Tl
													4.3.1.2											Thorium, in ground	natural resource	in ground	kg	007440-29-1			Th
													4.3.1.2											Tungsten, in ground	natural resource	in ground	kg	007440-33-7			W
													4.3.1.2											Thulium, in ground	natural resource	in ground	kg	007440-30-4			Tm
													4.3.1.2											Ytterbium, in ground	natural resource	in ground	kg	007440-64-4			Yb
													4.3.1.2											Yttrium, in ground	natural resource	in ground	kg	007440-65-5			Y
													4.3.1.2											Cobalt, in ground	natural resource	in ground	kg	007440-48-4			Co
													4.3.1.2											Gallium, in ground	natural resource	in ground	kg	007440-55-3			Ga
													4.3.1.2											Aluminium, in ground	natural resource	in ground	kg	007429-90-5		aluminum	Al
													4.3.1.2											Strontium, in ground	natural resource	in ground	kg	007440-24-6			Sr
													4.3.1.2											Iron, in ground	natural resource	in ground	kg	007439-89-6			Fe
													4.3.1.2											Chromium, in ground	natural resource	in ground	kg	007440-47-3			Cr
													4.3.1.2											Titanium, in ground	natural resource	in ground	kg	007440-32-6			Ti
													4.3.1.2											Zirconium, in ground	natural resource	in ground	kg	007440-67-7			Zr
													4.3.1.2											Platinum, in ground	natural resource	in ground	kg	007440-06-4			Pt
													4.3.1.2											Palladium, in ground	natural resource	in ground	kg	007440-05-3			Pd
													4.3.1.2											Rhodium, in ground	natural resource	in ground	kg	007440-16-6			Rh
													4.3.1.2											Nickel, in ground	natural resource	in ground	kg	007440-02-0			Ni
													4.3.1.2											Gold, in ground	natural resource	in ground	kg	007440-57-5			Au
													4.3.1.2											Copper, in ground	natural resource	in ground	kg	007440-50-8			Cu
													4.3.1.2											Magnesium, in ground	natural resource	in ground	kg	007439-95-4			Mg
													4.3.1.2											Tin, in ground	natural resource	in ground	kg	007440-31-5			Sn
CICES Extended	Provisioning (Abiotic)	Non-aqueous natural abiotic ecosystem outputs	Mineral substances used for nutrition, materials or energy	Mineral substances used for as an energy source	Amount by type	Natural inorganic materials from nature that we can use as an energy source	Reference biophysical or inorganic chemical mechanism/characteristic/property...	…that can be used for as an energy source	Uranium	Energy production			4.3.1.3	Not assigned	N/A	N/A	-	No equivalent	No equivalent	No equivalent			√
																								Uranium, in ground	natural resource	in ground	kg	007440-61-1			U
CICES Extended	Provisioning (Abiotic)	Non-aqueous natural abiotic ecosystem outputs	Non-mineral substances or ecosystem properties used for nutrition, materials or energy	Non-mineral substances or ecosystem properties used for nutritional purposes	Amount by type	The ways the physical environment contribute to our nutritional health	Reference biophysical or inorganic chemical mechanism/characteristic/property...	…that can be used for nutrition	Sunlight	Vitamin D			4.3.2.1	Not assigned	Non-mineral	N/A	-	No equivalent	No equivalent	No equivalent			√	(no ecoinvent flow currently exists to represent this ES class)								Solar radiation flow, in MJ, or (watt/cm), to be implemented
CICES Extended	Provisioning (Abiotic)	Non-aqueous natural abiotic ecosystem outputs	Non-mineral substances or ecosystem properties used for nutrition, materials or energy	Non-mineral substances used for materials	Amount by type	Gaseous, fluid or non-mineral solid inorganic materials from nature that we can use (excludes water vapour)	Reference biophysical or inorganic chemical mechanism/characteristic/property...	…that can be used for material purposes	Ozone; or mineraloids (e.g. Opal)	Health benefit; gems			4.3.2.2	Not assigned	Gas	N/A	-	No equivalent	No equivalent	No equivalent			√
													4.3.2.1											Krypton, in air	natural resource	in air	kg	007439-90-9			Kr
													4.3.2.2											Xenon, in air	natural resource	in air	kg	007440-63-3			Xe
													4.3.2.2											Argon-40	natural resource	in air	kg	007440-37-1		argon	Ar
													4.3.2.2											Helium, 0.08% in natural gas, in ground	natural resource	in ground	kg	007440-59-7			He
													4.3.1.2											Helium, in natural gas, in ground	natural resource	in ground	kg	007440-59-7			He	To be checked how it is used in ecoinvent
													4.3.2.2											Oxygen	natural resource	in air	kg	007782-44-7		molecular oxygen	O2
													4.3.2.2											Nitrogen	natural resource	in air	kg	007727-37-9		molecular nitrogen	N
													4.3.2.2											Coal, brown, in ground	natural resource	in ground	kg
													4.3.2.2											Coal, hard, unspecified, in ground	natural resource	in ground	kg
													4.3.2.2											Gas, mine, off-gas, process, coal mining	natural resource	in ground	m3	008006-14-2
													4.3.2.2											Gas, natural, in ground	natural resource	in ground	m3	008006-14-2
													4.3.2.2											Oil, crude, in ground	natural resource	in ground	kg
													4.3.1.2											Clay, bentonite, in ground	natural resource	in ground	kg	001302-78-9
													4.3.1.2											Clay, unspecified, in ground	natural resource	in ground	kg
													4.3.1.2											Granite, in ground	natural resource	in ground	kg	219714-96-2			C16H14F5N5O5S
													4.3.1.2											Gravel, in ground	natural resource	in ground	kg
													4.3.1.2											Sand, unspecified, in ground	natural resource	in ground	kg
													4.3.1.2											Shale, in ground	natural resource	in ground	kg					Check whether it is also used in shale gas production, and thus for energy purposes…
CICES Extended	Provisioning (Abiotic)	Non-aqueous natural abiotic ecosystem outputs	Non-mineral substances or ecosystem properties used for nutrition, materials or energy	Wind energy	Amount by type	Wind power	Air flows…	…. that can be used as an energy source	Wind power	Renewable energy source			4.3.2.3	Not assigned	Wind	N/A	-	No equivalent	No equivalent	No equivalent			√
																								Energy, kinetic (in wind), converted	natural resource	in air	MJ
CICES Extended	Provisioning (Abiotic)	Non-aqueous natural abiotic ecosystem outputs	Non-mineral substances or ecosystem properties used for nutrition, materials or energy	Solar energy	Amount by type	Solar power	Energy from sun light..	…. that can be used as an energy source	Solar power	Renewable energy source			4.3.2.4	Not assigned	Solar	N/A	-	No equivalent	No equivalent	No equivalent			√
																								Energy, solar, converted	natural resource	in air	MJ
CICES Extended	Provisioning (Abiotic)	Non-aqueous natural abiotic ecosystem outputs	Non-mineral substances or ecosystem properties used for nutrition, materials or energy	Geothermal	Amount by type	Using underground heat	Heat in the earth' crust	…. that can be used as an energy source	Hot springs	Renewable energy source			4.3.2.5	Not assigned	Geo-thermal	N/A	-	No equivalent	No equivalent	No equivalent			√
																								Energy, geothermal, converted	natural resource	in ground	MJ
CICES Extended	Provisioning (Abiotic)	Non-aqueous natural abiotic ecosystem outputs	Other mineral or non-mineral substances or ecosystem properties used for nutrition, materials or energy	Other	Use nested codes to allocate other provisioning services from non-living systems to appropriate Groups and Classes								4.3.2.6	Not assigned	Not recognised in V4.3	N/A	-	No equivalent	No equivalent	No equivalent	n/a		n/a										n/a	n/a	n/a
																								Water, in air	natural resource	in air	m3	007732-18-5				Selected after exclusion from other categories (not necessarily pertinent)
CICES Extended	Regulation & Maintenance (Abiotic)	Transformation of biochemical or physical inputs to ecosystems	Mediation of waste, toxics and other nuisances by non-living processes	Dilution by freshwater and marine ecosystems	Amount by type	Diluting wastes	The reduction in concentration of an organic or inorganic substances by mixing in a fresh water ecosystem	…that mitigates its harmful effects and reduces the costs of disposal by other means	Use of freshwater/marine systems as a pollution sink	Reduction of disposal costs, disposal of wastes			5.1.1.1	Not assigned	Dilution by atmosphere, freshwater and marine ecosystems	2.1.2.2	-	No equivalent	No equivalent	No equivalent			√	(no ecoinvent flow currently exists to represent this ES class)								Additional volume of water required to dilute waste
CICES Extended	Regulation & Maintenance (Abiotic)	Transformation of biochemical or physical inputs to ecosystems	Mediation of waste, toxics and other nuisances by non-living processes	Dilution by atmosphere	Amount by type	Diluting wastes	The reduction in concentration of an organic or inorganic substance by mixing in the atmosphere	…that mitigates its harmful effects and reduces the costs of disposal by other means	Use of atmosphere as a pollution sink	Reduction of disposal costs, disposal of wastes			5.1.1.2	Not assigned	Dilution by atmosphere, freshwater and marine ecosystems	2.1.2.2	-	No equivalent	No equivalent	No equivalent			√	(no ecoinvent flow currently exists to represent this ES class)								Estimated surface of additional woodland required to absorb waste or make clean air
CICES Extended	Regulation & Maintenance (Abiotic)	Transformation of biochemical or physical inputs to ecosystems	Mediation of waste, toxics and other nuisances by non-living processes	Mediation by other chemical or physical means (e.g. via Filtration, sequestration, storage or accumulation)	Amount by type	Natural processing of wastes	Mediation of waste, toxics and other nuisances, by natural chemical and physical processes…	..the can protect people	Dissolved silica in runoff	Biogeochemical effects of reduced dissolved silica in estuaries causing shifts in phytoplankton species composition	Humborg, C., Conley, D.J., Rahm, L., Wulff, F., Cociasu, A. and Ittekkot, V., 2000. Silicon retention in river basins: far-reaching effects on biogeochemistry and aquatic food webs in coastal marine environments. AMBIO: A Journal of the Human Environment, 29(1), pp.45-50.		5.1.1.3	Not assigned	Mediation of waste, toxics and other nuisances, by natural chemical and physical processes	N/A	-	No equivalent	No equivalent	No equivalent			√	(no ecoinvent flow currently exists to represent this ES class)								Additional volume of water required to dilute waste
CICES Extended	Regulation & Maintenance (Abiotic)	Transformation of biochemical or physical inputs to ecosystems	Mediation of nuisances of anthropogenic origin	Mediation of nuisances by abiotic structures or processes	Amount by type	Natural protection	Mediation of environmental conditions by abiotic structures or processes…	…. That can reduce or mitigate a nuisance to people	Screening effect of topography	Visual quality			5.1.2.1	Not assigned	Not recognised in V4.3	N/A	-	No equivalent	No equivalent	No equivalent			tbd										tbd		(√)	Terrestrial landscape (physical structures and amenities)
CICES Extended	Regulation & Maintenance (Abiotic)	Regulation of physical, chemical, biological conditions	Regulation of baseline flows and extreme events	Mass flows	Amount by type	Physical barriers to landslides	Mediation of solid flows by natural abiotic structures..	… that can protect people	Sand bar providing coastal protection	Reduction in damage costs			5.2.1.1	Not assigned	Mediation of flows by natural abiotic structures	N/A	-	No equivalent	No equivalent	No equivalent			tbd										tbd		(√)	Coastal/Marine landscape quality
CICES Extended	Regulation & Maintenance (Abiotic)	Regulation of physical, chemical, biological conditions	Regulation of baseline flows and extreme events	Liquid flows	Amount by type	Physical barriers to flows	Mediation of liquid flows by natural abiotic structures..	… that can protect people	Natural levees providing flood protection	Reduction in damage costs			5.2.1.2	Not assigned	Not recognised in V4.3	N/A	-	No equivalent	No equivalent	No equivalent			tbd										tbd		(√)	Terrestrial landscape (physical structures and amenities)
CICES Extended	Regulation & Maintenance (Abiotic)	Regulation of physical, chemical, biological conditions	Regulation of baseline flows and extreme events	Gaseous flows	Amount by type	Physical barriers to air movements	Mediation of gaseous flows by natural abiotic structures..	… that can protect people	Topographic control of wind velocity	Reduction in damage costs			5.2.1.3	Not assigned	Not recognised in V4.3	N/A	-	No equivalent	No equivalent	No equivalent			tbd										tbd		(√)	Terrestrial landscape (physical structures and amenities)
CICES Extended	Regulation & Maintenance (Abiotic)	Regulation of physical, chemical, biological conditions	Maintenance of physical, chemical, abiotic conditions	Maintenance and regulation by inorganic natural chemical and physical processes	Amount by type	Regulating living conditions by the physical environment	Maintenance of physical, chemical, abiotic conditions…	… that affect peoples well-being or comfort	Land/sea breezes	Human comfort			5.2.2.1	Not assigned	Maintenance of physical, chemical, abiotic conditions	N/A	-	No equivalent	No equivalent	No equivalent			tbd										tbd		(√)	Coastal/Marine landscape quality
CICES Extended	Regulation & Maintenance (Abiotic)	Other type of regulation and maintenance service by abiotic processes	Other	Other	Use nested codes to allocate other provisioning services from non-living systems to appropriate Groups and Classes								5.3.X.X	Not assigned	Not recognised in V4.3	N/A	-	No equivalent	No equivalent	No equivalent	n/a		n/a										n/a	n/a	n/a
CICES Extended	Cultural (Abiotic)	Direct, in-situ and outdoor interactions with natural physical systems that depend on presence in the environmental setting	Physical and experiential interactions with natural abiotic components of the environment	Natural, abiotic characteristics of nature that enable active or passive physical and experiential interactions	Amount by type	Things in the physical environment that we can experience actively or passively	Natural, abiotic characteristics of nature that…	...enable active or passive physical and experiential interactions	Caves	Ecotourism			6.1.1.1	Not assigned	Not recognised in V4.3	N/A	-	No equivalent	No equivalent	No equivalent													tbd		√	Ecosystems for recreational purposes and aesthetic services
CICES Extended	Cultural (Abiotic)	Direct, in-situ and outdoor interactions with natural physical systems that depend on presence in the environmental setting	Intellectual and representative interactions with abiotic components of the natural environment	Natural, abiotic characteristics of nature that enable intellectual interactions	Amount by type	Things in the physical environment that we can study or think about	Natural, abiotic characteristics of nature that…	...enable intellectual activities	Rock faces for climbing	Recreation			6.1.2.1	Not assigned	Not recognised in V4.3	N/A	-	No equivalent	No equivalent	No equivalent													tbd		√	Ecosystems for recreational purposes and aesthetic services
CICES Extended	Cultural (Abiotic)	Indirect, remote, often indoor interactions with physical systems that do not require presence in the environmental setting	Spiritual, symbolic and other interactions with the abiotic components of the natural environment	Natural, abiotic characteristics of nature that enable spiritual, symbolic and other interactions	Amount by type	Things in the physical environment that are important as symbols	Natural, abiotic characteristics of nature that…	…have symbolic or spiritual importance	Iconic mountain peaks	Identity			6.2.1.1	Not assigned	Not recognised in V4.3	N/A	-	No equivalent	No equivalent	No equivalent													tbd		√	Ecosystems for recreational purposes and aesthetic services
CICES Extended	Cultural (Abiotic)	Indirect, remote, often indoor interactions with physical systems that do not require presence in the environmental setting	Other abiotic characteristics that have a non-use value	Natural, abiotic characteristics or features of nature that have either an existence, option or bequest value	Amount by type	Things in the physical environment that we think are important to others and future generations	Natural, abiotic characteristics of nature that…	… that we think are important to others and future generations	Distinctive geological formation or geomorphological feature.	Cultural meaning			6.2.2.1	Not assigned	Not recognised in V4.3	N/A	-	No equivalent	No equivalent	No equivalent			tbd										tbd		√	Ecosystems for recreational purposes and aesthetic services
CICES Extended	Cultural (Abiotic)	Other abiotic characteristics of nature that have cultural significance	Other	Other	Use nested codes to allocate other provisioning services from non-living systems to appropriate Groups and Classes								6.3.X.X	Not assigned	Not recognised in V4.3	N/A	-	No equivalent	No equivalent	No equivalent	n/a		n/a										n/a	n/a	n/a

## Sheet: Table S1.6
	Table S1.6 Matrix of relationship between economic sectors and ecosystem services supply and demand
	D = demand	=> activities in the sector can possibly make use of the ecosystem service
	D* = internal demand	=> the supplied ecosystem service may be used by process activities in the same sector (e.g., crop residues reused on site to enrich the soil with nutrients; recovery of animal waste for feeds production)
	S = supply	=> activities in the sector (can contribute to) deliver the ecosystem service					A	A-1	A-2	A-3	B	B-6	B-7	B-8	C	C-10	C-11	C-17	C-20	D	E	E-36	E-38	F	G	H	I	J	K	L	M	N	N-81	O	P	Q	R	R-93	S	T	U
	[Section] Division	Group	Class	Code	Class type	V4.3 Equivalent	Agriculture, forestry and fishing	Crop and animal production, hunting and related service activities	Forestry and logging	Fishing and aquaculture	Mining and quarrying	Extraction of crude petroleum and natural gas	Mining of metal ores	Other mining and quarries	Manufacturing	Manufacture of food products	Manufacture of beverages	Manufacture of paper and paper products	Manufacture of chemicals and chemical products	Electricity, gas, steam and air conditioning supply	Water supply; sewerage, waste management and remediation activities	Water collection, treatment and supply	Waste collection, treatment and disposal activities; materials recovery	Construction	Wholesale and retail trade; repair of motor vehicles and motorcycles	Transportation and storage	Accommodation and food service activities	Information and communication	Financial and insurance activities	Real estate activities	Professional, scientific and technical activities	Administrative and support service activities	Services to buildings and landscape activities	Public administration and defence; compulsory social security	Education	Human health and social work activities	Arts, entertainment and recreation	Sports activities and amusement and recreation activities	Other service activities	Activities of households as employers; undifferentiated goods- and services-producing activities of households for own use	Activities of extraterritorial organizations and bodies
	[Provisioning (Biotic)]
	Biomass	Cultivated terrestrial plants for nutrition, materials or energy	Cultivated terrestrial plants (including fungi, algae) grown for nutritional purposes	1.1.1.1	Crops by amount, type (e.g. cereals, root crops, soft fruit, etc.)	Cultivated crops	S	S	S		D	D	D	D	D	D	D		D																					D
	Biomass	Cultivated terrestrial plants for nutrition, materials or energy	Fibres and other materials from cultivated plants, fungi, algae and bacteria for direct use or processing (excluding genetic materials)	1.1.1.2	Material by amount, type, use, media (land, soil, freshwater, marine)	Fibres and other materials from plants, algae and animals for direct use or processing	S	S/D*	S		D	D	D	D	D			D	D		D	D	D	D
	Biomass	Cultivated terrestrial plants for nutrition, materials or energy	Cultivated plants (including fungi, algae) grown as a source of energy	1.1.1.3	By amount, type, source	Plant-based resources	S	S	S		D	D	D	D						D																				D
	Biomass	Cultivated aquatic plants for nutrition, materials or energy	Plants cultivated by in- situ aquaculture grown for nutritional purposes	1.1.2.1	Plants, algae by amount, type	Plants and algae from in-situ aquaculture	S			S	D	D	D	D	D	D			D																					D
	Biomass	Cultivated aquatic plants for nutrition, materials or energy	Fibres and other materials from in-situ aquaculture for direct use or processing (excluding genetic materials)	1.1.2.2	Plants, algae by amount, type	Plants and algae from in-situ aquaculture	S			S/D*	D	D	D	D	D				D
	Biomass	Cultivated aquatic plants for nutrition, materials or energy	Plants cultivated by in- situ aquaculture grown as an energy source	1.1.2.3	Plants, algae by amount, type	Plants and algae from in-situ aquaculture	S			S	D	D	D	D						D
	Biomass	Reared animals for nutrition, materials or energy	Animals reared for nutritional purposes	1.1.3.1	Animals, products by amount, type (e.g. beef, dairy)	Reared animals and their outputs	S	S/D*			D	D	D	D	D	D			D																					D
	Biomass	Reared animals for nutrition, materials or energy	Fibres and other materials from reared animals for direct use or processing (excluding genetic materials)	1.1.3.2	Material by amount, type, use, media (land, soil, freshwater, marine)	Materials from plants, algae and animals for agricultural use	S	S/D*			D	D	D	D	D				D
	Biomass	Reared animals for nutrition, materials or energy	Animals reared to provide energy (including mechanical)	1.1.3.3	By amount, type, source	Animal-based resources & Animal-based mechanical energy	S	S/D*			D	D	D	D						D
	Biomass	Reared aquatic animals for nutrition, materials or energy	Animals reared by in-situ aquaculture for nutritional purposes	1.1.4.1	Animals by amount, type	Animals from in-situ aquaculture	S			S/D*	D	D	D	D	D	D			D																					D
	Biomass	Reared aquatic animals for nutrition, materials or energy	Fibres and other materials from animals grown by in-situ aquaculture for direct use or processing (excluding genetic materials)	1.1.4.2	Animals by amount, type	Animals from in-situ aquaculture	S			S/D*	D	D	D	D	D				D
	Biomass	Reared aquatic animals for nutrition, materials or energy	Animals reared by in-situ aquaculture as an energy source	1.1.4.3	Animals by amount, type	Animals from in-situ aquaculture	S			S	D	D	D	D						D
	Biomass	Wild plants (terrestrial and aquatic) for nutrition, materials or energy	Wild plants (terrestrial and aquatic, including fungi, algae) used for nutrition	1.1.5.1	Plants, algae by amount, type	Wild plants, algae and their outputs	S		S		D	D	D	D	D	D	D		D																					D
	Biomass	Wild plants (terrestrial and aquatic) for nutrition, materials or energy	Fibres and other materials from wild plants for direct use or processing (excluding genetic materials)	1.1.5.2	Plants, algae by amount, type	Wild plants, algae and their outputs	S		S		D	D	D	D	D			D	D	D	D	D	D	D									D					D
	Biomass	Wild plants (terrestrial and aquatic) for nutrition, materials or energy	Wild plants (terrestrial and aquatic, including fungi, algae) used as a source of energy	1.1.5.3	Material by type/source	Not recognised in V4.3	S		S		D	D	D	D
	Biomass	Wild animals (terrestrial and aquatic) for nutrition, materials or energy	Wild animals (terrestrial and aquatic) used for nutritional purposes	1.1.6.1	Animals by amount, type	Wild animals and their outputs	S	S			D	D	D	D	D	D			D																					D
	Biomass	Wild animals (terrestrial and aquatic) for nutrition, materials or energy	Fibres and other materials from wild animals for direct use or processing (excluding genetic materials)	1.1.6.2	Material by type/source	Not recognised in V4.3	S	S			D	D	D	D					D
	Biomass	Wild animals (terrestrial and aquatic) for nutrition, materials or energy	Wild animals (terrestrial and aquatic) used as a source of energy	1.1.6.3	By amount, type, source	Not recognised in V4.3	S	S			D	D	D	D						D
	Genetic material from all biota (including seed, spore or gamete production)	Genetic material from plants, algae or fungi	Seeds, spores and other plant materials collected for maintaining or establishing a population	1.2.1.1	By species or varieties	Not recognised in V4.3	S	S	S	S	D	D	D	D
	Genetic material from all biota (including seed, spore or gamete production)	Genetic material from plants, algae or fungi	Higher and lower plants (whole organisms) used to breed new strains or varieties	1.2.1.2	By species or varieties	Genetic materials from all biota	S	S	S	S	D	D	D	D
	Genetic material from all biota (including seed, spore or gamete production)	Genetic material from plants, algae or fungi	Individual genes extracted from higher and lower plants for the design and construction of new biological entities	1.2.1.3	Material by type	Genetic materials from all biota	S	S	S	S	D	D	D	D
	Genetic material from all biota (including seed, spore or gamete production)	Genetic material from animals	Animal material collected for the purposes of maintaining or establishing a population	1.2.2.1	By species or varieties	Not recognised in V4.3	S	S		S	D	D	D	D
	Genetic material from all biota (including seed, spore or gamete production)	Genetic material from animals	Wild animals (whole organisms) used to breed new strains or varieties	1.2.2.2	By species or varieties	Genetic materials from all biota	S	S		S	D	D	D	D
	Genetic material from all biota (including seed, spore or gamete production)	Genetic material from organisms	Individual genes extracted from organisms for the design and construction of new biological entities	1.2.2.3	Material by type	Genetic materials from all biota	S	S	S	S	D	D	D	D
	Other types of provisioning service from biotic sources	Other	Other	1.3.X.X	Use nested codes to allocate other provisioning services from living systems to appropriate Groups and Classes	Not recognised in V4.3
	[Regulation & Maintenance (Biotic)]
	Transformation of biochemical or physical inputs to ecosystems	Mediation of wastes or toxic substances of anthropogenic origin by living processes	Bio-remediation by micro-organisms, algae, plants, and animals	2.1.1.1	By type of living system or by waste or subsistence type	Bio-remediation by micro-organisms, algae, plants, and animals	S/D*	S	S	S	D				D					D	D		S/D*	D		D
	Transformation of biochemical or physical inputs to ecosystems	Mediation of wastes or toxic substances of anthropogenic origin by living processes	Filtration/sequestration/storage/accumulation by micro-organisms, algae, plants, and animals	2.1.1.2	By type of living system, or by water or substance type	Filtration/sequestration/storage/accumulation by micro-organisms, algae, plants, and animals And Filtration/sequestration/storage/accumulation by ecosystems	S/D*	S	S	S	D				D					D	D		S/D*	D		D
	Transformation of biochemical or physical inputs to ecosystems	Mediation of nuisances of anthropogenic origin	Smell reduction	2.1.2.1	By type of living system	Mediation of smell/noise/visual impacts	S/D*	S	S	S	D				D					D	D		S/D*	D		D
	Transformation of biochemical or physical inputs to ecosystems	Mediation of nuisances of anthropogenic origin	Noise attenuation	2.1.2.2	By type of living system	Mediation of smell/noise/visual impacts	S/D*	S	S	S	D				D					D	D			D		D
	Transformation of biochemical or physical inputs to ecosystems	Mediation of nuisances of anthropogenic origin	Visual screening	2.1.2.3	By type of living system	Mediation of smell/noise/visual impacts	S/D*	S	S	S	D				D					D	D			D		D
	Regulation of physical, chemical, biological conditions	Regulation of baseline flows and extreme events	Control of erosion rates	2.2.1.1	By reduction in risk, area protected	Stabilisation and control of erosion rates	S/D*	S	S		D				D					D	D			D		D
	Regulation of physical, chemical, biological conditions	Regulation of baseline flows and extreme events	Buffering and attenuation of mass movement	2.2.1.2	By reduction in risk, area protected	Buffering and attenuation of mass flows	S/D*	S	S		D				D					D	D			S/D*		D
	Regulation of physical, chemical, biological conditions	Regulation of baseline flows and extreme events	Hydrological cycle and water flow regulation (Including flood control, and coastal protection)	2.2.1.3	By depth/volumes	Hydrological cycle and water flow maintenance And Flood protection	S/D*	S	S		D				D					D	D			D		D
	Regulation of physical, chemical, biological conditions	Regulation of baseline flows and extreme events	Wind protection	2.2.1.4	By reduction in risk, area protected	Storm protection	S/D*		S		D				D					D	D			S/D*		D
	Regulation of physical, chemical, biological conditions	Regulation of baseline flows and extreme events	Fire protection	2.2.1.5	By reduction in risk, area protected	Not recognised in V4.3	S/D*		S		D				D					D	D			S/D*		D
	Regulation of physical, chemical, biological conditions	Lifecycle maintenance, habitat and gene pool protection	Pollination (or 'gamete' dispersal in a marine context)	2.2.2.1	By amount and pollinator	Pollination and seed dispersal	S/D*	S	S		D				D									D		D
	Regulation of physical, chemical, biological conditions	Lifecycle maintenance, habitat and gene pool protection	Seed dispersal	2.2.2.2	By amount and dispersal agent	Pollination and seed dispersal	S/D*	S	S	S	D				D									D		D
	Regulation of physical, chemical, biological conditions	Lifecycle maintenance, habitat and gene pool protection	Maintaining nursery populations and habitats (Including gene pool protection)	2.2.2.3	By amount and source	Maintaining nursery populations and habitats	S/D*	S	S	S	D				D									D		D
	Regulation of physical, chemical, biological conditions	Pest and disease control	Pest control (including invasive species)	2.2.3.1	By reduction in incidence, risk, area protected by type of living system	Pest control	S/D*	S	S		D				D
	Regulation of physical, chemical, biological conditions	Pest and disease control	Disease control	2.2.3.2	By reduction in incidence, risk, area protected by type of living system	Disease control	S/D*	S	S	S	D				D
	Regulation of physical, chemical, biological conditions	Regulation of soil quality	Weathering processes and their effect on soil quality	2.2.4.1	By amount/concentration and source	Weathering processes	S/D*	S	S		D				D					D	D			D
	Regulation of physical, chemical, biological conditions	Regulation of soil quality	Decomposition and fixing processes and their effect on soil quality	2.2.4.2	By amount/concentration and source	Decomposition and fixing processes	S/D*	S	S		D				D					D	D			D
	Regulation of physical, chemical, biological conditions	Water conditions	Regulation of the chemical condition of freshwaters by living processes	2.2.5.1	By type of living system	Chemical condition of freshwaters	S/D*	S	S	S	D				D					D	D			D
	Regulation of physical, chemical, biological conditions	Water conditions	Regulation of the chemical condition of salt waters by living processes	2.2.5.2	By type of living system	Chemical condition of salt waters	S/D*	S	S	S	D				D					D	D			D
	Regulation of physical, chemical, biological conditions	Atmospheric composition and conditions	Regulation of chemical composition of atmosphere and oceans	2.2.6.1	By contribution of type of living system to amount, concentration or climatic parameter	Global climate regulation by reduction of greenhouse gas concentrations	S/D*	S	S		D				D					D	D			D		D	D			D		D					D			D
	Regulation of physical, chemical, biological conditions	Atmospheric composition and conditions	Regulation of temperature and humidity, including ventilation and transpiration	2.2.6.2	By contribution of type of living system to amount, concentration or climatic parameter	Micro and regional climate regulation &Ventilation and transpiration	S/D*	S	S		D				D					D	D			D		D	D			D		D					D			D
	Other types of regulation and maintenance service by living processes	Other	Other	2.3.X.X	Use nested codes to allocate other regulating and maintenance services from living systems to appropriate Groups and Classes	Not recognised in V4.3
	[Cultural (Biotic)]
	Direct, in-situ and outdoor interactions with living systems that depend on presence in the environmental setting	Physical and experiential interactions with natural environment	Characteristics of living systems that that enable activities promoting health, recuperation or enjoyment through active or immersive interactions	3.1.1.1	By type of living system or environmental setting	Experiential use of plants, animals and land-/seascapes in different environmental settings	S				D									S			S	D			D										D			D
	Direct, in-situ and outdoor interactions with living systems that depend on presence in the environmental setting	Physical and experiential interactions with natural environment	Characteristics of living systems that enable activities promoting health, recuperation or enjoyment through passive or observational interactions	3.1.1.2	By type of living system or environmental setting	Physical use of land-/seascapes in different environmental settings	S				D									S			S	D			D										D			D
	Direct, in-situ and outdoor interactions with living systems that depend on presence in the environmental setting	Intellectual and representative interactions with natural environment	Characteristics of living systems that enable scientific investigation or the creation of traditional ecological knowledge	3.1.2.1	By type of living system or environmental setting	Scientific	S				D									S			S	D			D										D			D
	Direct, in-situ and outdoor interactions with living systems that depend on presence in the environmental setting	Intellectual and representative interactions with natural environment	Characteristics of living systems that enable education and training	3.1.2.2	By type of living system or environmental setting	Educational	S				D									S			S	D			D										D			D
	Direct, in-situ and outdoor interactions with living systems that depend on presence in the environmental setting	Intellectual and representative interactions with natural environment	Characteristics of living systems that are resonant in terms of culture or heritage	3.1.2.3	By type of living system or environmental setting	Heritage, cultural	S				D													D			D										D			D
	Direct, in-situ and outdoor interactions with living systems that depend on presence in the environmental setting	Intellectual and representative interactions with natural environment	Characteristics of living systems that enable aesthetic experiences	3.1.2.4	By type of living system or environmental setting	Aesthetic	S				D									S			S	D			D										D			D
	Indirect, remote, often indoor interactions with living systems that do not require presence in the environmental setting	Spiritual, symbolic and other interactions with natural environment	Elements of living systems that have symbolic meaning	3.2.1.1	By type of living system or environmental setting	Symbolic	S				D													D			D										D			D
	Indirect, remote, often indoor interactions with living systems that do not require presence in the environmental setting	Spiritual, symbolic and other interactions with natural environment	Elements of living systems that have sacred or religious meaning	3.2.1.2	By type of living system or environmental setting	Sacred and/or religious	S				D													D			D										D			D
	Indirect, remote, often indoor interactions with living systems that do not require presence in the environmental setting	Spiritual, symbolic and other interactions with natural environment	Elements of living systems used for entertainment or representation	3.2.1.3	By type of living system or environmental setting	Entertainment	S				D													D			D										D			D
	Indirect, remote, often indoor interactions with living systems that do not require presence in the environmental setting	Other biotic characteristics that have a non-use value	Characteristics or features of living systems that have an existence value	3.2.2.1	By type of living system or environmental setting	Existence	S				D													D			D										D			D
	Indirect, remote, often indoor interactions with living systems that do not require presence in the environmental setting	Other biotic characteristics that have a non-use value	Characteristics or features of living systems that have an option or bequest value	3.2.2.2	By type of living system or environmental setting	Bequest	S				D													D			D										D			D
	Other characteristics of living systems that have cultural significance	Other	Other	3.3.X.X	Use nested codes to allocate other cultural services from living systems to appropriate Groups and Classes	Not recognised in V4.3
	[Provisioning (Abiotic)]
	Water	Surface water used for nutrition, materials or energy	Surface water for drinking	4.2.1.1	By amount, type, source	Surface water for drinking	D	D							D	D	D			S	S	S					D			D		D					D			D
	Water	Surface water used for nutrition, materials or energy	Surface water used as a material (non-drinking purposes)	4.2.1.2	By amount & source	Surface water for non-drinking purposes	D	D	D		D				D	D	D	D	D	S	S	S/D*	D	D		D	D			D		D					D			D
	Water	Surface water used for nutrition, materials or energy	Freshwater surface water used as an energy source	4.2.1.3	By amount, type, source	Not recognised in V4.3														S	S	S/D*
	Water	Surface water used for nutrition, materials or energy	Coastal and marine water used as energy source	4.2.1.4	By amount, type, source	Not recognised in V4.3					D				D					S	S	S/D*	D
	Water	Ground water for used for nutrition, materials or energy	Ground (and subsurface) water for drinking	4.2.2.1	By amount, type, source	Ground water for drinking	D	D												S	S	S/D*					D			D		D					D			D
	Water	Ground water for used for nutrition, materials or energy	Ground water (and subsurface) used as a material (non-drinking purposes)	4.2.2.2	By amount & source	Ground water as source of energy	D	D	D		D									S	S	S/D*	D	D		D	D			D		D					D			D
	Water	Ground water for used for nutrition, materials or energy	Ground water (and subsurface) used as an energy source	4.2.2.3	By amount & source	Ground water for non-drinking purposes														S	S	S/D*
	Water	Other aqueous ecosystem outputs	Other	4.2.X.X	Use nested codes to allocate other provisioning services from non-living systems to appropriate Groups and Classes	Not recognised in V4.3
	Non-aqueous natural abiotic ecosystem outputs	Mineral substances used for nutrition, materials or energy	Mineral substances used for nutritional purposes	4.3.1.1	Amount by type	Minerals	S				S		S	S	D
	Non-aqueous natural abiotic ecosystem outputs	Mineral substances used for nutrition, materials or energy	Mineral substances used for material purposes	4.3.1.2	Amount by type	Solid	S				S		S	S	D
[truncated: 23 more rows]

## Sheet: Table S1.7
Table S1.7 Detail on ISIC Rev.4 codes
[truncated: 791 more rows]
